# Supplementary material for: Co-Regulation of Protein Coding Genes by Transcription Factor and Long Non-Coding RNA in SARS-CoV-2 Infected Cells: An In Silico Analysis
Source: Noncoding RNA. 2021 Nov 29;7(4):74. doi: 10.3390/ncrna7040074 (PMC8708613; doi:10.3390/ncrna7040074)
Supplement: Supplementary file 1 [file ncrna-07-00074-s001.zip › ncrna-1444146-Supplementary Table .xlsx]

## Sheet: Summary
	Index
Table S1	Supplementary Table introduction STXI1: Altered expression of long non-coding RNA by different viruses other than SARS-CoV-2.
Table S2	Supplementary Table introduction STXI2A: Altered expression of longnon-coding RNA in cells infected with SARS-CoV-2 and different tissues from COVID-19 patients.
Table S3	Supplementary Table introduction STXI2B: Altered expression of long non-coding RNA in SARS-CoV-2 infected cells only in one experiment.
Table S4	Supplementary Table introduction STXI2C: Altered expression of long non-coding RNA in more than one experiment.
Table S5	Supplementary Table introduction STXI2D: Altered expression of long non-coding RNA in more than one experiment but in opposite direction.
Table S6	Supplementary Table STX1A: Increased expression of lncRNA in more than one study.
Table S7	Supplementary Table STX1B: Decreased expression of the lncRNA in the present study.
Table S8	Supplementary Table STX1C: Altered expression of lncRNA in one experiments.
Table S9	Supplementary Table STX1D: Comparison of deregulated lncRNA in the present study with the already published results.
Table S10	SupplementaryTableSTX2A: Interacting partners of deregulated lncRNA in SARS-CoV-2 infected cells or COVID-19 patients (Supplementary TableSTX1A and STX1B).
Table S11	SupplementaryTableSTX2B: Interacting partners of decreased lncRNA inSARS-CoV-2 infected cells orCOVID-19 patients (SupplementaryTableSTX2A).
Table S12	SupplementaryTableSTX2C: Interacting partners of increased lncRNA in SARS-CoV-2 infected cells or COVID-19 patients (Supplementary Table STX2A)
Table S13	Supplementary Table STX2D: Number of Interacting partner of deregulated lncRNA
Table S14	Supplementary Table STX3A: Protein classification of lncRNA interacting protein by PANTHER (http://www.pantherdb.org/)
Table S15	Supplementary Table STX3B: Proportion of protein class in different category (http://www.pantherdb.org/)
Table S16	Supplementary Table STX4A: SARS-CoV-2 coded protein interaction with host protein downladed from BioGrid (https://thebiogrid.org/, accesses on June 24, 2021).
Table S17	Supplementary Table STX4B: Common lncRNA interacting protein/gene and viral protein interacting partners (STX4A and STX2A).
Table S18	Supplementary Table STX4C: LncRNA interacting protein with viral protein interacting partners (from STX4B)
Table S19	Supplementary Table STX4D: Viral interacting proteins, their unique interacting host protein and their interacting lncRNA (STX4B)
Table S20	Supplementary Table STX5A: CRISPR screen for the involvement of host genes in modulation of SARS-CoV-2 infection from BioGRID.
Table S21	Supplementary Table STX5B: LncRNA interacting protein that was identified in CRISPR assay.
Table S22	Supplementary Table STX6A: Result of analysis of the deregulated lncRNA that were also altered in response to Interferon treatment. (http://www.interferome.org/interferome/search/showSearch.jspx)
Table S23	Supplementary Table STX6B: Unique altered lncRNA that were also altered in response to IFN (from STX6A).
Table S24	Supplementary Table STX7A: Binding of different TFs within -5Kb to +1Kb of the transcription start sites (ChIPBase v2.0 (http://rna.sysu.edu.cn/chipbase/).
Table S25	Supplementary Table STX7B: Summary of TFs-LncRNA: number of binding sites at the putative promoters of the lnCRNA
Table S26	Supplementary Table STX7C: Possible regulation of lncRNA and their known targets.
Table S27	Supplementary Table STX7D:Proportion of lncRNA regulated by different transcription factors
Table S28	Supplementary Table STX8A: Binding of different TFs at the putative promoters of altered PCG in SARS-CoV-2 infected cells/tissue from COVID-19 patients.
Table S29	Supplementary Table STX8B: Proportion of PCG regulated by different transcription factors.
Table S30	Supplementary Table STX9A: Altered expression of genes in response to IFN treatment (http://www.interferome.org/interferome/home.jspx) among increased genes in SARS-CoV-2 infected cell.
Table S31	Supplementary Table STX9B: Altered expression of genes in response to IFN treatment (http://www.interferome.org/interferome/home.jspx) among decreased genes in SARS-CoV-2 infected cell
Table S32	Supplementary Table STX10: Common deregulated PCG and lncRNA interacting gene/protein
Table S33	Supplementary Table STX11: Coregulated PCG by lncRNA and TFs.
Table S34	Supplementary Table STX12A: Coregulation of PCG by lncRNA that interacts with DNA and TFs (From STX11).
Table S35	Supplementary Table STX12B: Coregulation of decreased PCG by down regulated lncRNA that interacts with DNA and TFs (From STX12A).
Table S36	Supplementary Table STX12C: Coregulation of increased PCG by down regulated lncRNA that interacts with DNA and TFs (From STX12A)
Table S37	Supplementary Table STX12D: Coregulation of decreased PCG by up regulated lncRNA that interacts with DNA and TFs (From STX12A)
Table S38	Supplementary Table STX13A: Coregulation of PCG by lncRNA that interacts with proteins and TFs (From STX12)
Table S39	Supplementary Table STX13B: Coregulation of decreased PCG by down regulated lncRNA that interacts with protein and TFs (From STX13A)
Table S40	Supplementary Table STX13C: Coregulation of increased PCG by down regulated lncRNA that interacts withprotein and TFs (From STX13A)
Table S41	Supplementary Table STX13D: Coregulation of decreased PCG by up regulated lncRNA that interacts with protein and TFs (From STX13A)
Table S42	Supplementary Table STX13E: Coregulation of increased PCG by up regulated lncRNA that interacts with protein and TFs (From STX13A)
Table S43	Supplementary Table STX14A: Coregulation of PCG by lncRNA that interacts withmRNA and TFs (From STX11)
Table S44	Supplementary Table STX14B: Coregulation of decreased PCG by down regulated lncRNA that interacts with mRNA and TFs (From STX14A)
Table S45	Supplementary Table STX14C: Coregulation of decreased PCG by up regulated lncRNA that interacts with mRNA and TFs (From STX14A)
Table S46	Supplementary Table STX14D: Coregulation of increased PCG by down regulated lncRNA that interacts with protein and TFs (From STX14A)
Table S47	Supplementary Table STX14E: Coregulation of increased PCG by up regulated lncRNA that interacts with protein and TFs (From STX14A)
Table S48	Supplementary Table STX15A: Effects of knockdown/over expression of deregulated lncRNA level on PCG expression in highthroughput assays from LncRNA2target v3.0
Table S49	Supplementary Table STX15B: Effects of knockdown/over expression of deregulated lncRNA level on PCG expression observed in the present study (from STX15A)
Table S50	Supplementary Table STX16A: Enriched pathways with joint targets of TFs and deregulated lncRNA
Table S51	Supplementary Table STX16B: Combined pathways in different categories
Table S52	Supplementary Table STX17A: Biological processes (BP) enriched with joint targets of TF and deregulated lncRNA in SARS-CoV-2 infected cells
Table S53	Supplementary Table STX17B: Combined biological processes in different categories
Table S54	Supplementary Text Table STMT1 Summary of studies for differential expression of lncRNA and protein coding genes
Table S55	Supplementary text Table STRT1A Classification of lncRNA interacting proteins
Table S56	Supplementary text result Table STRT1B Representative enriched proteins of different classes among lncRNA interacting proteins
Table S57	Supplementary Text Table STRT2A: Altered lncRNA expression in response to treatment with IFN1 or IFNII
Table S58	Supplementary Text Table STRT2B: Representative result of altered expression of ncRNA in response to IFN treatment from Interferome v2.01
Table S59	Supplementary Text Table STRT3 Number of binding sites of different transcription factors at the putative promoters of PCG and lncRNA
Table S60	Supplementary Text discussion Table STDT1 Altered expression of TFs used in this study

## Sheet: Table S1
Supplementary Table introduction STXI1 Altered expression of longnon-codingRNA by different viruses other than SARS-CoV-2
Virus	LncRNA	Alteration	Neighboring coding gene (Possible target)	IFN /ISG regulation	Possible function/comment	Reference
Dengueversus	ENSG00000254680 (novel transcript)	Decreased	Not known	Not known	ROC curves indicate that the accuracy of the test based on the two lncRNAs is very high (AUC > 89%) when comparing viral infection against healthy controls	[17]
Dengueversus	ENSG00000273149 (novel transcript, antisense to TPT1)	Decreased	Not known	Not known	ROC curves indicate that the accuracy of the test based on the two lncRNAs is very high (AUC > 89%) when comparing viral infection against healthy controls	[17]
EMCV	lncRNA32/LUARIS (lncRNA upregulator of antiviral response interferon signaling)	Increase	HECW1, hnRNPU, ATF2	Regulates expression of ISG genes	Two lncRNA codes from HECW1:intronic HECW1-IT1 (in the same direction) and LUARIS (opposite strand). Likely to regulate viral infection through ISG	Reviewed in [1]
Enterovirus/coxsakievirus	ENSG00000254680 (novel transcript)	Decreased	Not known	Not known	ROC curves indicate that the accuracy of the test based on the two lncRNAs is very high (AUC > 89%) when comparing viral infection against healthy controls	[17]
Enterovirus/coxsakievirus	ENSG00000273149 (novel transcript, antisense to TPT1)	Decreased	Not known	Not known	ROC curves indicate that the accuracy of the test based on the two lncRNAs is very high (AUC > 89%) when comparing viral infection against healthy controls	[17]
Enterovirus71 (EV71)	lncRNA-AK097647 (not in NCBI gene)	Increase	Not known	Knockdown of the lncRNA increased the expression of IFNL1/IFN-λ1	Knockdown of the lncRNA suppressed of EV71 replication	[31]
Hantaanvirus (HTNV)	NEAT1	Increase	RIG-1, DDX60	Accelerated robust IFN responses by binding to the promoter of IFNB and increasing the expression	Overexpression reduces HTNV replication. HTNV infection activated NEAT1 transcription through the RIG-I-IRF7 pathway, whereas NEAT1 removed the transcriptional inhibitory effects of the splicing factor proline- and glutamine-rich protein (SFPQ) by relocating SFPQ to paraspeckles, thus promoting the expression of RIG-I and DDX60. NEAT1 silencing affects innate immune responses after HTNV infection…	[10]
HBV	lncRNA32/LUARIS (lncRNA upregulator of antiviral response interferon signaling)	Increase	HECW1, hnRNPU, ATF2	Regulates expression of ISG genes	Two lncRNA codes from HECW1:intronic HECW1-IT1 (in the same direction) and LUARIS (opposite strand). Likely to regulate viral infection through ISG	Reviewed in [1]
HBV	LNCRNA-ATB	Increase or decrease depending on presence of cirrhosis	Regulator of TGF-β signaling pathway	Not known	Increased in plasma of patients with HBV related cirrhosis, decreased in HBV infected but without cirrhosis, compared to healthy control.	[19]
HBV	FAM85B/lncRNA-HEIM	Increase	Correlate with expression of TGF-β and SMAD4	Not known	Altering endogenous lncRNA-HEIM level in monocytes significantly affected production fibrosis of hepatic stellate cells in model system	[26]
HBV	GAS5	Decrease (CHB infection in patients)	Not known	Not known	GAS5 is regulated by promoter methylation	[28]
HBV	XIST	Increase	miR-192 that targets TRIM25	Not known	Not known	[32]
HBV	HOTAIR	Increase	Not known	Not known	HOTAIR promoted HBV transcription and replication by elevating the activities of HBV promoters via modulation of SP1	[37]
HBV	HOTTIP	Increase	HBV DNA polymerase (DNA pol) binds to and stabilizes CREB1 mRNA to facilitate translation of the protein. CREB1 then binds to the regulatory element of HOTTIP to promote its expression.	Not known	HOTTIP significantly suppresses the generation of hepatitis B viral surface antigen, hepatitis B viral e antigen and HBV replication	[41]
HCV	lncRNA32/LUARIS (lncRNA upregulator of antiviral response interferon signaling)	Increase	HECW1, hnRNPU, ATF2	Regulates expression of ISG genes	Two lncRNA codes from HECW1:intronic HECW1-IT1 (in the same direction) and LUARIS (opposite strand). Likely to regulate viral infection through ISG	Reviewed in [1]
HCV	NRIR/lncCMPK2 (negative regulator of interferon response)	Increase	CMPK2	Negatively the IFN responses	It regulates and enhances virus replication	Reviewed in [1] and [2]
HCV	lncBST2/BISPR	Increase	BST2	Negatively the IFN responses	May inhibits viral release by modulating JAK-STAT pathway stabilizing BST2/TETHERIN protein like IAV	Reviewed in [1] and [2]
HCV	EGOT (eosinophil granule ontogeny transcript)	Increase	Not known	Regulates expression ofISGs	Promotes viral replication	Reviewed in [1] and [2]
HCV	GAS5	Increase	Interacts with NS3 of HCV	Not known	Inhibits HCV replication	Reviewed in [1] and [2]
HCV	NRIR/lncCMPK2 (negative regulator of interferon response)	Increase	CMPK2	Regulates negatively the IFN responses	Enhances virus replication	Reviewed in [1]
HCV	UCA1	Increased	Targets suppressor of cytokine signaling 7 (SOCS7) mRNA through miR-145-5p	UCA1 knockdown upregulated IFN responses, increasing the expression of ISGs	Knock down suppressing HCV replication	[18]
HCV	LINC-PINT	Decrease	Interacts with DDX24, enabling RIP1 to interact with IRF7 of IFN signaling pathway	The lncRNA significantly upregulates IFNA and IFNB	LINC-PINT is a positive regulator of host innate immune responses, specially IFN signaling	[27]
HCV	HOTAIRM1	Increase	miR-124, HOXA1	Not known	Ectopic expression of HOTAIRM1 or HOXA1 could induce myeloid-derived suppressor cells (MDSCs) development to suppress T cell functions	[36]
HCV	HULC/LINC00078	Increase	Not known	Not stimulated by IFN	HULC expression is increased by HCV infection, knockdown of the lncRNA Suppresses HCV Replication, HULC also regulates HCV translation	[40]
HCV	CFAP58-DT/lncITPRIP-1	Increase	Not known	Not known	Not known	Reviewed [1]
HCV	ISR (IFN-stimulated lncRNA)2, GBP1 pseudogene 1	Increase	GBP1, IRF1, and IL-6 (near by gene)	Treatment with IFN induces the lncRNA	Not known	Reviewed in [42]
HCV	ISR8 (AC116366.6)	Increase	GBP1, IRF1, and IL-6 (near by gene)	Treatment with IFN induces the lncRNA	Bioinformatics analysis showed that STAT1 and 2 as well as IRF1 and 2 may bind to the promoter of ISR8 and impact on its transcription	Reviewed in [42]
HCV	CFAP58-DT/lncITPRIP-1	Increase	ITPRIP (neighbouring gene), binds to the c-terminal of MDA5	Induce by IFN	Over-expression of this lncRNA significantly inhibited HCV replication	Reviewed in [42]
HIV	NRON (non-coding repressor of NFAT)	Decrease	MVB12B	Not known	Depletion and overexpression of MVB12B, one of the components of ESCRT-I complex involves in HIV budding and endosomal protein sorting, inhibit HIV-1 infectivity and induce unusual viral assembly defects	Reviewed in [1]
HIV	NEAT1	Increase	FRMD8, MIR612	Not known	NEAT1 serves as a structural scaffold for the formation of nuclear paraspeckles; facilitates the expression of antiviral genes including cytokines such as IL-8 by cooperative action of NEAT1 and SFPQ	Reviewed in [1]
HIV	NRIR/lncCMPK2	Increase	CMPK2	Induced by IFNA, IFNG, IFNE	Not known	[22]
HIV	MIR3945HG	Increase	Not known	Induced by IFNA, IFNG, IFNE	Not known	[22]
HIV	FIRRE	Increase	Not known	Induced by IFNA, IFNG, IFNE	Not known	[22]
HIV	LINC02574	Increase	Not known	Induced by IFNA, IFNG, IFNE	Not known	[22]
HIV	LINC01426	Increase	Not known	Induced by IFNA, IFNG, IFNE	LINC01426 enhanced HIV-1 replication in a post-transcriptional manner	reviwed [23]
HIV	lincRNA-p21/TP53COR1	Decrease	hnRNP-K	Not known	Modulates macrophage apoptosis	reviwed [23]
HIV	GAS5	Decrease	miR-873	Not known	High levels of GAS5 decreased HIV-1 transcription, while a knockdown of GAS5 resulted in an increase in HIV-1 transcription	reviwed [23]
HIV	FAS-AS1	Increase in macrophage		Not known	FAS-AS1 appears to prevent apoptosis in macrophages infected with HIV-1	reviwed [23]
HIV	NRON	Reduced by the early viral accessory protein Nef and increased by the late protein	Nef, Vpu (viral protein), Nef and Vpu reciprocally affect NFAT	Not known	NRON enhanced HIV-1 replication through increased activity of NFAT and the viral LTR	reviwed [23]
HIV	LINC00173	Decrease	Not known	Not known	No effect on viral replication	reviwed [23]
HIV	MALAT1	MALAT1 was highly expressed in activated T cells compared to un-activated T cells		Not known	Increased HIV-1 transcription, through altering the epigenetic status of the HIV-1 promoter.	reviwed [23]
HIV	RUNX1 overlapping RNA (RUNXOR)	Increase	Not known	Loss of RUNXOR-RUNX1 function in MDSCs improved IFNG production	Silencing RUNXOR or RUNX1 expression in myeloid-derived suppressor cells (MDSCs) from people living with HIV (PLHIV) attenuated MDSC expansion and immunosuppressive mediator expressions, whereas overexpressing RUNXOR in CD33+ myeloid precursors from healthy subjects promoted their differentiation into MDSCs and enhanced the expression of these mediators	[33]
HIV	ENST00000594721/uc061cts.1	Increase	FCAR	Not known	Not known	[34]
HIV	ENST00000602478	Increase	CYB5R3	Not known	Not known	[34]
HIV	ENST00000564481/antisense to AP3M2	Decrease	AP3M2	Not known	Not known	[34]
HIV	ENST00000566814/TFIP11-DT	Decrease	SEZ6L	Not known	Not known	[34]
HIV	GAS5	Decrease	miR-21	Not known	Modulates CD4 T cell response and apoptosis	[35]
HIV	HOTAIRM1	Increase	Not known	Not known	Overexpression of HOTAIRM1 or HOXA1 in CD33+ cells isolated from healthy individuals promoted the differentiation and suppressive functions of Myeloid-derived suppressor cells (MDSCs), whereas silencing of HOTAIRM1 or HOXA1 expression in MDSCs derived from PLHIV significantly inhibited the frequency of MDSCs and expressions of the immunosuppressive molecules and reduced their immunosuppressive ef…	[38]
HIV	CCR5AS	Genetic association with HIV	RALY/HNRPCL2	Not known	Reduction in CCR5 expression through inhibition of CCR5AS diminished infection of CD4+ T cells with CCR5-tropic HIV in vitro.	[39]
HIV	ISR (IFN-stimulated lncRNA)2, GBP1 pseudogene 1	Increase	GBP1, IRF1, and IL-6 (near by gene)	Treatment with IFN induces the lncRNA	Not known	Reviewed in [42]
HIV	BIC/MIR155HG	Increase	Not known	Not known	Not known	[4]
HIV	MALAT1	Increase	Not known	Not known	Not known	[4]
HIV	NEAT1	Increase	Not known	Not known	Knockdown of NEAT1 enhances HIV-1 production by facilitating the nucleus-to-cytoplasm export of Rev-dependent instability element-containing HIV-1 mRNA	[4]
HIV	EGOT/EGO	Increase	Not known	Not known	Not known	[4]
HIV	GOMAFU/MIAT	Increase	Not known	Not known	Not known	[4]
HIV	LUST/RBM5-AS1	Increase	Not known	Not known	Not known	[4]
HIV	PANDAR/PAND	Decrease	Not known	Not known	Not known	[4]
HIV	CDKN2B-AS1/ANRIL	Decrease	Not known	Not known	Not known	[4]
HIV	DD3/PCA	Decrease	Not known	Not known	Not known	[4]
HIV	CMPD/LINC0115	Decrease	Not known	Not known	Not known	[4]
HIV	NCRMS/RMST	Decrease	Not known	Not known	Not known	[4]
HIV	SAF/FAS-AS1	Decrease	Not known	Not known	Not known	[4]
HSV	NEAT1	Increase	FRMD8, MIR612	Not known	NEAT1 serves as a structural scaffold for the formation of nuclear paraspeckles; facilitates the expression of antiviral genes including cytokines such as IL-8 by cooperative action of NEAT1 and SFPQ	Reviewed in [1]
HSV	PRINS (psoriasis associated non-protein coding RNA induced by stress)	Increase	Not known	Not known	Silencing of PRINS by RNA interference decreased cell viability after serum starvation but not under normal serum conditions.	[5]
HSV	Interferon (IFN)-stimulated lncRNA ISR (ISR lncRNA) (MN397203)	Increase	Not known	Not known	Not known	[11]
HSV	CFAP58-DT/lncITPRIP-1	Increase	ITPRIP (neighbouring gene), binds to the c-terminal of MDA5	Induce by IFN	Not known	Reviewed in [42]
HSV	MAMDC2-AS1	Increase	IE genes coded by HSV-1, Hsp90α	Not known	MAMDC2-AS1 is activated by host transcription factor and regulates IE gene coded by HSV-1 through interaction with Hsp90α and mediating nuclear transport of viral protein VP16. VP16 is the core factor that initiates expression of HSV-1 IE genes.	[3]
HSV	LOC102637961/lncRNA-ACOD1	Increase	Acod1, GOT-2	Not known	Knockdown of the lncRNA reduces VSV burden in macrophages	[6]
HSV	lnc-Lsm3b (not in NCBI)	Increase	Not known	Not known	Not known	[25]
IAV	NRAV/ DYNLL1-AS1(negative regulator of antiviral response)	Decrease	DYNLL1	Regulates ISGs	Replication and virulence of IAV negatively regulates expression of IFN-stimulated genes (ISGs) like IFITM3 and MxA through histone modifications	Reviewed in [1] and [2]
IAV	lncBST2/BISPR	Increase	BST2	Negatively the IFN responses	Inhibits viral release by modulating JAK-STAT pathway stabilizing BST2/TETHERIN protein	Reviewed in [2]		`
IAV	NEAT1	Increase	FRMD8, MIR612	Not known	NEAT1 serves as a structural scaffold for the formation of nuclear paraspeckles; facilitates the expression of antiviral genes including cytokines such as IL-8 by cooperative action of NEAT1 and SFPQ	Reviewed in [1]
IAV	EGOT (eosinophil granule ontogeny transcript)	Increase	Not known	Regulates expression ofISGs	Promotes viral replication	Reviewed in [1] and [2]
IAV	LOC102637961/lncRNA-ACOD1	Increase	Acod1, GOT-2	Not known	By interacting with GOT-2 promotes viral replication by modulating metabolic pathway	[2, 6]
IAV	lncRNA-IPAN, not in NCBI, could be PKN2-AS1	Increase	Stabilizes viral RNA-dependent RNA polymerase PB1	Independent of IFN	Enhances IAV replication by stabilizing PB1	[7]
IAV	LOC100506319/LINC01988/LncRNA-PAAN	Increase	Interacts with PA protein of IAV	Not known	Normally localized in the cytoplasm, IAV infection increases the proportion of the lncRNA in nucleus. Reduced expression of the lncRNA inhibits IAV replication and also reduces expression of viral gene	[8]
IAV	Interferon (IFN)-stimulated lncRNA ISR (ISR lncRNA) (MN397203)	Increase	Not known	Stimulated by IFN	Increase in response to IAV infection in a mouse model. Knocked down lncRNA ISR in A549 cells enhances IAV replication, over expression reduces the viral replication. Interferon-β (IFNB) treatment induces the expression. Host deficient of IFNAR1 abolishes the expression. Level of IAV-induced lncRNA ISR expression was decreased in RIG-I knockout cells or mouse treated with NF-κB	[11]
IAV	MIR155HG/lncRNA-155	Increase	Destabilize protein tyrosine phosphatase 1B (PTP1B)	Inhibition of PTP1B by lncRNA-155 resulted in higher production of interferon-beta (IFN-β) and several critical interferon-stimulated genes (ISGs)	Reduced expression of MIR155HG in A549 cells diminished antiviral innate immunity against IAV and enhances replication of IAV. In animals, reduction of MIR155HG increased the virulence of the virus	[12]
IAV	TSPOAP1-AS1	Increase	TSPOAP1	Negatively regulates IAV-induced IFNB1 transcription, interferon-sensitive response element activation and downstream interferon-stimulated genes expression.	Overexpression of TSPOAP1-AS1 increases IAV replication. NF-κB signaling acts as a critical factor in the transcription of TSPOAP1-AS1	[13]
IAV	PSMB8-AS1	Increase	PSMB8 and TAP1	IFNB1 induces the lncRNA	Repression of PSMB8-AS1 reduces influenza virus replication	[14]
IAV	PSORS1C3	Increase	POU5F1, HLA-C	IFNB1 induces the lncRNA (Not statistically significant)	Not known	[14]
IAV	ENSG00000254680 (novel transcript)	Decreased	Not known	Not known	ROC curves indicate that the accuracy of the test based on the two lncRNAs is very high (AUC > 89%) when comparing viral infection against healthy controls	[17]
IAV	ENSG00000273149 (novel transcript, antisense to TPT1)	Decreased	Not known	Not known	ROC curves indicate that the accuracy of the test based on the two lncRNAs is very high (AUC > 89%) when comparing viral infection against healthy controls	[17]
IAV	IVRPIE	Increase	hnRNP U	IVRPIE positively regulates the transcription of interferon β1 and several critical interferon-stimulated genes (ISGs), including IRF1, IFIT1, IFIT3, Mx1, ISG15, and IFI44L, by affecting histone modification of these genes	Enforced IVRPIE expression significantly inhibited IAV replication, silencing IVRPIE promoted IAV replication	[20]
IAV	LINC01191/VIN/lnc-ACTR3	Increase	Not known	Not induced by IFNB	Abolition of VIN by RNA interference restricts IAV replication and viral protein synthesis, highlighting the relevance of this lincRNA for productive IAV infection	[21]
IAV	RIG-I-dependent IAV-upregulated noncoding RNA (RDUR), not in NCBI gene	Increase	ILF2 and ILF3	Modulates IFNs and ISGs	Overexpression of RDUR suppressed IAV replication and downregulation of RDUR promoted the virus replication	[29]
IAV	AVAN (not in NCBI)	Increase	FOXO3a promoter, TRIM25 protein	Induces IFN I and ISGs idirectly by modulating RIG-I	Exogenous expression of AVAN significantly alleviated IAV virulence and virus replication in mice and cultured cells	[30]
IAV	ISR (IFN-stimulated lncRNA)2, GBP1 pseudogene 1	Increase	GBP1, IRF1, and IL-6 (near by gene)	Treatment with IFN induces the lncRNA	Not known	Reviewed in [42]
IAV	ISR8 (AC116366.6)	Increase	GBP1, IRF1, and IL-6 (near by gene)	Treatment with IFN induces the lncRNA	Bioinformatics analysis showed that STAT1 and 2 as well as IRF1 and 2 may bind to the promoter of ISR8 and impact on its transcription	Reviewed in [42]
H1N1 virus	PSMB8-AS1	Increase	PSMB8 and TAP1	IFNB1 induces the lncRNA	Repression of PSMB8-AS1 reduces influenza virus replication	[14]
Japanese encephalitis	NEAT1	Increase	FRMD8, MIR612	Not known	NEAT1 serves as a structural scaffold for the formation of nuclear paraspeckles; facilitates the expression of antiviral genes including cytokines such as IL-8 by cooperative action of NEAT1 and SFPQ	Reviewed in [1]
LCMV	Morrbid (mouse), human homologue MIR4435-2HG	Increased	Bcl2l11	Stimulated by IFN I	Modulates the PI3K-AKT signaling pathway	[16]
PRV	Interferon (IFN)-stimulated lncRNA ISR (ISR lncRNA) (MN397203)	Increase	Not known	Not known	Not known	[11]
Rabies virus	NEAT1	Increase	FRMD8, MIR612	Not known	NEAT1 serves as a structural scaffold for the formation of nuclear paraspeckles; facilitates the expression of antiviral genes including cytokines such as IL-8 by cooperative action of NEAT1 and SFPQ	Reviewed in [1]
RSV	MEG3	Decrease	Not known	Not known	Increased TLR4, TNFα and IL-8, NF-κB and p38 MAPK pathways in cultured cells infected with RSV were reversed by over expression of MEG3 indicating protective role of MEG3 in RSV infection.	[15]
RSV	NRAV/DYNLL1-AS1	Decrease	miR-509-3p	Not known	NRAV favors RSV production indirectly by sponging miR-509-3p. Decreased Rab5c along with NRAV reduce the viral entry and intracellular transmission	[2, 9]
RSV	PVT1	Increase (infected rats)	MiR-203a	Not known	Modulates E2F3, a target of miR-203a	[24]
RSV	BCYRN1	Increase (infected rats)	Not known	Not known	Not known	[24]
RSV	GAS5	Increase (infected rats)	Not known	Not known	Not known	[24]
Norovirus/adenovirus	ENSG00000254680 (novel transcript)	Decreased	Not known	Not known	ROC curves indicate that the accuracy of the test based on the two lncRNAs is very high (AUC > 89%) when comparing viral infection against healthy controls	[17]
Norovirus/adenovirus	ENSG00000273149 (novel transcript, antisense to TPT1)	Decreased	Not known	Not known	ROC curves indicate that the accuracy of the test based on the two lncRNAs is very high (AUC > 89%) when comparing viral infection against healthy controls	[17]
RV	ENSG00000254680 (novel transcript)	Decreased	Not known	Not known	ROC curves indicate that the accuracy of the test based on the two lncRNAs is very high (AUC > 89%) when comparing viral infection against healthy controls	[17]
RV	ENSG00000273149 (novel transcript, antisense to TPT1)	Decreased	Not known	Not known	ROC curves indicate that the accuracy of the test based on the two lncRNAs is very high (AUC > 89%) when comparing viral infection against healthy controls	[17]
Semliki Forestvirus	EGOT (eosinophil granule ontogeny transcript)	Increase	Not known	Regulates expression ofISGs	Promotes viral replication	Reviewed in [1] and [2]
SeV	Interferon (IFN)-stimulated lncRNA ISR (ISR lncRNA) (MN397203)	Increase	Not known	Not known	Not known	[11]
SeV	CFAP58-DT/lncITPRIP-1	Increase	ITPRIP (neighbouring gene), binds to the c-terminal of MDA5	Induce by IFN	Not known	Reviewed in [42]
Theiler'svirus	NeST/IFNG-AS1	Increase	IFN-γ, WDR5	Regulates IFNG expression	Inhibits clearance Theiler's virus . Interacts with WDR5 modifies methylation of histone 3 at the promoter of IFN-γ	Reviewed in [1] and [2]
VACV	LOC102637961/lncRNA-ACOD1	Increase	Acod1, GOT-2	Not known	Knockdown of the lncRNA reduces VSV burden in macrophages	[6]
VSV	lncBST2/BISPR	Increase	BST2	Negatively the IFN responses	May inhibits viral release by modulating JAK-STAT pathway stabilizing BST2/TETHERIN protein like IAV	Reviewed in [1] and [2]
VSV	LOC102637961/lncRNA-ACOD1	Increase	Acod1, GOT-2	VSV infection induces the lncRNA independent of IFN I but depends on NF-κB pathway dependent way	Knockdown of the lncRNA reduces VSV burden in macrophages	[6]
VSV	LINC01191/VIN/lnc-ACTR3	Increase	Not known	Not induced by IFNB	Not known	[21]
VSV	lnc-Lsm3b (not in NCBI)	Increase	RIG-I	Deficiency of lnc-Lsm3b specifically enhances RIG-I-initiated IFN production	Acts as a decoy for RIG-I and prevents downstream signaling	[25]
VSV	CFAP58-DT/lncITPRIP-1	Increase	ITPRIP (neighbouring gene), binds to the c-terminal of MDA5	Induce by IFN	Not known	Reviewed in [42]
Abbreviations
Enterovirus71: EV71
Hantaanvirus: HTNV
Hepatitis B virus HBV
Hepatitis C virus: HCV
Herpes Simplex Virus: HSV
Human immunodeficiency virus: HIV
Influenza H1N1 virus: H1N1
Influenza virus: IAV
Lymphocytic choriomeningitis virus: LCMV
Pseudo rabies virus: PRV
Respiratory syncytial virus: RSV
Rotavirus: RV
Sendaivirus: SeV
Severe acute respiratory syndrome coronavirus: SARS-CoV
Vaccinia virus: VACV
Vesicular stomatitis virus:VSV
References
[1]LiuW,DingC.RolesofLncRNAsinViralInfections.FrontCellInfectMicrobiol.2017May26;7:205.doi:10.3389/fcimb.2017.00205.PMID:28603696;PMCID:PMC5445353.
[2]KeshehMM,MahmoudvandS,ShokriS.LongnoncodingRNAsinrespiratoryviruses:Areview.RevMedVirol.2021Jul12:e2275.doi:10.1002/rmv.2275.Epubaheadofprint.PMID:34252234.
[3]WangY,HuangL,WangY,LuoW,LiF,XiaoJ,QinS,WangZ,SongX,WangY,JinF,WangY.Single-cellRNA-sequencinganalysisidentifieshostlongnoncodingRNAMAMDC2-AS1asaco-factorforHSV-1nucleartransport.IntJBiolSci.2020Mar5;16(9):1586-1603.doi:10.7150/ijbs.42556.PMID:32226304;PMCID:PMC7097924.
[4]ZhangQ,ChenCY,YedavalliVS,JeangKT.NEAT1longnoncodingRNAandparaspecklebodiesmodulateHIV-1posttranscriptionalexpression.mBio.2013Jan29;4(1):e00596-12.doi:10.1128/mBio.00596-12.PMID:23362321;PMCID:PMC3560530.
[5]SonkolyE,Bata-CsorgoZ,PivarcsiA,PolyankaH,Kenderessy-SzaboA,MolnarG,SzentpaliK,BariL,MegyeriK,MandiY,DobozyA,KemenyL,SzellM.Identificationandcharacterizationofanovel,psoriasissusceptibility-relatednoncodingRNAgene,PRINS.JBiolChem.2005Jun24;280(25):24159-67.doi:10.1074/jbc.M501704200.Epub2005Apr26.PMID:15855153.
[6]WangP,XuJ,WangY,CaoX.Aninterferon-independentlncRNApromotesviralreplicationbymodulatingcellularmetabolism.Science.2017Nov24;358(6366):1051-1055.doi:10.1126/science.aao0409.Epub2017Oct26.PMID:29074580.
[7]WangJ,ZhangY,LiQ,ZhaoJ,YiD,DingJ,ZhaoF,HuS,ZhouJ,DengT,LiX,GuoF,LiangC,CenS.InfluenzaVirusExploitsanInterferon-IndependentlncRNAtoPreserveViralRNASynthesisthroughStabilizingViralRNAPolymerasePB1.CellRep.2019Jun11;27(11):3295-3304.e4.doi:10.1016/j.celrep.2019.05.036.PMID:31189112.
[8]WangJ,WangY,ZhouR,ZhaoJ,ZhangY,YiD,LiQ,ZhouJ,GuoF,LiangC,LiX,CenS.HostLongNoncodingRNAlncRNA-PAANRegulatestheReplicationofInfluenzaAVirus.Viruses.2018Jun16;10(6):330.doi:10.3390/v10060330.PMID:29914164;PMCID:PMC6024364.
[9]LiJ,LiM,WangX,SunM,MaC,LiangW,GaoX,WeiL.LongNoncodingRNANRAVPromotesRespiratorySyncytialVirusReplicationbyTargetingtheMicroRNAmiR-509-3p/Rab5cAxisToRegulateVesicleTransportation.JVirol.2020May4;94(10):e00113-20.doi:10.1128/JVI.00113-20.PMID:32102886;PMCID:PMC7199404.
[10]MaH,HanP,YeW,ChenH,ZhengX,ChengL,ZhangL,YuL,WuX,XuZ,LeiY,ZhangF.TheLongNoncodingRNANEAT1ExertsAntihantaviralEffectsbyActingasPositiveFeedbackforRIG-ISignaling.JVirol.2017Apr13;91(9):e02250-16.doi:10.1128/JVI.02250-16.PMID:28202761;PMCID:PMC5391460
[11]PanQ,ZhaoZ,LiaoY,ChiuSH,WangS,ChenB,ChenN,ChenY,ChenJL.IdentificationofanInterferon-StimulatedLongNoncodingRNA(LncRNAISR)InvolvedinRegulationofInfluenzaAVirusReplication.IntJMolSci.2019Oct16;20(20):5118.doi:10.3390/ijms20205118.PMID:31623059;PMCID:PMC6829313.
[12]MaaroufM,ChenB,ChenY,WangX,RaiKR,ZhaoZ,LiuS,LiY,XiaoM,ChenJL.IdentificationoflncRNA-155encodedbyMIR155HGasanovelregulatorofinnateimmunityagainstinfluenzaAvirusinfection.CellMicrobiol.2019Aug;21(8):e13036.doi:10.1111/cmi.13036.Epub2019May29.PMID:31045320.
[13]WangQ,ZhangD,FengW,GuoY,SunX,ZhangM,GuanZ,DuanM.LongnoncodingRNATSPOAP1antisenseRNA1negativelymodulatestypeIIFNsignalingtofacilitateinfluenzaAvirusreplication.JMedVirol.2019Apr10.doi:10.1002/jmv.25483.Epubaheadofprint.PMID:30968963.
[14]MoreS,ZhuZ,LinK,HuangC,PushparajS,LiangY,SathiaseelanR,YangX,LiuL.Longnon-codingRNAPSMB8-AS1regulatesinfluenzavirusreplication.RNABiol.2019Mar;16(3):340-353.doi:10.1080/15476286.2019.1572448.Epub2019Jan28.PMID:30669933;PMCID:PMC6380333.
[15]TaoXW,ZengLK,WangHZ,LiuHC.LncRNAMEG3amelioratesrespiratorysyncytialvirusinfectionbysuppressingTLR4signaling.MolMedRep.2018Mar;17(3):4138-4144.doi:10.3892/mmr.2017.8303.Epub2017Dec18.PMID:29257348.
[16]KotzinJJ,IsekaF,WrightJ,BasavappaMG,ClarkML,AliMA,Abdel-HakeemMS,RobertsonTF,MowelWK,JoannasL,NealVD,SpencerSP,SyrettCM,AngueraMC,WilliamsA,WherryEJ,Henao-MejiaJ.ThelongnoncodingRNAMorrbidregulatesCD8Tcellsinresponsetoviralinfection.ProcNatlAcadSciUSA.2019Jun11;116(24):11916-11925.doi:10.1073/pnas.1819457116.Epub2019May28.PMID:31138702;PMCID:PMC6575676.
[17]Barral-ArcaR,Gómez-CarballaA,Cebey-LópezM,Currás-TualaMJ,PischeddaS,Viz-LasherasS,BelloX,Martinón-TorresF,SalasA.RNA-SeqData-MiningAllowstheDiscoveryofTwoLongNon-CodingRNABiomarkersofViralInfectioninHumans.IntJMolSci.2020Apr15;21(8):2748.doi:10.3390/ijms21082748.PMID:32326627;PMCID:PMC7215422
[18]ZengH,LiL,GaoY,WuG,HouZ,LiuS.LongnoncodingRNAUCA1regulatesHCVreplicationandantiviralresponseviamiR-145-5p/SOCS7/IFNpathway.IntJBiolSci.2021Jul5;17(11):2826-2840.doi:10.7150/ijbs.59227.PMID:34345210;PMCID:PMC8326114
[19]ShorakaS,MohebbiSR,HosseiniSM,AsadzadehAghdaeiH,ZaliMR.IdentificationofplasmalncRNA-ATBlevelsinhepatitisBvirus-relatedcirrhosisandnon-cirrhoticchronichepatitisBpatients.VirusRes.2021Jul28;303:198503.doi:10.1016/j.virusres.2021.198503.Epubaheadofprint.PMID:34331990.
[20]ZhaoL,XiaM,WangK,LaiC,FanH,GuH,YangP,WangX.ALongNon-codingRNAIVRPIEPromotesHostAntiviralImmuneResponsesThroughRegulatingInterferonβ1andISGExpression.FrontMicrobiol.2020Feb20;11:260.doi:10.3389/fmicb.2020.00260.PMID:32153544;PMCID:PMC7044153
[21]WinterlingC,KochM,KoeppelM,Garcia-AlcaldeF,KarlasA,MeyerTF.Evidenceforacrucialroleofahostnon-codingRNAininfluenzaAvirusreplication.RNABiol.2014;11(1):66-75.doi:10.4161/rna.27504.Epub2013Dec20.PMID:24440876;PMCID:PMC3929426
[22]SchynkelT,SzaniawskiMA,SpivakAM,BosqueA,PlanellesV,VandekerckhoveL,TrypsteenW.Interferon-MediatedLongNon-CodingRNAResponseinMacrophagesintheContextofHIV.IntJMolSci.2020Oct19;21(20):7741.doi:10.3390/ijms21207741.PMID:33086748;PMCID:PMC7589721.
[23]RayRM,MorrisKV.LongNon-codingRNAsMechanismsofActioninHIV-1ModulationandtheIdentificationofNovelTherapeuticTargets.NoncodingRNA.2020Mar13;6(1):12.doi:10.3390/ncrna6010012.PMID:32183241;PMCID:PMC7151623.
[24]YuX,ZheZ,TangB,LiS,TangL,WuY,ChenX,FangH.α-AsaronesuppressestheproliferationandmigrationofASMCsthroughtargetingthelncRNA-PVT1/miR-203a/E2F3signalpathwayinRSV-infectedrats.ActaBiochimBiophysSin(Shanghai).2017Jul1;49(7):598-608.doi:10.1093/abbs/gmx048.PMID:28510638.
[25]JiangM,ZhangS,YangZ,LinH,ZhuJ,LiuL,WangW,LiuS,LiuW,MaY,ZhangL,CaoX.Self-RecognitionofanInducibleHostlncRNAbyRIG-IFeedbackRestrictsInnateImmuneResponse.Cell.2018May3;173(4):906-919.e13.doi:10.1016/j.cell.2018.03.064.Epub2018Apr26.
[26]YaoJ,LinC,JiangJ,ZhangX,LiF,LiuT,DiaoH.lncRNA-HEIMFacilitatedLiverFibrosisbyUp-RegulatingTGF-βExpressioninLong-TermOutcomeofChronicHepatitisB.FrontImmunol.2021Jun8;12:666370.doi:10.3389/fimmu.2021.666370.PMID:34168644;PMCID:PMC8217658.
[27]KhatunM,ZhangJ,RayR,RayRB.HepatitisCvirusevadesIFNsignalingbysuppressinglongnon-codingRNALinc-Pintinvolvingc/EBP-β.JVirol.2021Jun23:JVI0095221.doi:10.1128/JVI.00952-21.Epubaheadofprint.PMID:34160260.
[28]GuoY,LiC,ZhangR,ZhanY,YuJ,TuJ,ZhengJ.Epigenetically-regulatedserumGAS5asapotentialbiomarkerforpatientswithchronichepatitisBvirusinfection.CancerBiomark.2021May28.doi:10.3233/CBM-203169.Epubaheadofprint.PMID:34092613.
[29]ChenY,HuJ,LiuS,ChenB,XiaoM,LiY,LiaoY,RaiKR,ZhaoZ,OuyangJ,PanQ,ZhangL,HuangS,ChenJL.RDUR,alncRNA,PromotesInnateAntiviralResponsesandProvidesFeedbackControlofNF-κBActivation.FrontImmunol.2021May14;12:672165.doi:10.3389/fimmu.2021.672165.PMID:34054851;PMCID:PMC8160526.
[30]LaiC,LiuL,LiuQ,WangK,ChengS,ZhaoL,XiaM,WangC,DuanY,ZhangL,LiuZ,LuoJ,WangX,ChenR,YangP.LongnoncodingRNAAVANpromotesantiviralinnateimmunitybyinteractingwithTRIM25andenhancingthetranscriptionofFOXO3a.CellDeathDiffer.2021May14.doi:10.1038/s41418-021-00791-2.Epubaheadofprint.PMID:33990776.
[31]ChuM,ZhouB,TuH,LiM,HuangL,HeY,LiuL,HanS,YinJ,PengB,HeX,LiuW.TheUpregulationofaNovelLongNoncodingRNAAK097647PromotesEnterovirus71ReplicationandDecreasesIFN-λ1Secretion.Intervirology.2021;64(3):147-155.doi:10.1159/000515903.Epub2021May5.PMID:33951637
[32]WangJ,YinG,BianH,YangJ,ZhouP,YanK,LiuC,ChenP,ZhuJ,LiZ,XueT.LncRNAXISTupregulatesTRIM25vianegativelyregulatingmiR-192inhepatitisBvirus-relatedhepatocellularcarcinoma.MolMed.2021Apr15;27(1):41.doi:10.1186/s10020-021-00278-3.PMID:33858324;PMCID:PMC8050905.
[33]ZhangJ,ThakuriBKC,ZhaoJ,NguyenLN,NguyenLNT,KhanalS,CaoD,DangX,SchankM,LuZ,WuXY,MorrisonZD,ElGazzarM,JiangY,NingS,WangL,MoormanJP,YaoZQ.LongNoncodingRNARUNXORPromotesMyeloid-DerivedSuppressorCellExpansionandFunctionsviaEnhancingImmunosuppressiveMoleculeExpressionsduringLatentHIVInfection.JImmunol.2021May1;206(9):2052-2060.doi:10.4049/jimmunol.2001008.Epub2021Apr5.PMID:33820854
[34]MaL,ZhangH,ZhangY,LiH,AnM,ZhaoB,DingH,XuJ,ShangH,HanX.IntegratedanalysisoflncRNA,miRNAandmRNAprofilesrevealspotentiallncRNAfunctionsduringearlyHIVinfection.JTranslMed.2021Apr1;19(1):135.doi:10.1186/s12967-021-02802-9.PMID:33794921;PMCID:PMC8015739
[35]NguyenLNT,NguyenLN,ZhaoJ,SchankM,DangX,CaoD,KhanalS,ChandThakuriBK,LuZ,ZhangJ,LiZ,MorrisonZD,WuXY,ElGazzarM,NingS,WangL,MoormanJP,YaoZQ.LongNon-codingRNAGAS5RegulatesTCellFunctionsviamiR21-MediatedSignalinginPeopleLivingWithHIV.FrontImmunol.2021Mar12;12:601298.doi:10.3389/fimmu.2021.601298.PMID:33776993;PMCID:PMC7994762.
[36]ThakuriBKC,ZhangJ,ZhaoJ,NguyenLN,NguyenLNT,KhanalS,CaoD,DangX,SchankM,WuXY,MorrisonZD,GazzarME,LiZ,JiangY,NingS,WangL,MoormanJP,YaoZQ.LncRNAHOTAIRM1promotesMDSCexpansionandsuppressivefunctionsthroughtheHOXA1-miR124axisduringHCVinfection.SciRep.2020Dec16;10(1):22033.doi:10.1038/s41598-020-78786-1.PMID:33328510;PMCID:PMC7745042.
[37]RenF,RenJH,SongCL,TanM,YuHB,ZhouYJ,QinYP,ChengST,ZhangY,HuangAL,ChenJ,YangX.LncRNAHOTAIRmodulateshepatitisBvirustranscriptionandreplicationbyenhancingSP1transcriptionfactor.ClinSci(Lond).2020Nov27;134(22):3007-3022.doi:10.1042/CS20200970.PMID:33103728.
[38]ZhangJ,ThakuriBKC,ZhaoJ,NguyenLN,NguyenLNT,CaoD,DangX,KhanalS,SchankM,LuZ,WuXY,MorrisonZD,GazzarME,LiZ,JiangY,NingS,WangL,MoormanJP,YaoZQ.LongnoncodingRNAHOTAIRM1promotesmyeloid-derivedsuppressorcellexpansionandsuppressivefunctionsthroughup-regulatingHOXA1expressionduringlatentHIVinfection.AIDS.2020Dec1;34(15):2211-2221.doi:10.1097/QAD.0000000000002700.PMID:33048872;PMCID:PMC7674250.
[39]KulkarniS,LiedA,KulkarniV,RucevicM,MartinMP,Walker-SperlingV,AndersonSK,EwyR,SinghS,NguyenH,McLarenPJ,ViardM,NaranbhaiV,ZouC,LinZ,GatanagaH,OkaS,TakiguchiM,ThioCL,MargolickJ,KirkGD,GoedertJJ,HootsWK,DeeksSG,HaasDW,MichaelN,WalkerB,LeGallS,ChowdhuryFZ,YuXG,CarringtonM.CCR5ASlncRNAvariationdifferentiallyregulatesCCR5,influencingHIVdiseaseoutcome.NatImmunol.2019Jul;20(7):824-834.doi:10.1038/s415…
[40]KitabayashiJ,ShirasakiT,ShimakamiT,NishiyamaT,WelschC,FunakiM,MuraiK,SumiyadorjA,TakatoriH,KitamuraK,KawaguchiK,AraiK,YamashitaT,SakaiY,YamashitaT,MizukoshiE,HondaM,KanekoS;HokurikuLiverStudyGroup.UpregulationoftheLongNon-CodingRNAHULCbyHepatitisCVirusanditsRegulationofViralReplication.JInfectDis.2020Jun9:jiaa325.doi:10.1093/infdis/jiaa325.Epubaheadofprint.PMID:32515477.
[41]ZhaoX,FanH,ChenX,ZhaoX,WangX,FengY,LiuM,LiS,TangH.HepatitisBVirusDNAPolymeraseRestrainsViralReplicationThroughtheCREB1/HOXADistalTranscriptAntisenseRNAHomeoboxA13Axis.Hepatology.2021Feb;73(2):503-519.doi:10.1002/hep.31284.PMID:32314410.
[42]QiuL,WangT,TangQ,LiG,WuP,ChenK.LongNon-codingRNAs:RegulatorsofViralInfectionandtheInterferonAntiviralResponse.FrontMicrobiol.2018Jul19;9:1621.doi:10.3389/fmicb.2018.01621.PMID:30072977;PMCID:PMC6060254.	`

## Sheet: Table S2 - S5
Supplementary Table introduction STXI2A Altered expression of longnon-coding RNA in cells infected withSARS-CoV-2 and different tissues from COVID-19 patients															Supplementary Table introduction STXI2B Altered expression of long non-coding RNA in SARS-CoV-2 infected cells only in one experiment										Supplementary Table introduction STXI2C Altered.expression of long non-coding RNA in more than one experimes																Supplementary Table introduction STXI2D Altered expression of long non-coding RNA in more than one experimes but in opposite direction
LncRNA	Alterations	Patients/healthy normal	Tissue/cells	Expression ID	Nature of experiments	Comments	Key result	References							LncRNA	Alterations	References		Decreased in a single study		Increased in a single study				LncRNA	Alterations	References		Unique decreased in more than one study		Unique increased in more than one study			LncRNA	Alterations	References	Comment				LncRNA	Alterations	References
SNHG6	Decrease	91 COVID-19 patients (38 females, 53 males) and 91 healthy subjects	Blood	NA	Real time PCR	LncRNA was chosen on the basis of their relation to VDR (vitamin D receptor)		Taheri M et al. 2021							A1BG-AS1	Decrease	Moazzam-Jazi M et al., 2021		A1BG-AS1		ACAP2-IT1				ATP2B1-AS1	Decrease	Moazzam-Jazi M et al., 2021		ATP2B1-AS1		C5orf66			CFLAR-AS1/ENSG00000226312.7	Decrease (BALF)	Mukherjee S et al., 2021	Increased in 2 or more studies				ANKRD44-AS1	Increase	Moazzam-Jazi M et al., 2021
SNHG16	Decrease	91 COVID-19 patients (38 females, 53 males) and 91 healthy subjects	Blood	NA	Real time PCR	LncRNA was chosen on the basis of their relation to VDR (vitamin D receptor)		Taheri M et al. 2021							A2M-AS1	Decrease	Moazzam-Jazi M et al., 2021		A2M-AS1		APTR				ATP2B1-AS1	Decrease (severe vs nonsevere)	Cheng J et al., 2021		BAIAP2-DT		CFLAR-AS1/ENSG00000226312.7			EIF2AK3-DT/ENSG00000234028.3	Decrease (BALF)	Mukherjee S et al., 2021	Increased in 2 or more studies				ANKRD44-AS1	Decrease (COVID-ICU vs COVID NON-ICU )	Shaath H et al., 2021
LASI(antisensestrandtoICAM-1,notcataloguedinNCBIandEnsembldatabase)	Increase	3D human airway tissue model to evaluate innate epithelial cell responses to SARS-CoV-2 infection.	3D epithelial cells infected with SARS-CoV-2	NA	Real time PCR (?)	Gene is not catalogued in NCBI or Ensembl	Higher expression was also observed in high viral load patients. Mucoinflammatory signature with elevated expression of IL-6, ICAM-1, SCGB1A1, SPDEF, MUC5AC, MUC5B , and MUC4	Devadoss D et al., 2021 (pre-print)							AATBC	Decrease (COVID-ICU vs COVID NON-ICU )	Shaath H et al., 2021		AATBC		CCR5AS				BAIAP2-DT	Decrease	Moazzam-Jazi M et al., 2021		C22orf34		EGOT			EPB41L4A-AS1	Decrease (severe vs nonsevere)	Cheng J et al., 2021	Increased in 2 or more studies				DANCR	Increase	Moazzam-Jazi M et al., 2021
TOSL(TNFAIP3-oppositestrandlncRNA,notcataloguedinNCBIandEnsembldatabase	Increase	3D human airway tissue model to evaluate innate epithelial cell responses to SARS-CoV-2 infection.	3D epithelial cells infected with SARS-CoV-2	NA	Real time PCR (?)	Gene is not catalogued in NCBI or Ensembl	Higher expression was also observed in high viral load patients. Mucoinflammatory signature with elevated expression of IL-6, ICAM-1, SCGB1A1, SPDEF, MUC5AC, MUC5B , and MUC4	Devadoss D et al., 2021 (pre-print)							ADAMTSL4-AS1	Decrease	Moazzam-Jazi M et al., 2021		ADAMTSL4-AS1		CDKN2B-AS1				BAIAP2-DT	Decrease (severe vs nonsevere)	Cheng J et al., 2021		CHRM3-AS2		EGOT/ENSG00000235947.1			EPB41L4A-AS1/ENSG00000224032.7	Decrease (BALF)	Mukherjee S et al., 2021*	Increased in 2 or more studies				DANCR	Decrease (severe vs nonsevere)	Cheng J et al., 2021
NEAT1	Increase	3D human airway tissue model to evaluate innate epithelial cell responses to SARS-CoV-2 infection.	3D epithelial cells infected with SARS-CoV-2	NA	Real time PCR (?)	Gene is not catalogued in NCBI or Ensembl	Higher expression was also observed in high viral load patients. Mucoinflammatory signature with elevated expression of IL-6, ICAM-1, SCGB1A1, SPDEF, MUC5AC, MUC5B , and MUC4	Devadoss D et al., 2021 (pre-print)							ADORA2A-AS1	Decrease	Moazzam-Jazi M et al., 2021		ADORA2A-AS1		CEBPA-DT				C22orf34	Decrease	Moazzam-Jazi M et al., 2021		HAR1A		EIF2AK3-DT/ENSG00000234028.3			IRF2-DT/ENSG00000271646.1	Decrease (BALF)	Mukherjee S et al., 2021	Increased in 2 or more studies				DLEU1	Increase	Moazzam-Jazi M et al., 2021
A2M-AS1	Decrease	PBMC and BALF (12 patients, 3 healthy control)	PBMC and BALF	Beijing Institute of Genomics (BIG) Data Center (accession number: CRA002390), originally published by Xiong Y et al., 2021	Re-analysis of RNA sequencing data published by Xiong Y et al., 2021		Major findings were (i) more than half of the interactions between lncRNAs‐PCGs of BALF samples established by trans‐acting lncRNA HOTAIRM1 (decreased in BALF), PVT1 (increased in BALF and novel transcript AL392172.1 (not observed in current version Ensembl or NCBI, increased), (ii) binding of several deregulated lncRNAs have been shown to bind with SARS-CoV-2 genome by computational tool; the 5′…	Moazzam-Jazi M et al., 2021							ANKRD10-IT1	Decrease	Moazzam-Jazi M et al., 2021		ANKRD10-IT1		COLCA1				C22orf34	Decrease (severe vs nonsevere)	Cheng J et al., 2021		KDM2B-DT		EPB41L4A-AS1			LINC00106	Increase	Moazzam-Jazi M et al., 2021	Decreased in 2 or more studies				DLEU1	Decrease (severe vs nonsevere)	Cheng J et al., 2021
ADAMTSL4-AS1	Decrease	PBMC	PBMC and BALF	Beijing Institute of Genomics (BIG) Data Center (accession number: CRA002390), originally published by Xiong Y et al., 2021	Re-analysis of RNA sequencing data published by Xiong Y et al., 2021		Major findings were (i) more than half of the interactions between lncRNAs‐PCGs of BALF samples established by trans‐acting lncRNA HOTAIRM1 (decreased in BALF), PVT1 (increased in BALF and novel transcript AL392172.1 (not observed in current version Ensembl or NCBI, increased), (ii) binding of several deregulated lncRNAs have been shown to bind with SARS-CoV-2 genome by computational tool; the 5′…	Moazzam-Jazi M et al., 2021							ARAP1-AS1	Decrease (COVID-non ICU vs Non-COVID-non ICU)	Shaath H et al., 2021		ARAP1-AS1		COX10-AS1				CHRM3-AS2	Decrease	Moazzam-Jazi M et al., 2021		LINC00106		IRF2-DT/ENSG00000271646.1			LINC00265	Decrease (severe vs nonsevere)	Cheng J et al., 2021	Increased in 2 or more studies				EBLN3P	Increase (COVID-non ICU vs Non-COVID-non ICU)	Shaath H et al., 2021
ADORA2A-AS1	Decrease	PBMC	PBMC and BALF	Beijing Institute of Genomics (BIG) Data Center (accession number: CRA002390), originally published by Xiong Y et al., 2021	Re-analysis of RNA sequencing data published by Xiong Y et al., 2021		Major findings were (i) more than half of the interactions between lncRNAs‐PCGs of BALF samples established by trans‐acting lncRNA HOTAIRM1 (decreased in BALF), PVT1 (increased in BALF and novel transcript AL392172.1 (not observed in current version Ensembl or NCBI, increased), (ii) binding of several deregulated lncRNAs have been shown to bind with SARS-CoV-2 genome by computational tool; the 5′…	Moazzam-Jazi M et al., 2021							ARHGAP15-AS1	Decrease	Moazzam-Jazi M et al., 2021		ARHGAP15-AS1		CRNDE				CHRM3-AS2	Decrease (COVID-ICU vs COVID NON-ICU )	Shaath H et al., 2021		LINC00298		LINC00174			LINC01619/ENSG00000257242.8	Decrease (BALF)	Mukherjee S et al., 2021	Increased in 2 or more studies				EBLN3P	Decrease (severe vs nonsevere)	Cheng J et al., 2021
ARHGAP15-AS1	Decrease	PBMC	PBMC and BALF	Beijing Institute of Genomics (BIG) Data Center (accession number: CRA002390), originally published by Xiong Y et al., 2021	Re-analysis of RNA sequencing data published by Xiong Y et al., 2021		Major findings were (i) more than half of the interactions between lncRNAs‐PCGs of BALF samples established by trans‐acting lncRNA HOTAIRM1 (decreased in BALF), PVT1 (increased in BALF and novel transcript AL392172.1 (not observed in current version Ensembl or NCBI, increased), (ii) binding of several deregulated lncRNAs have been shown to bind with SARS-CoV-2 genome by computational tool; the 5′…	Moazzam-Jazi M et al., 2021							ARNILA	Decrease (severe vs nonsevere)	Cheng J et al., 2021		ARNILA		CYP1B1-AS1				HAR1A	Decrease	Moazzam-Jazi M et al., 2021		LINC00299		LINC00265			LINC02384	Increase (COVID-non ICU vs Non-COVID-non ICU)	Shaath H et al., 2021	Decreased in 2 or more studies				FGD5-AS1	Decrease	Moazzam-Jazi M et al., 2021
ATP2B1-AS1	Decrease	PBMC	PBMC and BALF	Beijing Institute of Genomics (BIG) Data Center (accession number: CRA002390), originally published by Xiong Y et al., 2021	Re-analysis of RNA sequencing data published by Xiong Y et al., 2021		Major findings were (i) more than half of the interactions between lncRNAs‐PCGs of BALF samples established by trans‐acting lncRNA HOTAIRM1 (decreased in BALF), PVT1 (increased in BALF and novel transcript AL392172.1 (not observed in current version Ensembl or NCBI, increased), (ii) binding of several deregulated lncRNAs have been shown to bind with SARS-CoV-2 genome by computational tool; the 5′…	Moazzam-Jazi M et al., 2021							ARRDC1-AS1	Decrease	Moazzam-Jazi M et al., 2021		ARRDC1-AS1		CYTOR				HAR1A	Decrease (severe vs nonsevere)	Cheng J et al., 2021		LINC00402		LINC01127			MALAT1	Decrease	Moazzam-Jazi M et al., 2021	Increased in 4 studies				FGD5-AS1	Increase (COVID-non ICU vs Non-COVID-non ICU)	Shaath H et al., 2021
C2CD4D-AS1	Decrease	PBMC	PBMC and BALF	Beijing Institute of Genomics (BIG) Data Center (accession number: CRA002390), originally published by Xiong Y et al., 2021	Re-analysis of RNA sequencing data published by Xiong Y et al., 2021		Major findings were (i) more than half of the interactions between lncRNAs‐PCGs of BALF samples established by trans‐acting lncRNA HOTAIRM1 (decreased in BALF), PVT1 (increased in BALF and novel transcript AL392172.1 (not observed in current version Ensembl or NCBI, increased), (ii) binding of several deregulated lncRNAs have been shown to bind with SARS-CoV-2 genome by computational tool; the 5′…	Moazzam-Jazi M et al., 2021							ASB16-AS1	Decrease	Moazzam-Jazi M et al., 2021		ASB16-AS1		DDIT4-AS1				KDM2B-DT	Decrease	Moazzam-Jazi M et al., 2021		LINC00861		LINC01184			MALAT1	Decrease (severe vs nonsevere)	Cheng J et al., 2021	Increased in 4 studies				GAS5	Increase	Moazzam-Jazi M et al., 2021
CDC42-IT1	Decrease	PBMC	PBMC and BALF	Beijing Institute of Genomics (BIG) Data Center (accession number: CRA002390), originally published by Xiong Y et al., 2021	Re-analysis of RNA sequencing data published by Xiong Y et al., 2021		Major findings were (i) more than half of the interactions between lncRNAs‐PCGs of BALF samples established by trans‐acting lncRNA HOTAIRM1 (decreased in BALF), PVT1 (increased in BALF and novel transcript AL392172.1 (not observed in current version Ensembl or NCBI, increased), (ii) binding of several deregulated lncRNAs have been shown to bind with SARS-CoV-2 genome by computational tool; the 5′…	Moazzam-Jazi M et al., 2021							BISPR	Decrease (severe vs nonsevere)	Cheng J et al., 2021		BISPR		DLEU2				KDM2B-DT	Decrease (severe vs nonsevere)	Cheng J et al., 2021		LINC00944		LINC01619/ENSG00000257242.8			MALAT1/ENSG00000251562.8	Decrease (BALF)	Mukherjee S et al., 2021	Increased in 4 studies				GAS5	Decrease (severe vs nonsevere)	Cheng J et al., 2021
GABPB1-IT1	Decrease	PBMC	PBMC and BALF	Beijing Institute of Genomics (BIG) Data Center (accession number: CRA002390), originally published by Xiong Y et al., 2021	Re-analysis of RNA sequencing data published by Xiong Y et al., 2021		Major findings were (i) more than half of the interactions between lncRNAs‐PCGs of BALF samples established by trans‐acting lncRNA HOTAIRM1 (decreased in BALF), PVT1 (increased in BALF and novel transcript AL392172.1 (not observed in current version Ensembl or NCBI, increased), (ii) binding of several deregulated lncRNAs have been shown to bind with SARS-CoV-2 genome by computational tool; the 5′…	Moazzam-Jazi M et al., 2021							BTG3-AS1	Decrease (severe vs nonsevere)	Cheng J et al., 2021		BTG3-AS1		DLGAP1-AS1				LINC00106	Decrease (severe vs nonsevere)	Cheng J et al., 2021		LINC00987		LINC02207			MIAT	Increased	Laha S et al., 2021	Decreased in 2 or more studies				GMDS-DT	Increase	Moazzam-Jazi M et al., 2021
HAR1A	Decrease	PBMC	PBMC and BALF	Beijing Institute of Genomics (BIG) Data Center (accession number: CRA002390), originally published by Xiong Y et al., 2021	Re-analysis of RNA sequencing data published by Xiong Y et al., 2021		Major findings were (i) more than half of the interactions between lncRNAs‐PCGs of BALF samples established by trans‐acting lncRNA HOTAIRM1 (decreased in BALF), PVT1 (increased in BALF and novel transcript AL392172.1 (not observed in current version Ensembl or NCBI, increased), (ii) binding of several deregulated lncRNAs have been shown to bind with SARS-CoV-2 genome by computational tool; the 5′…	Moazzam-Jazi M et al., 2021							C10orf25	Decrease	Moazzam-Jazi M et al., 2021		C10orf25		DTNB-AS1				LINC00106	Decrease (severe vs nonsevere)	Cheng J et al., 2021		LINC01089		LINC02289			PDC-AS1/ENSG00000229739.4	Decrease (BALF)	Mukherjee S et al., 2021	Increased in 2 or more studies				GMDS-DT	Decrease (severe vs nonsevere)	Cheng J et al., 2021
HIPK1-AS1	Decrease	PBMC	PBMC and BALF	Beijing Institute of Genomics (BIG) Data Center (accession number: CRA002390), originally published by Xiong Y et al., 2021	Re-analysis of RNA sequencing data published by Xiong Y et al., 2021		Major findings were (i) more than half of the interactions between lncRNAs‐PCGs of BALF samples established by trans‐acting lncRNA HOTAIRM1 (decreased in BALF), PVT1 (increased in BALF and novel transcript AL392172.1 (not observed in current version Ensembl or NCBI, increased), (ii) binding of several deregulated lncRNAs have been shown to bind with SARS-CoV-2 genome by computational tool; the 5′…	Moazzam-Jazi M et al., 2021							C15orf54	Decrease (severe vs nonsevere)	Cheng J et al., 2021		C15orf54		EIF3J-DT				LINC00298	Decrease	Moazzam-Jazi M et al., 2021		LINC01138		MALAT1			RNF213-AS1/ENSG00000263069.6	Decrease (BALF)	Mukherjee S et al., 2021	Increased in 2 or more studies				KCNQ1OT1	Increase	Moazzam-Jazi M et al., 2021
KDM2B-DT	Decrease	PBMC	PBMC and BALF	Beijing Institute of Genomics (BIG) Data Center (accession number: CRA002390), originally published by Xiong Y et al., 2021	Re-analysis of RNA sequencing data published by Xiong Y et al., 2021		Major findings were (i) more than half of the interactions between lncRNAs‐PCGs of BALF samples established by trans‐acting lncRNA HOTAIRM1 (decreased in BALF), PVT1 (increased in BALF and novel transcript AL392172.1 (not observed in current version Ensembl or NCBI, increased), (ii) binding of several deregulated lncRNAs have been shown to bind with SARS-CoV-2 genome by computational tool; the 5′…	Moazzam-Jazi M et al., 2021							C1RL-AS1	Decrease	Moazzam-Jazi M et al., 2021		C1RL-AS1		FAM198B-AS1				LINC00298	Decrease (severe vs nonsevere)	Cheng J et al., 2021		LINC01184		MEG3			SNHG16	Increase	Moazzam-Jazi M et al., 2021	Decreased in 2 or more studies				KCNQ1OT1	Decreased	Turjya RR et al., 2020
KLF3-AS1	Decrease	PBMC	PBMC and BALF	Beijing Institute of Genomics (BIG) Data Center (accession number: CRA002390), originally published by Xiong Y et al., 2021	Re-analysis of RNA sequencing data published by Xiong Y et al., 2021		Major findings were (i) more than half of the interactions between lncRNAs‐PCGs of BALF samples established by trans‐acting lncRNA HOTAIRM1 (decreased in BALF), PVT1 (increased in BALF and novel transcript AL392172.1 (not observed in current version Ensembl or NCBI, increased), (ii) binding of several deregulated lncRNAs have been shown to bind with SARS-CoV-2 genome by computational tool; the 5′…	Moazzam-Jazi M et al., 2021							C2CD4D-AS1	Decrease	Moazzam-Jazi M et al., 2021		C2CD4D-AS1		GK-AS1				LINC00299	Decrease	Moazzam-Jazi M et al., 2021		LINC01422		NEAT1			SNHG6	Increase	Moazzam-Jazi M et al., 2021	Decreased in 2 or more studies				LINC00115	Decrease (severe vs nonsevere)	Cheng J et al., 2021
KRT73-AS1	Decrease	PBMC	PBMC and BALF	Beijing Institute of Genomics (BIG) Data Center (accession number: CRA002390), originally published by Xiong Y et al., 2021	Re-analysis of RNA sequencing data published by Xiong Y et al., 2021		Major findings were (i) more than half of the interactions between lncRNAs‐PCGs of BALF samples established by trans‐acting lncRNA HOTAIRM1 (decreased in BALF), PVT1 (increased in BALF and novel transcript AL392172.1 (not observed in current version Ensembl or NCBI, increased), (ii) binding of several deregulated lncRNAs have been shown to bind with SARS-CoV-2 genome by computational tool; the 5′…	Moazzam-Jazi M et al., 2021							C3orf35	Decrease (severe vs nonsevere)	Cheng J et al., 2021		C3orf35		H19				LINC00299	Decrease (severe vs nonsevere)	Cheng J et al., 2021		LINC01871		PDC-AS1/ENSG00000229739.4			SNHG8	Increase	Moazzam-Jazi M et al., 2021	Decreased in 2 or more studies				LINC00115	Increased	Laha S et al., 2021
KRTAP5-AS1	Decrease	PBMC	PBMC and BALF	Beijing Institute of Genomics (BIG) Data Center (accession number: CRA002390), originally published by Xiong Y et al., 2021	Re-analysis of RNA sequencing data published by Xiong Y et al., 2021		Major findings were (i) more than half of the interactions between lncRNAs‐PCGs of BALF samples established by trans‐acting lncRNA HOTAIRM1 (decreased in BALF), PVT1 (increased in BALF and novel transcript AL392172.1 (not observed in current version Ensembl or NCBI, increased), (ii) binding of several deregulated lncRNAs have been shown to bind with SARS-CoV-2 genome by computational tool; the 5′…	Moazzam-Jazi M et al., 2021							C6orf47-AS1	Decrease (COVID-non ICU vs Non-COVID-non ICU)	Shaath H et al., 2021		C6orf47-AS1		HCG11				LINC00402	Decrease	Moazzam-Jazi M et al., 2021		LINC01934		RNF213-AS1			TP53TG1	Increase	Moazzam-Jazi M et al., 2021	Increased in 2 or more studies				LINC00342	Increase	Moazzam-Jazi M et al., 2021
LINC002481	Decrease	PBMC	PBMC and BALF	Beijing Institute of Genomics (BIG) Data Center (accession number: CRA002390), originally published by Xiong Y et al., 2021	Re-analysis of RNA sequencing data published by Xiong Y et al., 2021		Major findings were (i) more than half of the interactions between lncRNAs‐PCGs of BALF samples established by trans‐acting lncRNA HOTAIRM1 (decreased in BALF), PVT1 (increased in BALF and novel transcript AL392172.1 (not observed in current version Ensembl or NCBI, increased), (ii) binding of several deregulated lncRNAs have been shown to bind with SARS-CoV-2 genome by computational tool; the 5′…	Moazzam-Jazi M et al., 2021							C8orf31	Decrease (severe vs nonsevere)	Cheng J et al., 2021		C8orf31		HCG27				LINC00402	Decrease (severe vs nonsevere)	Cheng J et al., 2021		LINC02033		WAKMAR2			WAKMAR2/ENSG00000237499.7	Decrease (BALF)	Mukherjee S et al., 2021	Increased in 2 or more studies				LINC00342	Decrease (severe vs nonsevere)	Cheng J et al., 2021
LINC00298	Decrease	PBMC	PBMC and BALF	Beijing Institute of Genomics (BIG) Data Center (accession number: CRA002390), originally published by Xiong Y et al., 2021	Re-analysis of RNA sequencing data published by Xiong Y et al., 2021		Major findings were (i) more than half of the interactions between lncRNAs‐PCGs of BALF samples established by trans‐acting lncRNA HOTAIRM1 (decreased in BALF), PVT1 (increased in BALF and novel transcript AL392172.1 (not observed in current version Ensembl or NCBI, increased), (ii) binding of several deregulated lncRNAs have been shown to bind with SARS-CoV-2 genome by computational tool; the 5′…	Moazzam-Jazi M et al., 2021							C9orf139	Decrease	Moazzam-Jazi M et al., 2021		C9orf139		HCG9				LINC00861	Decrease	Moazzam-Jazi M et al., 2021		LINC02084		WDFY3-AS2										LINC00504	Increase	Moazzam-Jazi M et al., 2021
LINC00299	Decrease	PBMC	PBMC and BALF	Beijing Institute of Genomics (BIG) Data Center (accession number: CRA002390), originally published by Xiong Y et al., 2021	Re-analysis of RNA sequencing data published by Xiong Y et al., 2021		Major findings were (i) more than half of the interactions between lncRNAs‐PCGs of BALF samples established by trans‐acting lncRNA HOTAIRM1 (decreased in BALF), PVT1 (increased in BALF and novel transcript AL392172.1 (not observed in current version Ensembl or NCBI, increased), (ii) binding of several deregulated lncRNAs have been shown to bind with SARS-CoV-2 genome by computational tool; the 5′…	Moazzam-Jazi M et al., 2021							CCAT2	Decrease (severe vs nonsevere)	Cheng J et al., 2021		CCAT2		HCP5				LINC00861	Decrease (COVID-ICU vs COVID NON-ICU )	Shaath H et al., 2021		LINC02384												LINC00504	Decreased	Turjya RR et al., 2020
LINC00402	Decrease	PBMC	PBMC and BALF	Beijing Institute of Genomics (BIG) Data Center (accession number: CRA002390), originally published by Xiong Y et al., 2021	Re-analysis of RNA sequencing data published by Xiong Y et al., 2021		Major findings were (i) more than half of the interactions between lncRNAs‐PCGs of BALF samples established by trans‐acting lncRNA HOTAIRM1 (decreased in BALF), PVT1 (increased in BALF and novel transcript AL392172.1 (not observed in current version Ensembl or NCBI, increased), (ii) binding of several deregulated lncRNAs have been shown to bind with SARS-CoV-2 genome by computational tool; the 5′…	Moazzam-Jazi M et al., 2021							CCDC18-AS1	Decrease (severe vs nonsevere)	Cheng J et al., 2021		CCDC18-AS1		HEIH				LINC00861	Decrease (severe vs nonsevere)	Cheng J et al., 2021		LINC02446												LINC00630	Increase	Moazzam-Jazi M et al., 2021
LINC00513	Decrease	PBMC	PBMC and BALF	Beijing Institute of Genomics (BIG) Data Center (accession number: CRA002390), originally published by Xiong Y et al., 2021	Re-analysis of RNA sequencing data published by Xiong Y et al., 2021		Major findings were (i) more than half of the interactions between lncRNAs‐PCGs of BALF samples established by trans‐acting lncRNA HOTAIRM1 (decreased in BALF), PVT1 (increased in BALF and novel transcript AL392172.1 (not observed in current version Ensembl or NCBI, increased), (ii) binding of several deregulated lncRNAs have been shown to bind with SARS-CoV-2 genome by computational tool; the 5′…	Moazzam-Jazi M et al., 2021							CD27-AS1	Decrease	Moazzam-Jazi M et al., 2021		CD27-AS1		HIF1A-AS2				LINC00944	Decrease	Moazzam-Jazi M et al., 2021		LINC02520												LINC00630	Decrease (severe vs nonsevere)	Cheng J et al., 2021
LINC00612	Decrease	PBMC	PBMC and BALF	Beijing Institute of Genomics (BIG) Data Center (accession number: CRA002390), originally published by Xiong Y et al., 2021	Re-analysis of RNA sequencing data published by Xiong Y et al., 2021		Major findings were (i) more than half of the interactions between lncRNAs‐PCGs of BALF samples established by trans‐acting lncRNA HOTAIRM1 (decreased in BALF), PVT1 (increased in BALF and novel transcript AL392172.1 (not observed in current version Ensembl or NCBI, increased), (ii) binding of several deregulated lncRNAs have been shown to bind with SARS-CoV-2 genome by computational tool; the 5′…	Moazzam-Jazi M et al., 2021							CD2BP2-DT	Decrease	Moazzam-Jazi M et al., 2021		CD2BP2-DT		IL10RB-DT				LINC00944	Decrease (severe vs nonsevere)	Cheng J et al., 2021		LINC02604												LINC00662	Decrease (severe vs nonsevere)	Cheng J et al., 2021
LINC00623	Decrease	PBMC	PBMC and BALF	Beijing Institute of Genomics (BIG) Data Center (accession number: CRA002390), originally published by Xiong Y et al., 2021	Re-analysis of RNA sequencing data published by Xiong Y et al., 2021		Major findings were (i) more than half of the interactions between lncRNAs‐PCGs of BALF samples established by trans‐acting lncRNA HOTAIRM1 (decreased in BALF), PVT1 (increased in BALF and novel transcript AL392172.1 (not observed in current version Ensembl or NCBI, increased), (ii) binding of several deregulated lncRNAs have been shown to bind with SARS-CoV-2 genome by computational tool; the 5′…	Moazzam-Jazi M et al., 2021							CDC37L1-DT	Decrease (severe vs nonsevere)	Cheng J et al., 2021		CDC37L1-DT		INHBA-AS1				LINC00987	Decrease	Moazzam-Jazi M et al., 2021		LINC02700												LINC00662	Increased	Laha S et al., 2021
LINC00892	Decrease	PBMC	PBMC and BALF	Beijing Institute of Genomics (BIG) Data Center (accession number: CRA002390), originally published by Xiong Y et al., 2021	Re-analysis of RNA sequencing data published by Xiong Y et al., 2021		Major findings were (i) more than half of the interactions between lncRNAs‐PCGs of BALF samples established by trans‐acting lncRNA HOTAIRM1 (decreased in BALF), PVT1 (increased in BALF and novel transcript AL392172.1 (not observed in current version Ensembl or NCBI, increased), (ii) binding of several deregulated lncRNAs have been shown to bind with SARS-CoV-2 genome by computational tool; the 5′…	Moazzam-Jazi M et al., 2021							CDC42-IT1	Decrease	Moazzam-Jazi M et al., 2021		CDC42-IT1		KLHL6-AS1				LINC00987	Decrease (severe vs nonsevere)	Cheng J et al., 2021		LINC02728												LINC01003	Increase	Moazzam-Jazi M et al., 2021
LINC00943	Decrease	PBMC	PBMC and BALF	Beijing Institute of Genomics (BIG) Data Center (accession number: CRA002390), originally published by Xiong Y et al., 2021	Re-analysis of RNA sequencing data published by Xiong Y et al., 2021		Major findings were (i) more than half of the interactions between lncRNAs‐PCGs of BALF samples established by trans‐acting lncRNA HOTAIRM1 (decreased in BALF), PVT1 (increased in BALF and novel transcript AL392172.1 (not observed in current version Ensembl or NCBI, increased), (ii) binding of several deregulated lncRNAs have been shown to bind with SARS-CoV-2 genome by computational tool; the 5′…	Moazzam-Jazi M et al., 2021							CERNA1	Decrease (severe vs nonsevere)	Cheng J et al., 2021		CERNA1		LASI(antisensestrandtoICAM-1,notcataloguedinNCBIandEnsembldatabase)				LINC01089	Decrease	Moazzam-Jazi M et al., 2021		MIAT												LINC01003	Decrease (severe vs nonsevere)	Cheng J et al., 2021
LINC00944	Decrease	PBMC	PBMC and BALF	Beijing Institute of Genomics (BIG) Data Center (accession number: CRA002390), originally published by Xiong Y et al., 2021	Re-analysis of RNA sequencing data published by Xiong Y et al., 2021		Major findings were (i) more than half of the interactions between lncRNAs‐PCGs of BALF samples established by trans‐acting lncRNA HOTAIRM1 (decreased in BALF), PVT1 (increased in BALF and novel transcript AL392172.1 (not observed in current version Ensembl or NCBI, increased), (ii) binding of several deregulated lncRNAs have been shown to bind with SARS-CoV-2 genome by computational tool; the 5′…	Moazzam-Jazi M et al., 2021							CEROX1	Decrease (severe vs nonsevere)	Cheng J et al., 2021		CEROX1		LINC00278				LINC01089	Decrease (severe vs nonsevere)	Cheng J et al., 2021		MIR17HG												LINC01146	Increase	Moazzam-Jazi M et al., 2021
LINC00987	Decrease	PBMC	PBMC and BALF	Beijing Institute of Genomics (BIG) Data Center (accession number: CRA002390), originally published by Xiong Y et al., 2021	Re-analysis of RNA sequencing data published by Xiong Y et al., 2021		Major findings were (i) more than half of the interactions between lncRNAs‐PCGs of BALF samples established by trans‐acting lncRNA HOTAIRM1 (decreased in BALF), PVT1 (increased in BALF and novel transcript AL392172.1 (not observed in current version Ensembl or NCBI, increased), (ii) binding of several deregulated lncRNAs have been shown to bind with SARS-CoV-2 genome by computational tool; the 5′…	Moazzam-Jazi M et al., 2021							CNNM3-DT	Decrease (severe vs nonsevere)	Cheng J et al., 2021		CNNM3-DT		LINC00312				LINC01138	Decrease	Moazzam-Jazi M et al., 2021		MIRLET7A1HG												LINC01146	Decrease (severe vs nonsevere)	Cheng J et al., 2021
LINC01138	Decrease	PBMC	PBMC and BALF	Beijing Institute of Genomics (BIG) Data Center (accession number: CRA002390), originally published by Xiong Y et al., 2021	Re-analysis of RNA sequencing data published by Xiong Y et al., 2021		Major findings were (i) more than half of the interactions between lncRNAs‐PCGs of BALF samples established by trans‐acting lncRNA HOTAIRM1 (decreased in BALF), PVT1 (increased in BALF and novel transcript AL392172.1 (not observed in current version Ensembl or NCBI, increased), (ii) binding of several deregulated lncRNAs have been shown to bind with SARS-CoV-2 genome by computational tool; the 5′…	Moazzam-Jazi M et al., 2021							COPDA1	Decrease (severe vs nonsevere)	Cheng J et al., 2021		COPDA1		LINC00473				LINC01138	Decrease (severe vs nonsevere)	Cheng J et al., 2021		PRKCQ-AS1												LINC02432	Increase	Moazzam-Jazi M et al., 2021
LINC01303	Decrease	PBMC	PBMC and BALF	Beijing Institute of Genomics (BIG) Data Center (accession number: CRA002390), originally published by Xiong Y et al., 2021	Re-analysis of RNA sequencing data published by Xiong Y et al., 2021		Major findings were (i) more than half of the interactions between lncRNAs‐PCGs of BALF samples established by trans‐acting lncRNA HOTAIRM1 (decreased in BALF), PVT1 (increased in BALF and novel transcript AL392172.1 (not observed in current version Ensembl or NCBI, increased), (ii) binding of several deregulated lncRNAs have been shown to bind with SARS-CoV-2 genome by computational tool; the 5′…	Moazzam-Jazi M et al., 2021							CR381653.1	Decrease (severe vs nonsevere)	Cheng J et al., 2021		CR381653.1		LINC00482				LINC01184	Decrease (severe vs nonsevere)	Cheng J et al., 2021		SMIM25												LINC02432	Decrease (severe vs nonsevere)	Cheng J et al., 2021
LINC01422	Decrease	PBMC	PBMC and BALF	Beijing Institute of Genomics (BIG) Data Center (accession number: CRA002390), originally published by Xiong Y et al., 2021	Re-analysis of RNA sequencing data published by Xiong Y et al., 2021		Major findings were (i) more than half of the interactions between lncRNAs‐PCGs of BALF samples established by trans‐acting lncRNA HOTAIRM1 (decreased in BALF), PVT1 (increased in BALF and novel transcript AL392172.1 (not observed in current version Ensembl or NCBI, increased), (ii) binding of several deregulated lncRNAs have been shown to bind with SARS-CoV-2 genome by computational tool; the 5′…	Moazzam-Jazi M et al., 2021							DISC1FP1	Decrease (severe vs nonsevere)	Cheng J et al., 2021		DISC1FP1		LINC00605				LINC01422	Decrease	Moazzam-Jazi M et al., 2021		SND1-IT1												LINC02723	Increase	Moazzam-Jazi M et al., 2021
LINC01934	Decrease	PBMC	PBMC and BALF	Beijing Institute of Genomics (BIG) Data Center (accession number: CRA002390), originally published by Xiong Y et al., 2021	Re-analysis of RNA sequencing data published by Xiong Y et al., 2021		Major findings were (i) more than half of the interactions between lncRNAs‐PCGs of BALF samples established by trans‐acting lncRNA HOTAIRM1 (decreased in BALF), PVT1 (increased in BALF and novel transcript AL392172.1 (not observed in current version Ensembl or NCBI, increased), (ii) binding of several deregulated lncRNAs have been shown to bind with SARS-CoV-2 genome by computational tool; the 5′…	Moazzam-Jazi M et al., 2021							EML4-AS1	Decrease	Moazzam-Jazi M et al., 2021		EML4-AS1		LINC00632				LINC01422	Decrease (severe vs nonsevere)	Cheng J et al., 2021		SNHG16												LINC02723	Decrease (severe vs nonsevere)	Cheng J et al., 2021
LINC01962	Decrease	PBMC	PBMC and BALF	Beijing Institute of Genomics (BIG) Data Center (accession number: CRA002390), originally published by Xiong Y et al., 2021	Re-analysis of RNA sequencing data published by Xiong Y et al., 2021		Major findings were (i) more than half of the interactions between lncRNAs‐PCGs of BALF samples established by trans‐acting lncRNA HOTAIRM1 (decreased in BALF), PVT1 (increased in BALF and novel transcript AL392172.1 (not observed in current version Ensembl or NCBI, increased), (ii) binding of several deregulated lncRNAs have been shown to bind with SARS-CoV-2 genome by computational tool; the 5′…	Moazzam-Jazi M et al., 2021							ERVK13-1	Decrease (severe vs nonsevere)	Cheng J et al., 2021		ERVK13-1		LINC00671				LINC01871	Decrease (COVID-ICU vs COVID NON-ICU )	Shaath H et al., 2021		SNHG6												LINC-PINT	Decrease (severe vs nonsevere)	Cheng J et al., 2021
LINC02033	Decrease	PBMC	PBMC and BALF	Beijing Institute of Genomics (BIG) Data Center (accession number: CRA002390), originally published by Xiong Y et al., 2021	Re-analysis of RNA sequencing data published by Xiong Y et al., 2021		Major findings were (i) more than half of the interactions between lncRNAs‐PCGs of BALF samples established by trans‐acting lncRNA HOTAIRM1 (decreased in BALF), PVT1 (increased in BALF and novel transcript AL392172.1 (not observed in current version Ensembl or NCBI, increased), (ii) binding of several deregulated lncRNAs have been shown to bind with SARS-CoV-2 genome by computational tool; the 5′…	Moazzam-Jazi M et al., 2021							FAM106A	Decrease	Moazzam-Jazi M et al., 2021		FAM106A		LINC00842				LINC01871	Decrease (severe vs nonsevere)	Cheng J et al., 2021		SNHG8												LINC-PINT	Decrease	Moazzam-Jazi M et al., 2021
LINC02084	Decrease	PBMC	PBMC and BALF	Beijing Institute of Genomics (BIG) Data Center (accession number: CRA002390), originally published by Xiong Y et al., 2021	Re-analysis of RNA sequencing data published by Xiong Y et al., 2021		Major findings were (i) more than half of the interactions between lncRNAs‐PCGs of BALF samples established by trans‐acting lncRNA HOTAIRM1 (decreased in BALF), PVT1 (increased in BALF and novel transcript AL392172.1 (not observed in current version Ensembl or NCBI, increased), (ii) binding of several deregulated lncRNAs have been shown to bind with SARS-CoV-2 genome by computational tool; the 5′…	Moazzam-Jazi M et al., 2021							FAM111A-DT	Decrease (severe vs nonsevere)	Cheng J et al., 2021		FAM111A-DT		LINC01133				LINC01934	Decrease	Moazzam-Jazi M et al., 2021		TP53TG1												LINC-PINT	Increase	Moazzam-Jazi M et al., 2021
LINC02384	Decrease	PBMC	PBMC and BALF	Beijing Institute of Genomics (BIG) Data Center (accession number: CRA002390), originally published by Xiong Y et al., 2021	Re-analysis of RNA sequencing data published by Xiong Y et al., 2021		Major findings were (i) more than half of the interactions between lncRNAs‐PCGs of BALF samples established by trans‐acting lncRNA HOTAIRM1 (decreased in BALF), PVT1 (increased in BALF and novel transcript AL392172.1 (not observed in current version Ensembl or NCBI, increased), (ii) binding of several deregulated lncRNAs have been shown to bind with SARS-CoV-2 genome by computational tool; the 5′…	Moazzam-Jazi M et al., 2021							FAM160A1-DT	Decrease (severe vs nonsevere)	Cheng J et al., 2021		FAM160A1-DT		LINC01176				LINC01934	Decrease (severe vs nonsevere)	Cheng J et al., 2021		TRBV11-2												LINC-PINT/ENSG00000231721.7	Decrease (BALF)	Mukherjee S et al., 2021
LINC02520	Decrease	PBMC	PBMC and BALF	Beijing Institute of Genomics (BIG) Data Center (accession number: CRA002390), originally published by Xiong Y et al., 2021	Re-analysis of RNA sequencing data published by Xiong Y et al., 2021		Major findings were (i) more than half of the interactions between lncRNAs‐PCGs of BALF samples established by trans‐acting lncRNA HOTAIRM1 (decreased in BALF), PVT1 (increased in BALF and novel transcript AL392172.1 (not observed in current version Ensembl or NCBI, increased), (ii) binding of several deregulated lncRNAs have been shown to bind with SARS-CoV-2 genome by computational tool; the 5′…	Moazzam-Jazi M et al., 2021							FAM215B	Decrease (severe vs nonsevere)	Cheng J et al., 2021		FAM215B		LINC01232				LINC02033	Decrease	Moazzam-Jazi M et al., 2021		ZNF528-AS1												LINC-PINT/ENSG00000231721.7	Increase (A549 cells)	Mukherjee S et al., 2021
LINC02728	Decrease	PBMC	PBMC and BALF	Beijing Institute of Genomics (BIG) Data Center (accession number: CRA002390), originally published by Xiong Y et al., 2021	Re-analysis of RNA sequencing data published by Xiong Y et al., 2021		Major findings were (i) more than half of the interactions between lncRNAs‐PCGs of BALF samples established by trans‐acting lncRNA HOTAIRM1 (decreased in BALF), PVT1 (increased in BALF and novel transcript AL392172.1 (not observed in current version Ensembl or NCBI, increased), (ii) binding of several deregulated lncRNAs have been shown to bind with SARS-CoV-2 genome by computational tool; the 5′…	Moazzam-Jazi M et al., 2021							FAM225A	Decrease (severe vs nonsevere)	Cheng J et al., 2021		FAM225A		LINC01278				LINC02033	Decrease (severe vs nonsevere)	Cheng J et al., 2021														LINC-PINT/ENSG00000231721.7	Increase (Calu cells)	Mukherjee S et al., 2021
LINC-PINT	Decrease	PBMC	PBMC and BALF	Beijing Institute of Genomics (BIG) Data Center (accession number: CRA002390), originally published by Xiong Y et al., 2021	Re-analysis of RNA sequencing data published by Xiong Y et al., 2021		Major findings were (i) more than half of the interactions between lncRNAs‐PCGs of BALF samples established by trans‐acting lncRNA HOTAIRM1 (decreased in BALF), PVT1 (increased in BALF and novel transcript AL392172.1 (not observed in current version Ensembl or NCBI, increased), (ii) binding of several deregulated lncRNAs have been shown to bind with SARS-CoV-2 genome by computational tool; the 5′…	Moazzam-Jazi M et al., 2021							FAM225B	Decrease (severe vs nonsevere)	Cheng J et al., 2021		FAM225B		LINC01410				LINC02084	Decrease	Moazzam-Jazi M et al., 2021														MIR181A1HG	Increase	Moazzam-Jazi M et al., 2021
MALAT1	Decrease	PBMC	PBMC and BALF	Beijing Institute of Genomics (BIG) Data Center (accession number: CRA002390), originally published by Xiong Y et al., 2021	Re-analysis of RNA sequencing data published by Xiong Y et al., 2021		Major findings were (i) more than half of the interactions between lncRNAs‐PCGs of BALF samples established by trans‐acting lncRNA HOTAIRM1 (decreased in BALF), PVT1 (increased in BALF and novel transcript AL392172.1 (not observed in current version Ensembl or NCBI, increased), (ii) binding of several deregulated lncRNAs have been shown to bind with SARS-CoV-2 genome by computational tool; the 5′…	Moazzam-Jazi M et al., 2021							FAM66A	Decrease (severe vs nonsevere)	Cheng J et al., 2021		FAM66A		LINC01504				LINC02084	Decrease (COVID-ICU vs COVID NON-ICU )	Shaath H et al., 2021														MIR181A1HG	Decrease (severe vs nonsevere)	Cheng J et al., 2021
MIR17HG	Decrease	PBMC	PBMC and BALF	Beijing Institute of Genomics (BIG) Data Center (accession number: CRA002390), originally published by Xiong Y et al., 2021	Re-analysis of RNA sequencing data published by Xiong Y et al., 2021		Major findings were (i) more than half of the interactions between lncRNAs‐PCGs of BALF samples established by trans‐acting lncRNA HOTAIRM1 (decreased in BALF), PVT1 (increased in BALF and novel transcript AL392172.1 (not observed in current version Ensembl or NCBI, increased), (ii) binding of several deregulated lncRNAs have been shown to bind with SARS-CoV-2 genome by computational tool; the 5′…	Moazzam-Jazi M et al., 2021							FAM66B	Decrease (severe vs nonsevere)	Cheng J et al., 2021		FAM66B		LINC01547				LINC02084	Decrease (severe vs nonsevere)	Cheng J et al., 2021														MIR3142HG	Decrease (severe vs nonsevere)	Cheng J et al., 2021
MIR181A2HG	Decrease	PBMC	PBMC and BALF	Beijing Institute of Genomics (BIG) Data Center (accession number: CRA002390), originally published by Xiong Y et al., 2021	Re-analysis of RNA sequencing data published by Xiong Y et al., 2021		Major findings were (i) more than half of the interactions between lncRNAs‐PCGs of BALF samples established by trans‐acting lncRNA HOTAIRM1 (decreased in BALF), PVT1 (increased in BALF and novel transcript AL392172.1 (not observed in current version Ensembl or NCBI, increased), (ii) binding of several deregulated lncRNAs have been shown to bind with SARS-CoV-2 genome by computational tool; the 5′…	Moazzam-Jazi M et al., 2021							FOXD2-AS1	Decrease (severe vs nonsevere)	Cheng J et al., 2021		FOXD2-AS1		LINC01988				LINC02384	Decrease	Moazzam-Jazi M et al., 2021														MIR3142HG	Increased	Turjya RR et al., 2020
MIR4453HG	Decrease	PBMC	PBMC and BALF	Beijing Institute of Genomics (BIG) Data Center (accession number: CRA002390), originally published by Xiong Y et al., 2021	Re-analysis of RNA sequencing data published by Xiong Y et al., 2021		Major findings were (i) more than half of the interactions between lncRNAs‐PCGs of BALF samples established by trans‐acting lncRNA HOTAIRM1 (decreased in BALF), PVT1 (increased in BALF and novel transcript AL392172.1 (not observed in current version Ensembl or NCBI, increased), (ii) binding of several deregulated lncRNAs have been shown to bind with SARS-CoV-2 genome by computational tool; the 5′…	Moazzam-Jazi M et al., 2021							FRG1-DT	Decrease (severe vs nonsevere)	Cheng J et al., 2021		FRG1-DT		LINC02015				LINC02384	Decrease (severe vs nonsevere)	Cheng J et al., 2021														NORAD	Increase	Moazzam-Jazi M et al., 2021
MYADM-AS1	Decrease	PBMC	PBMC and BALF	Beijing Institute of Genomics (BIG) Data Center (accession number: CRA002390), originally published by Xiong Y et al., 2021	Re-analysis of RNA sequencing data published by Xiong Y et al., 2021		Major findings were (i) more than half of the interactions between lncRNAs‐PCGs of BALF samples established by trans‐acting lncRNA HOTAIRM1 (decreased in BALF), PVT1 (increased in BALF and novel transcript AL392172.1 (not observed in current version Ensembl or NCBI, increased), (ii) binding of several deregulated lncRNAs have been shown to bind with SARS-CoV-2 genome by computational tool; the 5′…	Moazzam-Jazi M et al., 2021							GABPB1-IT1	Decrease	Moazzam-Jazi M et al., 2021		GABPB1-IT1		LINC02185				LINC02446	Decrease (COVID-ICU vs COVID NON-ICU )	Shaath H et al., 2021														NORAD	Decrease (severe vs nonsevere)	Cheng J et al., 2021
MZF1-AS1	Decrease	PBMC	PBMC and BALF	Beijing Institute of Genomics (BIG) Data Center (accession number: CRA002390), originally published by Xiong Y et al., 2021	Re-analysis of RNA sequencing data published by Xiong Y et al., 2021		Major findings were (i) more than half of the interactions between lncRNAs‐PCGs of BALF samples established by trans‐acting lncRNA HOTAIRM1 (decreased in BALF), PVT1 (increased in BALF and novel transcript AL392172.1 (not observed in current version Ensembl or NCBI, increased), (ii) binding of several deregulated lncRNAs have been shown to bind with SARS-CoV-2 genome by computational tool; the 5′…	Moazzam-Jazi M et al., 2021							GARS1-DT	Decrease (severe vs nonsevere)	Cheng J et al., 2021		GARS1-DT		LINC02284				LINC02446	Decrease (severe vs nonsevere)	Cheng J et al., 2021														OLMALINC	Increase	Moazzam-Jazi M et al., 2021
N4BP2L2-IT2	Decrease	PBMC	PBMC and BALF	Beijing Institute of Genomics (BIG) Data Center (accession number: CRA002390), originally published by Xiong Y et al., 2021	Re-analysis of RNA sequencing data published by Xiong Y et al., 2021		Major findings were (i) more than half of the interactions between lncRNAs‐PCGs of BALF samples established by trans‐acting lncRNA HOTAIRM1 (decreased in BALF), PVT1 (increased in BALF and novel transcript AL392172.1 (not observed in current version Ensembl or NCBI, increased), (ii) binding of several deregulated lncRNAs have been shown to bind with SARS-CoV-2 genome by computational tool; the 5′…	Moazzam-Jazi M et al., 2021							GAS6-AS1	Decreased	Turjya RR et al., 2020		GAS6-AS1		LINC02541				LINC02520	Decrease	Moazzam-Jazi M et al., 2021														OLMALINC	Decrease (severe vs nonsevere)	Cheng J et al., 2021
OSER1-DT	Decrease	PBMC	PBMC and BALF	Beijing Institute of Genomics (BIG) Data Center (accession number: CRA002390), originally published by Xiong Y et al., 2021	Re-analysis of RNA sequencing data published by Xiong Y et al., 2021		Major findings were (i) more than half of the interactions between lncRNAs‐PCGs of BALF samples established by trans‐acting lncRNA HOTAIRM1 (decreased in BALF), PVT1 (increased in BALF and novel transcript AL392172.1 (not observed in current version Ensembl or NCBI, increased), (ii) binding of several deregulated lncRNAs have been shown to bind with SARS-CoV-2 genome by computational tool; the 5′…	Moazzam-Jazi M et al., 2021							GSN-AS1	Decrease	Moazzam-Jazi M et al., 2021		GSN-AS1		LINC02705				LINC02520	Decrease (severe vs nonsevere)	Cheng J et al., 2021														PAX8-AS1	Increase	Moazzam-Jazi M et al., 2021
OVCH1-AS1	Decrease	PBMC	PBMC and BALF	Beijing Institute of Genomics (BIG) Data Center (accession number: CRA002390), originally published by Xiong Y et al., 2021	Re-analysis of RNA sequencing data published by Xiong Y et al., 2021		Major findings were (i) more than half of the interactions between lncRNAs‐PCGs of BALF samples established by trans‐acting lncRNA HOTAIRM1 (decreased in BALF), PVT1 (increased in BALF and novel transcript AL392172.1 (not observed in current version Ensembl or NCBI, increased), (ii) binding of several deregulated lncRNAs have been shown to bind with SARS-CoV-2 genome by computational tool; the 5′…	Moazzam-Jazi M et al., 2021							GTSCR1	Decrease (severe vs nonsevere)	Cheng J et al., 2021		GTSCR1		LINC02724				LINC02604	Decrease	Moazzam-Jazi M et al., 2021														PAX8-AS1	Decrease	Moazzam-Jazi M et al., 2021
PEG13	Decrease	PBMC	PBMC and BALF	Beijing Institute of Genomics (BIG) Data Center (accession number: CRA002390), originally published by Xiong Y et al., 2021	Re-analysis of RNA sequencing data published by Xiong Y et al., 2021		Major findings were (i) more than half of the interactions between lncRNAs‐PCGs of BALF samples established by trans‐acting lncRNA HOTAIRM1 (decreased in BALF), PVT1 (increased in BALF and novel transcript AL392172.1 (not observed in current version Ensembl or NCBI, increased), (ii) binding of several deregulated lncRNAs have been shown to bind with SARS-CoV-2 genome by computational tool; the 5′…	Moazzam-Jazi M et al., 2021							HAR1B	Decrease (severe vs nonsevere)	Cheng J et al., 2021		HAR1B		LINC02777				LINC02604	Decrease (severe vs nonsevere)	Cheng J et al., 2021														PVT1	Increase	Moazzam-Jazi M et al., 2021
PHACTR2-AS1	Decrease	PBMC	PBMC and BALF	Beijing Institute of Genomics (BIG) Data Center (accession number: CRA002390), originally published by Xiong Y et al., 2021	Re-analysis of RNA sequencing data published by Xiong Y et al., 2021		Major findings were (i) more than half of the interactions between lncRNAs‐PCGs of BALF samples established by trans‐acting lncRNA HOTAIRM1 (decreased in BALF), PVT1 (increased in BALF and novel transcript AL392172.1 (not observed in current version Ensembl or NCBI, increased), (ii) binding of several deregulated lncRNAs have been shown to bind with SARS-CoV-2 genome by computational tool; the 5′…	Moazzam-Jazi M et al., 2021							HIPK1-AS1	Decrease	Moazzam-Jazi M et al., 2021		HIPK1-AS1		LINC02785				LINC02700	Decrease	Moazzam-Jazi M et al., 2021														PVT1	Decrease (severe vs nonsevere)	Cheng J et al., 2021
RASA3-IT1	Decrease	PBMC	PBMC and BALF	Beijing Institute of Genomics (BIG) Data Center (accession number: CRA002390), originally published by Xiong Y et al., 2021	Re-analysis of RNA sequencing data published by Xiong Y et al., 2021		Major findings were (i) more than half of the interactions between lncRNAs‐PCGs of BALF samples established by trans‐acting lncRNA HOTAIRM1 (decreased in BALF), PVT1 (increased in BALF and novel transcript AL392172.1 (not observed in current version Ensembl or NCBI, increased), (ii) binding of several deregulated lncRNAs have been shown to bind with SARS-CoV-2 genome by computational tool; the 5′…	Moazzam-Jazi M et al., 2021							HOTAIRM1	Decrease	Moazzam-Jazi M et al., 2021		HOTAIRM1		LINC02863				LINC02700	Decrease (severe vs nonsevere)	Cheng J et al., 2021														SNHG20	Increase	Moazzam-Jazi M et al., 2021
RORA-AS1	Decrease	PBMC	PBMC and BALF	Beijing Institute of Genomics (BIG) Data Center (accession number: CRA002390), originally published by Xiong Y et al., 2021	Re-analysis of RNA sequencing data published by Xiong Y et al., 2021		Major findings were (i) more than half of the interactions between lncRNAs‐PCGs of BALF samples established by trans‐acting lncRNA HOTAIRM1 (decreased in BALF), PVT1 (increased in BALF and novel transcript AL392172.1 (not observed in current version Ensembl or NCBI, increased), (ii) binding of several deregulated lncRNAs have been shown to bind with SARS-CoV-2 genome by computational tool; the 5′…	Moazzam-Jazi M et al., 2021							IATPR	Decrease (severe vs nonsevere)	Cheng J et al., 2021		IATPR		MEG9				LINC02728	Decrease	Moazzam-Jazi M et al., 2021														SNHG20	Decrease (severe vs nonsevere)	Cheng J et al., 2021
SCAT2	Decrease	PBMC	PBMC and BALF	Beijing Institute of Genomics (BIG) Data Center (accession number: CRA002390), originally published by Xiong Y et al., 2021	Re-analysis of RNA sequencing data published by Xiong Y et al., 2021		Major findings were (i) more than half of the interactions between lncRNAs‐PCGs of BALF samples established by trans‐acting lncRNA HOTAIRM1 (decreased in BALF), PVT1 (increased in BALF and novel transcript AL392172.1 (not observed in current version Ensembl or NCBI, increased), (ii) binding of several deregulated lncRNAs have been shown to bind with SARS-CoV-2 genome by computational tool; the 5′…	Moazzam-Jazi M et al., 2021							ILF3-DT	Decrease (severe vs nonsevere)	Cheng J et al., 2021		ILF3-DT		MINCR				LINC02728	Decrease (severe vs nonsevere)	Cheng J et al., 2021														ZNF674-AS1	Decrease (severe vs nonsevere)	Cheng J et al., 2021
SND1-IT1	Decrease	PBMC	PBMC and BALF	Beijing Institute of Genomics (BIG) Data Center (accession number: CRA002390), originally published by Xiong Y et al., 2021	Re-analysis of RNA sequencing data published by Xiong Y et al., 2021		Major findings were (i) more than half of the interactions between lncRNAs‐PCGs of BALF samples established by trans‐acting lncRNA HOTAIRM1 (decreased in BALF), PVT1 (increased in BALF and novel transcript AL392172.1 (not observed in current version Ensembl or NCBI, increased), (ii) binding of several deregulated lncRNAs have been shown to bind with SARS-CoV-2 genome by computational tool; the 5′…	Moazzam-Jazi M et al., 2021							IQCH-AS1	Decrease (severe vs nonsevere)	Cheng J et al., 2021		IQCH-AS1		MIR3945HG				MIAT	Decrease	Moazzam-Jazi M et al., 2021														ZNF674-AS1	Increased	Laha S et al., 2021
ST8SIA6-AS1	Decrease	PBMC	PBMC and BALF	Beijing Institute of Genomics (BIG) Data Center (accession number: CRA002390), originally published by Xiong Y et al., 2021	Re-analysis of RNA sequencing data published by Xiong Y et al., 2021		Major findings were (i) more than half of the interactions between lncRNAs‐PCGs of BALF samples established by trans‐acting lncRNA HOTAIRM1 (decreased in BALF), PVT1 (increased in BALF and novel transcript AL392172.1 (not observed in current version Ensembl or NCBI, increased), (ii) binding of several deregulated lncRNAs have been shown to bind with SARS-CoV-2 genome by computational tool; the 5′…	Moazzam-Jazi M et al., 2021							IRF1-AS1	Decrease (severe vs nonsevere)	Cheng J et al., 2021		IRF1-AS1		MIR4458HG				MIAT	Decrease (severe vs nonsevere)	Cheng J et al., 2021
ZBTB20-AS1	Decrease	PBMC	PBMC and BALF	Beijing Institute of Genomics (BIG) Data Center (accession number: CRA002390), originally published by Xiong Y et al., 2021	Re-analysis of RNA sequencing data published by Xiong Y et al., 2021		Major findings were (i) more than half of the interactions between lncRNAs‐PCGs of BALF samples established by trans‐acting lncRNA HOTAIRM1 (decreased in BALF), PVT1 (increased in BALF and novel transcript AL392172.1 (not observed in current version Ensembl or NCBI, increased), (ii) binding of several deregulated lncRNAs have been shown to bind with SARS-CoV-2 genome by computational tool; the 5′…	Moazzam-Jazi M et al., 2021							JPX	Decrease (severe vs nonsevere)	Cheng J et al., 2021		JPX		NRIR				MIR17HG	Decrease	Moazzam-Jazi M et al., 2021
ZNF528-AS1	Decrease	PBMC	PBMC and BALF	Beijing Institute of Genomics (BIG) Data Center (accession number: CRA002390), originally published by Xiong Y et al., 2021	Re-analysis of RNA sequencing data published by Xiong Y et al., 2021		Major findings were (i) more than half of the interactions between lncRNAs‐PCGs of BALF samples established by trans‐acting lncRNA HOTAIRM1 (decreased in BALF), PVT1 (increased in BALF and novel transcript AL392172.1 (not observed in current version Ensembl or NCBI, increased), (ii) binding of several deregulated lncRNAs have been shown to bind with SARS-CoV-2 genome by computational tool; the 5′…	Moazzam-Jazi M et al., 2021							KLF3-AS1	Decrease	Moazzam-Jazi M et al., 2021		KLF3-AS1		OTUD6B-AS1				MIR17HG	Decrease (severe vs nonsevere)	Cheng J et al., 2021
C5orf66	Increase	PBMC	PBMC and BALF	Beijing Institute of Genomics (BIG) Data Center (accession number: CRA002390), originally published by Xiong Y et al., 2021	Re-analysis of RNA sequencing data published by Xiong Y et al., 2021		Major findings were (i) more than half of the interactions between lncRNAs‐PCGs of BALF samples established by trans‐acting lncRNA HOTAIRM1 (decreased in BALF), PVT1 (increased in BALF and novel transcript AL392172.1 (not observed in current version Ensembl or NCBI, increased), (ii) binding of several deregulated lncRNAs have been shown to bind with SARS-CoV-2 genome by computational tool; the 5′…	Moazzam-Jazi M et al., 2021							KRT73-AS1	Decrease	Moazzam-Jazi M et al., 2021		KRT73-AS1		PAXIP1-AS2				MIRLET7A1HG	Decrease	Moazzam-Jazi M et al., 2021
CEBPA-DT	Increase	PBMC	PBMC and BALF	Beijing Institute of Genomics (BIG) Data Center (accession number: CRA002390), originally published by Xiong Y et al., 2021	Re-analysis of RNA sequencing data published by Xiong Y et al., 2021		Major findings were (i) more than half of the interactions between lncRNAs‐PCGs of BALF samples established by trans‐acting lncRNA HOTAIRM1 (decreased in BALF), PVT1 (increased in BALF and novel transcript AL392172.1 (not observed in current version Ensembl or NCBI, increased), (ii) binding of several deregulated lncRNAs have been shown to bind with SARS-CoV-2 genome by computational tool; the 5′…	Moazzam-Jazi M et al., 2021							KRTAP5-AS1	Decrease	Moazzam-Jazi M et al., 2021		KRTAP5-AS1		PCBP1-AS1				MIRLET7A1HG	Decrease (severe vs nonsevere)	Cheng J et al., 2021
CYP1B1-AS1	Increase	PBMC	PBMC and BALF	Beijing Institute of Genomics (BIG) Data Center (accession number: CRA002390), originally published by Xiong Y et al., 2021	Re-analysis of RNA sequencing data published by Xiong Y et al., 2021		Major findings were (i) more than half of the interactions between lncRNAs‐PCGs of BALF samples established by trans‐acting lncRNA HOTAIRM1 (decreased in BALF), PVT1 (increased in BALF and novel transcript AL392172.1 (not observed in current version Ensembl or NCBI, increased), (ii) binding of several deregulated lncRNAs have been shown to bind with SARS-CoV-2 genome by computational tool; the 5′…	Moazzam-Jazi M et al., 2021							LERFS	Decrease (severe vs nonsevere)	Cheng J et al., 2021		LERFS		RGPD4-AS1				PRKCQ-AS1	Decrease (COVID-ICU vs COVID NON-ICU )	Shaath H et al., 2021
FAM198B-AS1	Increase	PBMC	PBMC and BALF	Beijing Institute of Genomics (BIG) Data Center (accession number: CRA002390), originally published by Xiong Y et al., 2021	Re-analysis of RNA sequencing data published by Xiong Y et al., 2021		Major findings were (i) more than half of the interactions between lncRNAs‐PCGs of BALF samples established by trans‐acting lncRNA HOTAIRM1 (decreased in BALF), PVT1 (increased in BALF and novel transcript AL392172.1 (not observed in current version Ensembl or NCBI, increased), (ii) binding of several deregulated lncRNAs have been shown to bind with SARS-CoV-2 genome by computational tool; the 5′…	Moazzam-Jazi M et al., 2021							LINC00092	Decrease (severe vs nonsevere)	Cheng J et al., 2021		LINC00092		RMRP				PRKCQ-AS1	Decrease (severe vs nonsevere)	Cheng J et al., 2021
LINC00106	Increase	PBMC	PBMC and BALF	Beijing Institute of Genomics (BIG) Data Center (accession number: CRA002390), originally published by Xiong Y et al., 2021	Re-analysis of RNA sequencing data published by Xiong Y et al., 2021		Major findings were (i) more than half of the interactions between lncRNAs‐PCGs of BALF samples established by trans‐acting lncRNA HOTAIRM1 (decreased in BALF), PVT1 (increased in BALF and novel transcript AL392172.1 (not observed in current version Ensembl or NCBI, increased), (ii) binding of several deregulated lncRNAs have been shown to bind with SARS-CoV-2 genome by computational tool; the 5′…	Moazzam-Jazi M et al., 2021							LINC00205	Decrease	Moazzam-Jazi M et al., 2021		LINC00205		RNF185-AS1				SMIM25	Decrease	Moazzam-Jazi M et al., 2021
LINC00482	Increase	PBMC	PBMC and BALF	Beijing Institute of Genomics (BIG) Data Center (accession number: CRA002390), originally published by Xiong Y et al., 2021	Re-analysis of RNA sequencing data published by Xiong Y et al., 2021		Major findings were (i) more than half of the interactions between lncRNAs‐PCGs of BALF samples established by trans‐acting lncRNA HOTAIRM1 (decreased in BALF), PVT1 (increased in BALF and novel transcript AL392172.1 (not observed in current version Ensembl or NCBI, increased), (ii) binding of several deregulated lncRNAs have been shown to bind with SARS-CoV-2 genome by computational tool; the 5′…	Moazzam-Jazi M et al., 2021							LINC002481	Decrease	Moazzam-Jazi M et al., 2021		LINC002481		SCAT8				SMIM25	Decrease (COVID-non ICU vs Non-COVID-non ICU)	Shaath H et al., 2021
LINC01547	Increase	PBMC	PBMC and BALF	Beijing Institute of Genomics (BIG) Data Center (accession number: CRA002390), originally published by Xiong Y et al., 2021	Re-analysis of RNA sequencing data published by Xiong Y et al., 2021		Major findings were (i) more than half of the interactions between lncRNAs‐PCGs of BALF samples established by trans‐acting lncRNA HOTAIRM1 (decreased in BALF), PVT1 (increased in BALF and novel transcript AL392172.1 (not observed in current version Ensembl or NCBI, increased), (ii) binding of several deregulated lncRNAs have been shown to bind with SARS-CoV-2 genome by computational tool; the 5′…	Moazzam-Jazi M et al., 2021							LINC00304	Decrease (severe vs nonsevere)	Cheng J et al., 2021		LINC00304		SGMS1-AS1				SND1-IT1	Decrease	Moazzam-Jazi M et al., 2021
LINC02723	Increase	PBMC	PBMC and BALF	Beijing Institute of Genomics (BIG) Data Center (accession number: CRA002390), originally published by Xiong Y et al., 2021	Re-analysis of RNA sequencing data published by Xiong Y et al., 2021		Major findings were (i) more than half of the interactions between lncRNAs‐PCGs of BALF samples established by trans‐acting lncRNA HOTAIRM1 (decreased in BALF), PVT1 (increased in BALF and novel transcript AL392172.1 (not observed in current version Ensembl or NCBI, increased), (ii) binding of several deregulated lncRNAs have been shown to bind with SARS-CoV-2 genome by computational tool; the 5′…	Moazzam-Jazi M et al., 2021							LINC00310	Decrease (severe vs nonsevere)	Cheng J et al., 2021		LINC00310		SNHG14				SND1-IT1	Decrease (severe vs nonsevere)	Cheng J et al., 2021
LINC02724	Increase	PBMC	PBMC and BALF	Beijing Institute of Genomics (BIG) Data Center (accession number: CRA002390), originally published by Xiong Y et al., 2021	Re-analysis of RNA sequencing data published by Xiong Y et al., 2021		Major findings were (i) more than half of the interactions between lncRNAs‐PCGs of BALF samples established by trans‐acting lncRNA HOTAIRM1 (decreased in BALF), PVT1 (increased in BALF and novel transcript AL392172.1 (not observed in current version Ensembl or NCBI, increased), (ii) binding of several deregulated lncRNAs have been shown to bind with SARS-CoV-2 genome by computational tool; the 5′…	Moazzam-Jazi M et al., 2021							LINC00334	Decrease (severe vs nonsevere)	Cheng J et al., 2021		LINC00334		SNHG30				SNHG16	Decrease	Taheri M et al. 2021
LINC02777	Increase	PBMC	PBMC and BALF	Beijing Institute of Genomics (BIG) Data Center (accession number: CRA002390), originally published by Xiong Y et al., 2021	Re-analysis of RNA sequencing data published by Xiong Y et al., 2021		Major findings were (i) more than half of the interactions between lncRNAs‐PCGs of BALF samples established by trans‐acting lncRNA HOTAIRM1 (decreased in BALF), PVT1 (increased in BALF and novel transcript AL392172.1 (not observed in current version Ensembl or NCBI, increased), (ii) binding of several deregulated lncRNAs have been shown to bind with SARS-CoV-2 genome by computational tool; the 5′…	Moazzam-Jazi M et al., 2021							LINC00381	Decrease (severe vs nonsevere)	Cheng J et al., 2021		LINC00381		SOX21-AS1				SNHG16	Decrease (severe vs nonsevere)	Cheng J et al., 2021
LINC02785	Increase	PBMC	PBMC and BALF	Beijing Institute of Genomics (BIG) Data Center (accession number: CRA002390), originally published by Xiong Y et al., 2021	Re-analysis of RNA sequencing data published by Xiong Y et al., 2021		Major findings were (i) more than half of the interactions between lncRNAs‐PCGs of BALF samples established by trans‐acting lncRNA HOTAIRM1 (decreased in BALF), PVT1 (increased in BALF and novel transcript AL392172.1 (not observed in current version Ensembl or NCBI, increased), (ii) binding of several deregulated lncRNAs have been shown to bind with SARS-CoV-2 genome by computational tool; the 5′…	Moazzam-Jazi M et al., 2021							LINC00426	Decrease (severe vs nonsevere)	Cheng J et al., 2021		LINC00426		SPINT1-AS1				SNHG6	Decrease	Taheri M et al. 2021
MIR181A1HG	Increase	PBMC	PBMC and BALF	Beijing Institute of Genomics (BIG) Data Center (accession number: CRA002390), originally published by Xiong Y et al., 2021	Re-analysis of RNA sequencing data published by Xiong Y et al., 2021		Major findings were (i) more than half of the interactions between lncRNAs‐PCGs of BALF samples established by trans‐acting lncRNA HOTAIRM1 (decreased in BALF), PVT1 (increased in BALF and novel transcript AL392172.1 (not observed in current version Ensembl or NCBI, increased), (ii) binding of several deregulated lncRNAs have been shown to bind with SARS-CoV-2 genome by computational tool; the 5′…	Moazzam-Jazi M et al., 2021							LINC00427	Decrease (severe vs nonsevere)	Cheng J et al., 2021		LINC00427		SRGAP3-AS2				SNHG6	Decrease (severe vs nonsevere)	Cheng J et al., 2021
PAX8-AS1	Increase	PBMC	PBMC and BALF	Beijing Institute of Genomics (BIG) Data Center (accession number: CRA002390), originally published by Xiong Y et al., 2021	Re-analysis of RNA sequencing data published by Xiong Y et al., 2021		Major findings were (i) more than half of the interactions between lncRNAs‐PCGs of BALF samples established by trans‐acting lncRNA HOTAIRM1 (decreased in BALF), PVT1 (increased in BALF and novel transcript AL392172.1 (not observed in current version Ensembl or NCBI, increased), (ii) binding of several deregulated lncRNAs have been shown to bind with SARS-CoV-2 genome by computational tool; the 5′…	Moazzam-Jazi M et al., 2021							LINC00467	Decrease (severe vs nonsevere)	Cheng J et al., 2021		LINC00467		SRP14-AS1				SNHG8	Decrease (severe vs nonsevere)	Cheng J et al., 2021
A1BG-AS1	Decrease	BALF	PBMC and BALF	Beijing Institute of Genomics (BIG) Data Center (accession number: CRA002390), originally published by Xiong Y et al., 2021	Re-analysis of RNA sequencing data published by Xiong Y et al., 2021		Major findings were (i) more than half of the interactions between lncRNAs‐PCGs of BALF samples established by trans‐acting lncRNA HOTAIRM1 (decreased in BALF), PVT1 (increased in BALF and novel transcript AL392172.1 (not observed in current version Ensembl or NCBI, increased), (ii) binding of several deregulated lncRNAs have been shown to bind with SARS-CoV-2 genome by computational tool; the 5′…	Moazzam-Jazi M et al., 2021							LINC00469	Decrease (severe vs nonsevere)	Cheng J et al., 2021		LINC00469		STARD13-AS				SNHG8	Decreased	Turjya RR et al., 2020
ANKRD10-IT1	Decrease	BALF	PBMC and BALF	Beijing Institute of Genomics (BIG) Data Center (accession number: CRA002390), originally published by Xiong Y et al., 2021	Re-analysis of RNA sequencing data published by Xiong Y et al., 2021		Major findings were (i) more than half of the interactions between lncRNAs‐PCGs of BALF samples established by trans‐acting lncRNA HOTAIRM1 (decreased in BALF), PVT1 (increased in BALF and novel transcript AL392172.1 (not observed in current version Ensembl or NCBI, increased), (ii) binding of several deregulated lncRNAs have been shown to bind with SARS-CoV-2 genome by computational tool; the 5′…	Moazzam-Jazi M et al., 2021							LINC00476	Decrease (severe vs nonsevere)	Cheng J et al., 2021		LINC00476		TERC				TP53TG1	Decrease (severe vs nonsevere)	Cheng J et al., 2021
ARRDC1-AS1	Decrease	BALF	PBMC and BALF	Beijing Institute of Genomics (BIG) Data Center (accession number: CRA002390), originally published by Xiong Y et al., 2021	Re-analysis of RNA sequencing data published by Xiong Y et al., 2021		Major findings were (i) more than half of the interactions between lncRNAs‐PCGs of BALF samples established by trans‐acting lncRNA HOTAIRM1 (decreased in BALF), PVT1 (increased in BALF and novel transcript AL392172.1 (not observed in current version Ensembl or NCBI, increased), (ii) binding of several deregulated lncRNAs have been shown to bind with SARS-CoV-2 genome by computational tool; the 5′…	Moazzam-Jazi M et al., 2021							LINC00487	Decrease (severe vs nonsevere)	Cheng J et al., 2021		LINC00487		THAP9-AS1				TP53TG1	Decreased	Laha S et al., 2021
ASB16-AS1	Decrease	BALF	PBMC and BALF	Beijing Institute of Genomics (BIG) Data Center (accession number: CRA002390), originally published by Xiong Y et al., 2021	Re-analysis of RNA sequencing data published by Xiong Y et al., 2021		Major findings were (i) more than half of the interactions between lncRNAs‐PCGs of BALF samples established by trans‐acting lncRNA HOTAIRM1 (decreased in BALF), PVT1 (increased in BALF and novel transcript AL392172.1 (not observed in current version Ensembl or NCBI, increased), (ii) binding of several deregulated lncRNAs have been shown to bind with SARS-CoV-2 genome by computational tool; the 5′…	Moazzam-Jazi M et al., 2021							LINC00488	Decreased	Laha S et al., 2021		LINC00488		TMEM44-AS1				TRBV11-2	Decrease (COVID-ICU vs COVID NON-ICU )	Shaath H et al., 2021
BAIAP2-DT	Decrease	BALF	PBMC and BALF	Beijing Institute of Genomics (BIG) Data Center (accession number: CRA002390), originally published by Xiong Y et al., 2021	Re-analysis of RNA sequencing data published by Xiong Y et al., 2021		Major findings were (i) more than half of the interactions between lncRNAs‐PCGs of BALF samples established by trans‐acting lncRNA HOTAIRM1 (decreased in BALF), PVT1 (increased in BALF and novel transcript AL392172.1 (not observed in current version Ensembl or NCBI, increased), (ii) binding of several deregulated lncRNAs have been shown to bind with SARS-CoV-2 genome by computational tool; the 5′…	Moazzam-Jazi M et al., 2021							LINC00494	Decrease (severe vs nonsevere)	Cheng J et al., 2021		LINC00494		TOSL(TNFAIP3-oppositestrandlncRNA,notcataloguedinNCBIandEnsembldatabase				TRBV11-2	Decrease (severe vs nonsevere)	Cheng J et al., 2021
C10orf25	Decrease	BALF	PBMC and BALF	Beijing Institute of Genomics (BIG) Data Center (accession number: CRA002390), originally published by Xiong Y et al., 2021	Re-analysis of RNA sequencing data published by Xiong Y et al., 2021		Major findings were (i) more than half of the interactions between lncRNAs‐PCGs of BALF samples established by trans‐acting lncRNA HOTAIRM1 (decreased in BALF), PVT1 (increased in BALF and novel transcript AL392172.1 (not observed in current version Ensembl or NCBI, increased), (ii) binding of several deregulated lncRNAs have been shown to bind with SARS-CoV-2 genome by computational tool; the 5′…	Moazzam-Jazi M et al., 2021							LINC00513	Decrease	Moazzam-Jazi M et al., 2021		LINC00513		TRAM2-AS1				ZNF528-AS1	Decrease	Moazzam-Jazi M et al., 2021
C1RL-AS1	Decrease	BALF	PBMC and BALF	Beijing Institute of Genomics (BIG) Data Center (accession number: CRA002390), originally published by Xiong Y et al., 2021	Re-analysis of RNA sequencing data published by Xiong Y et al., 2021		Major findings were (i) more than half of the interactions between lncRNAs‐PCGs of BALF samples established by trans‐acting lncRNA HOTAIRM1 (decreased in BALF), PVT1 (increased in BALF and novel transcript AL392172.1 (not observed in current version Ensembl or NCBI, increased), (ii) binding of several deregulated lncRNAs have been shown to bind with SARS-CoV-2 genome by computational tool; the 5′…	Moazzam-Jazi M et al., 2021							LINC00526	Decrease (severe vs nonsevere)	Cheng J et al., 2021		LINC00526		TRIM52-AS1				ZNF528-AS1	Decrease (severe vs nonsevere)	Cheng J et al., 2021
C22orf34	Decrease	BALF	PBMC and BALF	Beijing Institute of Genomics (BIG) Data Center (accession number: CRA002390), originally published by Xiong Y et al., 2021	Re-analysis of RNA sequencing data published by Xiong Y et al., 2021		Major findings were (i) more than half of the interactions between lncRNAs‐PCGs of BALF samples established by trans‐acting lncRNA HOTAIRM1 (decreased in BALF), PVT1 (increased in BALF and novel transcript AL392172.1 (not observed in current version Ensembl or NCBI, increased), (ii) binding of several deregulated lncRNAs have been shown to bind with SARS-CoV-2 genome by computational tool; the 5′…	Moazzam-Jazi M et al., 2021							LINC00544	Decrease (severe vs nonsevere)	Cheng J et al., 2021		LINC00544		TTN-AS1				C5orf66	Increase	Moazzam-Jazi M et al., 2021
C9orf139	Decrease	BALF	PBMC and BALF	Beijing Institute of Genomics (BIG) Data Center (accession number: CRA002390), originally published by Xiong Y et al., 2021	Re-analysis of RNA sequencing data published by Xiong Y et al., 2021		Major findings were (i) more than half of the interactions between lncRNAs‐PCGs of BALF samples established by trans‐acting lncRNA HOTAIRM1 (decreased in BALF), PVT1 (increased in BALF and novel transcript AL392172.1 (not observed in current version Ensembl or NCBI, increased), (ii) binding of several deregulated lncRNAs have been shown to bind with SARS-CoV-2 genome by computational tool; the 5′…	Moazzam-Jazi M et al., 2021							LINC00562	Decrease (severe vs nonsevere)	Cheng J et al., 2021		LINC00562		TUG1				C5orf66	Increase (COVID-non ICU vs Non-COVID-non ICU)	Shaath H et al., 2021
CD27-AS1	Decrease	BALF	PBMC and BALF	Beijing Institute of Genomics (BIG) Data Center (accession number: CRA002390), originally published by Xiong Y et al., 2021	Re-analysis of RNA sequencing data published by Xiong Y et al., 2021		Major findings were (i) more than half of the interactions between lncRNAs‐PCGs of BALF samples established by trans‐acting lncRNA HOTAIRM1 (decreased in BALF), PVT1 (increased in BALF and novel transcript AL392172.1 (not observed in current version Ensembl or NCBI, increased), (ii) binding of several deregulated lncRNAs have been shown to bind with SARS-CoV-2 genome by computational tool; the 5′…	Moazzam-Jazi M et al., 2021							LINC00563	Decrease (severe vs nonsevere)	Cheng J et al., 2021		LINC00563		UBA6-AS1				CFLAR-AS1/ENSG00000226312.7	Increase (A549 cells)	Mukherjee S et al., 2021
CD2BP2-DT	Decrease	BALF	PBMC and BALF	Beijing Institute of Genomics (BIG) Data Center (accession number: CRA002390), originally published by Xiong Y et al., 2021	Re-analysis of RNA sequencing data published by Xiong Y et al., 2021		Major findings were (i) more than half of the interactions between lncRNAs‐PCGs of BALF samples established by trans‐acting lncRNA HOTAIRM1 (decreased in BALF), PVT1 (increased in BALF and novel transcript AL392172.1 (not observed in current version Ensembl or NCBI, increased), (ii) binding of several deregulated lncRNAs have been shown to bind with SARS-CoV-2 genome by computational tool; the 5′…	Moazzam-Jazi M et al., 2021							LINC00565	Decrease (severe vs nonsevere)	Cheng J et al., 2021		LINC00565		WARS2-AS1				CFLAR-AS1/ENSG00000226312.7	Increase (Calu cells)	Mukherjee S et al., 2021
CHRM3-AS2	Decrease	BALF	PBMC and BALF	Beijing Institute of Genomics (BIG) Data Center (accession number: CRA002390), originally published by Xiong Y et al., 2021	Re-analysis of RNA sequencing data published by Xiong Y et al., 2021		Major findings were (i) more than half of the interactions between lncRNAs‐PCGs of BALF samples established by trans‐acting lncRNA HOTAIRM1 (decreased in BALF), PVT1 (increased in BALF and novel transcript AL392172.1 (not observed in current version Ensembl or NCBI, increased), (ii) binding of several deregulated lncRNAs have been shown to bind with SARS-CoV-2 genome by computational tool; the 5′…	Moazzam-Jazi M et al., 2021							LINC00598	Decrease (severe vs nonsevere)	Cheng J et al., 2021		LINC00598		ZEB2-AS1				EGOT	Increased	Laha S et al., 2021
EML4-AS1	Decrease	BALF	PBMC and BALF	Beijing Institute of Genomics (BIG) Data Center (accession number: CRA002390), originally published by Xiong Y et al., 2021	Re-analysis of RNA sequencing data published by Xiong Y et al., 2021		Major findings were (i) more than half of the interactions between lncRNAs‐PCGs of BALF samples established by trans‐acting lncRNA HOTAIRM1 (decreased in BALF), PVT1 (increased in BALF and novel transcript AL392172.1 (not observed in current version Ensembl or NCBI, increased), (ii) binding of several deregulated lncRNAs have been shown to bind with SARS-CoV-2 genome by computational tool; the 5′…	Moazzam-Jazi M et al., 2021							LINC00612	Decrease	Moazzam-Jazi M et al., 2021		LINC00612		ZFAS1				EGOT/ENSG00000235947.1	Increase (A549 cells)	Mukherjee S et al., 2021
FAM106A	Decrease	BALF	PBMC and BALF	Beijing Institute of Genomics (BIG) Data Center (accession number: CRA002390), originally published by Xiong Y et al., 2021	Re-analysis of RNA sequencing data published by Xiong Y et al., 2021		Major findings were (i) more than half of the interactions between lncRNAs‐PCGs of BALF samples established by trans‐acting lncRNA HOTAIRM1 (decreased in BALF), PVT1 (increased in BALF and novel transcript AL392172.1 (not observed in current version Ensembl or NCBI, increased), (ii) binding of several deregulated lncRNAs have been shown to bind with SARS-CoV-2 genome by computational tool; the 5′…	Moazzam-Jazi M et al., 2021							LINC00623	Decrease	Moazzam-Jazi M et al., 2021		LINC00623		ZNF667-AS1				EGOT/ENSG00000235947.1	Increase (BALF)	Mukherjee S et al., 2021
FGD5-AS1	Decrease	BALF	PBMC and BALF	Beijing Institute of Genomics (BIG) Data Center (accession number: CRA002390), originally published by Xiong Y et al., 2021	Re-analysis of RNA sequencing data published by Xiong Y et al., 2021		Major findings were (i) more than half of the interactions between lncRNAs‐PCGs of BALF samples established by trans‐acting lncRNA HOTAIRM1 (decreased in BALF), PVT1 (increased in BALF and novel transcript AL392172.1 (not observed in current version Ensembl or NCBI, increased), (ii) binding of several deregulated lncRNAs have been shown to bind with SARS-CoV-2 genome by computational tool; the 5′…	Moazzam-Jazi M et al., 2021							LINC00641	Decrease (severe vs nonsevere)	Cheng J et al., 2021		LINC00641		ZSCAN16-AS1				EGOT/ENSG00000235947.1	Increase (Calu cells)	Mukherjee S et al., 2021
GSN-AS1	Decrease	BALF	PBMC and BALF	Beijing Institute of Genomics (BIG) Data Center (accession number: CRA002390), originally published by Xiong Y et al., 2021	Re-analysis of RNA sequencing data published by Xiong Y et al., 2021		Major findings were (i) more than half of the interactions between lncRNAs‐PCGs of BALF samples established by trans‐acting lncRNA HOTAIRM1 (decreased in BALF), PVT1 (increased in BALF and novel transcript AL392172.1 (not observed in current version Ensembl or NCBI, increased), (ii) binding of several deregulated lncRNAs have been shown to bind with SARS-CoV-2 genome by computational tool; the 5′…	Moazzam-Jazi M et al., 2021							LINC00653	Decrease (severe vs nonsevere)	Cheng J et al., 2021		LINC00653						EIF2AK3-DT/ENSG00000234028.3	Increase (A549 cells)	Mukherjee S et al., 2021
HOTAIRM1	Decrease	BALF	PBMC and BALF	Beijing Institute of Genomics (BIG) Data Center (accession number: CRA002390), originally published by Xiong Y et al., 2021	Re-analysis of RNA sequencing data published by Xiong Y et al., 2021		Major findings were (i) more than half of the interactions between lncRNAs‐PCGs of BALF samples established by trans‐acting lncRNA HOTAIRM1 (decreased in BALF), PVT1 (increased in BALF and novel transcript AL392172.1 (not observed in current version Ensembl or NCBI, increased), (ii) binding of several deregulated lncRNAs have been shown to bind with SARS-CoV-2 genome by computational tool; the 5′…	Moazzam-Jazi M et al., 2021							LINC00654	Decrease	Moazzam-Jazi M et al., 2021		LINC00654						EIF2AK3-DT/ENSG00000234028.3	Increase (Calu cells)	Mukherjee S et al., 2021
LINC00205	Decrease	BALF	PBMC and BALF	Beijing Institute of Genomics (BIG) Data Center (accession number: CRA002390), originally published by Xiong Y et al., 2021	Re-analysis of RNA sequencing data published by Xiong Y et al., 2021		Major findings were (i) more than half of the interactions between lncRNAs‐PCGs of BALF samples established by trans‐acting lncRNA HOTAIRM1 (decreased in BALF), PVT1 (increased in BALF and novel transcript AL392172.1 (not observed in current version Ensembl or NCBI, increased), (ii) binding of several deregulated lncRNAs have been shown to bind with SARS-CoV-2 genome by computational tool; the 5′…	Moazzam-Jazi M et al., 2021							LINC00656	Decrease	Moazzam-Jazi M et al., 2021		LINC00656						EPB41L4A-AS1	Increase	Moazzam-Jazi M et al., 2021
LINC00654	Decrease	BALF	PBMC and BALF	Beijing Institute of Genomics (BIG) Data Center (accession number: CRA002390), originally published by Xiong Y et al., 2021	Re-analysis of RNA sequencing data published by Xiong Y et al., 2021		Major findings were (i) more than half of the interactions between lncRNAs‐PCGs of BALF samples established by trans‐acting lncRNA HOTAIRM1 (decreased in BALF), PVT1 (increased in BALF and novel transcript AL392172.1 (not observed in current version Ensembl or NCBI, increased), (ii) binding of several deregulated lncRNAs have been shown to bind with SARS-CoV-2 genome by computational tool; the 5′…	Moazzam-Jazi M et al., 2021							LINC00663	Decrease (severe vs nonsevere)	Cheng J et al., 2021		LINC00663						EPB41L4A-AS1	Increased	Laha S et al., 2021
LINC00656	Decrease	BALF	PBMC and BALF	Beijing Institute of Genomics (BIG) Data Center (accession number: CRA002390), originally published by Xiong Y et al., 2021	Re-analysis of RNA sequencing data published by Xiong Y et al., 2021		Major findings were (i) more than half of the interactions between lncRNAs‐PCGs of BALF samples established by trans‐acting lncRNA HOTAIRM1 (decreased in BALF), PVT1 (increased in BALF and novel transcript AL392172.1 (not observed in current version Ensembl or NCBI, increased), (ii) binding of several deregulated lncRNAs have been shown to bind with SARS-CoV-2 genome by computational tool; the 5′…	Moazzam-Jazi M et al., 2021							LINC00664	Decrease (severe vs nonsevere)	Cheng J et al., 2021		LINC00664						EPB41L4A-AS1/ENSG00000224032.7	Increase (A549 cells)	Mukherjee S et al., 2021
LINC00861	Decrease	BALF	PBMC and BALF	Beijing Institute of Genomics (BIG) Data Center (accession number: CRA002390), originally published by Xiong Y et al., 2021	Re-analysis of RNA sequencing data published by Xiong Y et al., 2021		Major findings were (i) more than half of the interactions between lncRNAs‐PCGs of BALF samples established by trans‐acting lncRNA HOTAIRM1 (decreased in BALF), PVT1 (increased in BALF and novel transcript AL392172.1 (not observed in current version Ensembl or NCBI, increased), (ii) binding of several deregulated lncRNAs have been shown to bind with SARS-CoV-2 genome by computational tool; the 5′…	Moazzam-Jazi M et al., 2021							LINC00665	Decrease (severe vs nonsevere)	Cheng J et al., 2021		LINC00665						EPB41L4A-AS1/ENSG00000224032.7	Increase (Calu cells)	Mukherjee S et al., 2021
LINC00863	Decrease	BALF	PBMC and BALF	Beijing Institute of Genomics (BIG) Data Center (accession number: CRA002390), originally published by Xiong Y et al., 2021	Re-analysis of RNA sequencing data published by Xiong Y et al., 2021		Major findings were (i) more than half of the interactions between lncRNAs‐PCGs of BALF samples established by trans‐acting lncRNA HOTAIRM1 (decreased in BALF), PVT1 (increased in BALF and novel transcript AL392172.1 (not observed in current version Ensembl or NCBI, increased), (ii) binding of several deregulated lncRNAs have been shown to bind with SARS-CoV-2 genome by computational tool; the 5′…	Moazzam-Jazi M et al., 2021							LINC00667	Decrease (severe vs nonsevere)	Cheng J et al., 2021		LINC00667						IRF2-DT/ENSG00000271646.1	Increase (A549 cells)	Mukherjee S et al., 2021
LINC00899	Decrease	BALF	PBMC and BALF	Beijing Institute of Genomics (BIG) Data Center (accession number: CRA002390), originally published by Xiong Y et al., 2021	Re-analysis of RNA sequencing data published by Xiong Y et al., 2021		Major findings were (i) more than half of the interactions between lncRNAs‐PCGs of BALF samples established by trans‐acting lncRNA HOTAIRM1 (decreased in BALF), PVT1 (increased in BALF and novel transcript AL392172.1 (not observed in current version Ensembl or NCBI, increased), (ii) binding of several deregulated lncRNAs have been shown to bind with SARS-CoV-2 genome by computational tool; the 5′…	Moazzam-Jazi M et al., 2021							LINC00824	Decrease (severe vs nonsevere)	Cheng J et al., 2021		LINC00824						IRF2-DT/ENSG00000271646.1	Increase (Calu cells)	Mukherjee S et al., 2021
LINC00937	Decrease	BALF	PBMC and BALF	Beijing Institute of Genomics (BIG) Data Center (accession number: CRA002390), originally published by Xiong Y et al., 2021	Re-analysis of RNA sequencing data published by Xiong Y et al., 2021		Major findings were (i) more than half of the interactions between lncRNAs‐PCGs of BALF samples established by trans‐acting lncRNA HOTAIRM1 (decreased in BALF), PVT1 (increased in BALF and novel transcript AL392172.1 (not observed in current version Ensembl or NCBI, increased), (ii) binding of several deregulated lncRNAs have been shown to bind with SARS-CoV-2 genome by computational tool; the 5′…	Moazzam-Jazi M et al., 2021							LINC00847	Decrease (severe vs nonsevere)	Cheng J et al., 2021		LINC00847						LINC00174	Increase (COVID-non ICU vs Non-COVID-non ICU)	Shaath H et al., 2021
LINC01089	Decrease	BALF	PBMC and BALF	Beijing Institute of Genomics (BIG) Data Center (accession number: CRA002390), originally published by Xiong Y et al., 2021	Re-analysis of RNA sequencing data published by Xiong Y et al., 2021		Major findings were (i) more than half of the interactions between lncRNAs‐PCGs of BALF samples established by trans‐acting lncRNA HOTAIRM1 (decreased in BALF), PVT1 (increased in BALF and novel transcript AL392172.1 (not observed in current version Ensembl or NCBI, increased), (ii) binding of several deregulated lncRNAs have been shown to bind with SARS-CoV-2 genome by computational tool; the 5′…	Moazzam-Jazi M et al., 2021							LINC00857	Decreased	Laha S et al., 2021		LINC00857						LINC00174	Increased	Laha S et al., 2021
LINC01168	Decrease	BALF	PBMC and BALF	Beijing Institute of Genomics (BIG) Data Center (accession number: CRA002390), originally published by Xiong Y et al., 2021	Re-analysis of RNA sequencing data published by Xiong Y et al., 2021		Major findings were (i) more than half of the interactions between lncRNAs‐PCGs of BALF samples established by trans‐acting lncRNA HOTAIRM1 (decreased in BALF), PVT1 (increased in BALF and novel transcript AL392172.1 (not observed in current version Ensembl or NCBI, increased), (ii) binding of several deregulated lncRNAs have been shown to bind with SARS-CoV-2 genome by computational tool; the 5′…	Moazzam-Jazi M et al., 2021							LINC00863	Decrease	Moazzam-Jazi M et al., 2021		LINC00863						LINC00265	Increase	Moazzam-Jazi M et al., 2021
LINC01503	Decrease	BALF	PBMC and BALF	Beijing Institute of Genomics (BIG) Data Center (accession number: CRA002390), originally published by Xiong Y et al., 2021	Re-analysis of RNA sequencing data published by Xiong Y et al., 2021		Major findings were (i) more than half of the interactions between lncRNAs‐PCGs of BALF samples established by trans‐acting lncRNA HOTAIRM1 (decreased in BALF), PVT1 (increased in BALF and novel transcript AL392172.1 (not observed in current version Ensembl or NCBI, increased), (ii) binding of several deregulated lncRNAs have been shown to bind with SARS-CoV-2 genome by computational tool; the 5′…	Moazzam-Jazi M et al., 2021							LINC00866	Decrease (severe vs nonsevere)	Cheng J et al., 2021		LINC00866						LINC00265	Increased	Laha S et al., 2021
LINC01948	Decrease	BALF	PBMC and BALF	Beijing Institute of Genomics (BIG) Data Center (accession number: CRA002390), originally published by Xiong Y et al., 2021	Re-analysis of RNA sequencing data published by Xiong Y et al., 2021		Major findings were (i) more than half of the interactions between lncRNAs‐PCGs of BALF samples established by trans‐acting lncRNA HOTAIRM1 (decreased in BALF), PVT1 (increased in BALF and novel transcript AL392172.1 (not observed in current version Ensembl or NCBI, increased), (ii) binding of several deregulated lncRNAs have been shown to bind with SARS-CoV-2 genome by computational tool; the 5′…	Moazzam-Jazi M et al., 2021							LINC00877	Decrease (severe vs nonsevere)	Cheng J et al., 2021		LINC00877						LINC01127	Increase (COVID-ICU vs COVID NON-ICU )	Shaath H et al., 2021
LINC02154	Decrease	BALF	PBMC and BALF	Beijing Institute of Genomics (BIG) Data Center (accession number: CRA002390), originally published by Xiong Y et al., 2021	Re-analysis of RNA sequencing data published by Xiong Y et al., 2021		Major findings were (i) more than half of the interactions between lncRNAs‐PCGs of BALF samples established by trans‐acting lncRNA HOTAIRM1 (decreased in BALF), PVT1 (increased in BALF and novel transcript AL392172.1 (not observed in current version Ensembl or NCBI, increased), (ii) binding of several deregulated lncRNAs have been shown to bind with SARS-CoV-2 genome by computational tool; the 5′…	Moazzam-Jazi M et al., 2021							LINC00891	Decrease (severe vs nonsevere)	Cheng J et al., 2021		LINC00891						LINC01127	Increase (severe vs non severe)	Cheng J et al., 2021
LINC02577	Decrease	BALF	PBMC and BALF	Beijing Institute of Genomics (BIG) Data Center (accession number: CRA002390), originally published by Xiong Y et al., 2021	Re-analysis of RNA sequencing data published by Xiong Y et al., 2021		Major findings were (i) more than half of the interactions between lncRNAs‐PCGs of BALF samples established by trans‐acting lncRNA HOTAIRM1 (decreased in BALF), PVT1 (increased in BALF and novel transcript AL392172.1 (not observed in current version Ensembl or NCBI, increased), (ii) binding of several deregulated lncRNAs have been shown to bind with SARS-CoV-2 genome by computational tool; the 5′…	Moazzam-Jazi M et al., 2021							LINC00892	Decrease	Moazzam-Jazi M et al., 2021		LINC00892						LINC01184	Increase	Moazzam-Jazi M et al., 2021
LINC02604	Decrease	BALF	PBMC and BALF	Beijing Institute of Genomics (BIG) Data Center (accession number: CRA002390), originally published by Xiong Y et al., 2021	Re-analysis of RNA sequencing data published by Xiong Y et al., 2021		Major findings were (i) more than half of the interactions between lncRNAs‐PCGs of BALF samples established by trans‐acting lncRNA HOTAIRM1 (decreased in BALF), PVT1 (increased in BALF and novel transcript AL392172.1 (not observed in current version Ensembl or NCBI, increased), (ii) binding of several deregulated lncRNAs have been shown to bind with SARS-CoV-2 genome by computational tool; the 5′…	Moazzam-Jazi M et al., 2021							LINC00899	Decrease	Moazzam-Jazi M et al., 2021		LINC00899						LINC01619/ENSG00000257242.8	Increase (A549 cells)	Mukherjee S et al., 2021
LINC02700	Decrease	BALF	PBMC and BALF	Beijing Institute of Genomics (BIG) Data Center (accession number: CRA002390), originally published by Xiong Y et al., 2021	Re-analysis of RNA sequencing data published by Xiong Y et al., 2021		Major findings were (i) more than half of the interactions between lncRNAs‐PCGs of BALF samples established by trans‐acting lncRNA HOTAIRM1 (decreased in BALF), PVT1 (increased in BALF and novel transcript AL392172.1 (not observed in current version Ensembl or NCBI, increased), (ii) binding of several deregulated lncRNAs have been shown to bind with SARS-CoV-2 genome by computational tool; the 5′…	Moazzam-Jazi M et al., 2021							LINC00920	Decrease (severe vs nonsevere)	Cheng J et al., 2021		LINC00920						LINC01619/ENSG00000257242.8	Increase (Calu cells)	Mukherjee S et al., 2021
MIAT	Decrease	BALF	PBMC and BALF	Beijing Institute of Genomics (BIG) Data Center (accession number: CRA002390), originally published by Xiong Y et al., 2021	Re-analysis of RNA sequencing data published by Xiong Y et al., 2021		Major findings were (i) more than half of the interactions between lncRNAs‐PCGs of BALF samples established by trans‐acting lncRNA HOTAIRM1 (decreased in BALF), PVT1 (increased in BALF and novel transcript AL392172.1 (not observed in current version Ensembl or NCBI, increased), (ii) binding of several deregulated lncRNAs have been shown to bind with SARS-CoV-2 genome by computational tool; the 5′…	Moazzam-Jazi M et al., 2021							LINC00926	Decrease (severe vs nonsevere)	Cheng J et al., 2021		LINC00926						LINC02207	Increase (COVID-ICU vs COVID NON-ICU )	Shaath H et al., 2021
MIRLET7A1HG	Decrease	BALF	PBMC and BALF	Beijing Institute of Genomics (BIG) Data Center (accession number: CRA002390), originally published by Xiong Y et al., 2021	Re-analysis of RNA sequencing data published by Xiong Y et al., 2021		Major findings were (i) more than half of the interactions between lncRNAs‐PCGs of BALF samples established by trans‐acting lncRNA HOTAIRM1 (decreased in BALF), PVT1 (increased in BALF and novel transcript AL392172.1 (not observed in current version Ensembl or NCBI, increased), (ii) binding of several deregulated lncRNAs have been shown to bind with SARS-CoV-2 genome by computational tool; the 5′…	Moazzam-Jazi M et al., 2021							LINC00937	Decrease	Moazzam-Jazi M et al., 2021		LINC00937						LINC02207	Increase (severe vs non severe)	Cheng J et al., 2021
MRPL20-AS1	Decrease	BALF	PBMC and BALF	Beijing Institute of Genomics (BIG) Data Center (accession number: CRA002390), originally published by Xiong Y et al., 2021	Re-analysis of RNA sequencing data published by Xiong Y et al., 2021		Major findings were (i) more than half of the interactions between lncRNAs‐PCGs of BALF samples established by trans‐acting lncRNA HOTAIRM1 (decreased in BALF), PVT1 (increased in BALF and novel transcript AL392172.1 (not observed in current version Ensembl or NCBI, increased), (ii) binding of several deregulated lncRNAs have been shown to bind with SARS-CoV-2 genome by computational tool; the 5′…	Moazzam-Jazi M et al., 2021							LINC00940	Decrease (severe vs nonsevere)	Cheng J et al., 2021		LINC00940						LINC02289	Increase (COVID-ICU vs COVID NON-ICU )	Shaath H et al., 2021
NALCN-AS1	Decrease	BALF	PBMC and BALF	Beijing Institute of Genomics (BIG) Data Center (accession number: CRA002390), originally published by Xiong Y et al., 2021	Re-analysis of RNA sequencing data published by Xiong Y et al., 2021		Major findings were (i) more than half of the interactions between lncRNAs‐PCGs of BALF samples established by trans‐acting lncRNA HOTAIRM1 (decreased in BALF), PVT1 (increased in BALF and novel transcript AL392172.1 (not observed in current version Ensembl or NCBI, increased), (ii) binding of several deregulated lncRNAs have been shown to bind with SARS-CoV-2 genome by computational tool; the 5′…	Moazzam-Jazi M et al., 2021							LINC00943	Decrease	Moazzam-Jazi M et al., 2021		LINC00943						LINC02289	Increase (severe vs non severe)	Cheng J et al., 2021
PAX8-AS1	Decrease	BALF	PBMC and BALF	Beijing Institute of Genomics (BIG) Data Center (accession number: CRA002390), originally published by Xiong Y et al., 2021	Re-analysis of RNA sequencing data published by Xiong Y et al., 2021		Major findings were (i) more than half of the interactions between lncRNAs‐PCGs of BALF samples established by trans‐acting lncRNA HOTAIRM1 (decreased in BALF), PVT1 (increased in BALF and novel transcript AL392172.1 (not observed in current version Ensembl or NCBI, increased), (ii) binding of several deregulated lncRNAs have been shown to bind with SARS-CoV-2 genome by computational tool; the 5′…	Moazzam-Jazi M et al., 2021							LINC00954	Decrease (severe vs nonsevere)	Cheng J et al., 2021		LINC00954						MALAT1	Increase	Moazzam-Jazi M et al., 2021
PSMG3-AS1	Decrease	BALF	PBMC and BALF	Beijing Institute of Genomics (BIG) Data Center (accession number: CRA002390), originally published by Xiong Y et al., 2021	Re-analysis of RNA sequencing data published by Xiong Y et al., 2021		Major findings were (i) more than half of the interactions between lncRNAs‐PCGs of BALF samples established by trans‐acting lncRNA HOTAIRM1 (decreased in BALF), PVT1 (increased in BALF and novel transcript AL392172.1 (not observed in current version Ensembl or NCBI, increased), (ii) binding of several deregulated lncRNAs have been shown to bind with SARS-CoV-2 genome by computational tool; the 5′…	Moazzam-Jazi M et al., 2021							LINC00996	Decrease (severe vs nonsevere)	Cheng J et al., 2021		LINC00996						MALAT1	Increased	Laha S et al., 2021
PTOV1-AS2	Decrease	BALF	PBMC and BALF	Beijing Institute of Genomics (BIG) Data Center (accession number: CRA002390), originally published by Xiong Y et al., 2021	Re-analysis of RNA sequencing data published by Xiong Y et al., 2021		Major findings were (i) more than half of the interactions between lncRNAs‐PCGs of BALF samples established by trans‐acting lncRNA HOTAIRM1 (decreased in BALF), PVT1 (increased in BALF and novel transcript AL392172.1 (not observed in current version Ensembl or NCBI, increased), (ii) binding of several deregulated lncRNAs have been shown to bind with SARS-CoV-2 genome by computational tool; the 5′…	Moazzam-Jazi M et al., 2021							LINC01013	Decrease (severe vs nonsevere)	Cheng J et al., 2021		LINC01013						MALAT1/ENSG00000251562.8	Increase (A549 cells)	Mukherjee S et al., 2021
SH3BP5-AS1	Decrease	BALF	PBMC and BALF	Beijing Institute of Genomics (BIG) Data Center (accession number: CRA002390), originally published by Xiong Y et al., 2021	Re-analysis of RNA sequencing data published by Xiong Y et al., 2021		Major findings were (i) more than half of the interactions between lncRNAs‐PCGs of BALF samples established by trans‐acting lncRNA HOTAIRM1 (decreased in BALF), PVT1 (increased in BALF and novel transcript AL392172.1 (not observed in current version Ensembl or NCBI, increased), (ii) binding of several deregulated lncRNAs have been shown to bind with SARS-CoV-2 genome by computational tool; the 5′…	Moazzam-Jazi M et al., 2021							LINC01135	Decrease (severe vs nonsevere)	Cheng J et al., 2021		LINC01135						MALAT1/ENSG00000251562.8	Increase (Calu cells)	Mukherjee S et al., 2021
SMIM25	Decrease	BALF	PBMC and BALF	Beijing Institute of Genomics (BIG) Data Center (accession number: CRA002390), originally published by Xiong Y et al., 2021	Re-analysis of RNA sequencing data published by Xiong Y et al., 2021		Major findings were (i) more than half of the interactions between lncRNAs‐PCGs of BALF samples established by trans‐acting lncRNA HOTAIRM1 (decreased in BALF), PVT1 (increased in BALF and novel transcript AL392172.1 (not observed in current version Ensembl or NCBI, increased), (ii) binding of several deregulated lncRNAs have been shown to bind with SARS-CoV-2 genome by computational tool; the 5′…	Moazzam-Jazi M et al., 2021							LINC01154	Decrease (severe vs nonsevere)	Cheng J et al., 2021		LINC01154						MEG3	Increased	Turjya RR et al., 2020
SNHG29	Decrease	BALF	PBMC and BALF	Beijing Institute of Genomics (BIG) Data Center (accession number: CRA002390), originally published by Xiong Y et al., 2021	Re-analysis of RNA sequencing data published by Xiong Y et al., 2021		Major findings were (i) more than half of the interactions between lncRNAs‐PCGs of BALF samples established by trans‐acting lncRNA HOTAIRM1 (decreased in BALF), PVT1 (increased in BALF and novel transcript AL392172.1 (not observed in current version Ensembl or NCBI, increased), (ii) binding of several deregulated lncRNAs have been shown to bind with SARS-CoV-2 genome by computational tool; the 5′…	Moazzam-Jazi M et al., 2021							LINC01163	Decrease (severe vs nonsevere)	Cheng J et al., 2021		LINC01163						MEG3	Increased	Laha S et al., 2021
SNHG32	Decrease	BALF	PBMC and BALF	Beijing Institute of Genomics (BIG) Data Center (accession number: CRA002390), originally published by Xiong Y et al., 2021	Re-analysis of RNA sequencing data published by Xiong Y et al., 2021		Major findings were (i) more than half of the interactions between lncRNAs‐PCGs of BALF samples established by trans‐acting lncRNA HOTAIRM1 (decreased in BALF), PVT1 (increased in BALF and novel transcript AL392172.1 (not observed in current version Ensembl or NCBI, increased), (ii) binding of several deregulated lncRNAs have been shown to bind with SARS-CoV-2 genome by computational tool; the 5′…	Moazzam-Jazi M et al., 2021							LINC01168	Decrease	Moazzam-Jazi M et al., 2021		LINC01168						NEAT1	Increase	Devadoss D et al., 2021 (pre-print)
SNHG7	Decrease	BALF	PBMC and BALF	Beijing Institute of Genomics (BIG) Data Center (accession number: CRA002390), originally published by Xiong Y et al., 2021	Re-analysis of RNA sequencing data published by Xiong Y et al., 2021		Major findings were (i) more than half of the interactions between lncRNAs‐PCGs of BALF samples established by trans‐acting lncRNA HOTAIRM1 (decreased in BALF), PVT1 (increased in BALF and novel transcript AL392172.1 (not observed in current version Ensembl or NCBI, increased), (ii) binding of several deregulated lncRNAs have been shown to bind with SARS-CoV-2 genome by computational tool; the 5′…	Moazzam-Jazi M et al., 2021							LINC01215	Decrease (severe vs nonsevere)	Cheng J et al., 2021		LINC01215						NEAT1	Increase	Moazzam-Jazi M et al., 2021
TMEM147-AS1	Decrease	BALF	PBMC and BALF	Beijing Institute of Genomics (BIG) Data Center (accession number: CRA002390), originally published by Xiong Y et al., 2021	Re-analysis of RNA sequencing data published by Xiong Y et al., 2021		Major findings were (i) more than half of the interactions between lncRNAs‐PCGs of BALF samples established by trans‐acting lncRNA HOTAIRM1 (decreased in BALF), PVT1 (increased in BALF and novel transcript AL392172.1 (not observed in current version Ensembl or NCBI, increased), (ii) binding of several deregulated lncRNAs have been shown to bind with SARS-CoV-2 genome by computational tool; the 5′…	Moazzam-Jazi M et al., 2021							LINC01227	Decrease (severe vs nonsevere)	Cheng J et al., 2021		LINC01227						NEAT1	Increased	Laha S et al., 2021
TNRC6C-AS1	Decrease	BALF	PBMC and BALF	Beijing Institute of Genomics (BIG) Data Center (accession number: CRA002390), originally published by Xiong Y et al., 2021	Re-analysis of RNA sequencing data published by Xiong Y et al., 2021		Major findings were (i) more than half of the interactions between lncRNAs‐PCGs of BALF samples established by trans‐acting lncRNA HOTAIRM1 (decreased in BALF), PVT1 (increased in BALF and novel transcript AL392172.1 (not observed in current version Ensembl or NCBI, increased), (ii) binding of several deregulated lncRNAs have been shown to bind with SARS-CoV-2 genome by computational tool; the 5′…	Moazzam-Jazi M et al., 2021							LINC01237	Decrease (severe vs nonsevere)	Cheng J et al., 2021		LINC01237						PDC-AS1/ENSG00000229739.4	Increase (A549 cells)	Mukherjee S et al., 2021
ACAP2-IT1	Increase	BALF	PBMC and BALF	Beijing Institute of Genomics (BIG) Data Center (accession number: CRA002390), originally published by Xiong Y et al., 2021	Re-analysis of RNA sequencing data published by Xiong Y et al., 2021		Major findings were (i) more than half of the interactions between lncRNAs‐PCGs of BALF samples established by trans‐acting lncRNA HOTAIRM1 (decreased in BALF), PVT1 (increased in BALF and novel transcript AL392172.1 (not observed in current version Ensembl or NCBI, increased), (ii) binding of several deregulated lncRNAs have been shown to bind with SARS-CoV-2 genome by computational tool; the 5′…	Moazzam-Jazi M et al., 2021							LINC01238	Decrease (severe vs nonsevere)	Cheng J et al., 2021		LINC01238						PDC-AS1/ENSG00000229739.4	Increase (Calu cells)	Mukherjee S et al., 2021
ANKRD44-AS1	Increase	BALF	PBMC and BALF	Beijing Institute of Genomics (BIG) Data Center (accession number: CRA002390), originally published by Xiong Y et al., 2021	Re-analysis of RNA sequencing data published by Xiong Y et al., 2021		Major findings were (i) more than half of the interactions between lncRNAs‐PCGs of BALF samples established by trans‐acting lncRNA HOTAIRM1 (decreased in BALF), PVT1 (increased in BALF and novel transcript AL392172.1 (not observed in current version Ensembl or NCBI, increased), (ii) binding of several deregulated lncRNAs have been shown to bind with SARS-CoV-2 genome by computational tool; the 5′…	Moazzam-Jazi M et al., 2021							LINC01252	Decrease (severe vs nonsevere)	Cheng J et al., 2021		LINC01252						RNF213-AS1	Increase	Moazzam-Jazi M et al., 2021
APTR	Increase	BALF	PBMC and BALF	Beijing Institute of Genomics (BIG) Data Center (accession number: CRA002390), originally published by Xiong Y et al., 2021	Re-analysis of RNA sequencing data published by Xiong Y et al., 2021		Major findings were (i) more than half of the interactions between lncRNAs‐PCGs of BALF samples established by trans‐acting lncRNA HOTAIRM1 (decreased in BALF), PVT1 (increased in BALF and novel transcript AL392172.1 (not observed in current version Ensembl or NCBI, increased), (ii) binding of several deregulated lncRNAs have been shown to bind with SARS-CoV-2 genome by computational tool; the 5′…	Moazzam-Jazi M et al., 2021							LINC01259	Decrease (severe vs nonsevere)	Cheng J et al., 2021		LINC01259						RNF213-AS1/ENSG00000263069.6	Increase (A549 cells)	Mukherjee S et al., 2021
CCR5AS	Increase	BALF	PBMC and BALF	Beijing Institute of Genomics (BIG) Data Center (accession number: CRA002390), originally published by Xiong Y et al., 2021	Re-analysis of RNA sequencing data published by Xiong Y et al., 2021		Major findings were (i) more than half of the interactions between lncRNAs‐PCGs of BALF samples established by trans‐acting lncRNA HOTAIRM1 (decreased in BALF), PVT1 (increased in BALF and novel transcript AL392172.1 (not observed in current version Ensembl or NCBI, increased), (ii) binding of several deregulated lncRNAs have been shown to bind with SARS-CoV-2 genome by computational tool; the 5′…	Moazzam-Jazi M et al., 2021							LINC01303	Decrease	Moazzam-Jazi M et al., 2021		LINC01303						RNF213-AS1/ENSG00000263069.6	Increase (Calu cells)	Mukherjee S et al., 2021
CDKN2B-AS1	Increase	BALF	PBMC and BALF	Beijing Institute of Genomics (BIG) Data Center (accession number: CRA002390), originally published by Xiong Y et al., 2021	Re-analysis of RNA sequencing data published by Xiong Y et al., 2021		Major findings were (i) more than half of the interactions between lncRNAs‐PCGs of BALF samples established by trans‐acting lncRNA HOTAIRM1 (decreased in BALF), PVT1 (increased in BALF and novel transcript AL392172.1 (not observed in current version Ensembl or NCBI, increased), (ii) binding of several deregulated lncRNAs have been shown to bind with SARS-CoV-2 genome by computational tool; the 5′…	Moazzam-Jazi M et al., 2021							LINC01395	Decrease (severe vs nonsevere)	Cheng J et al., 2021		LINC01395						WAKMAR2	Increase	Moazzam-Jazi M et al., 2021
COLCA1	Increase	BALF	PBMC and BALF	Beijing Institute of Genomics (BIG) Data Center (accession number: CRA002390), originally published by Xiong Y et al., 2021	Re-analysis of RNA sequencing data published by Xiong Y et al., 2021		Major findings were (i) more than half of the interactions between lncRNAs‐PCGs of BALF samples established by trans‐acting lncRNA HOTAIRM1 (decreased in BALF), PVT1 (increased in BALF and novel transcript AL392172.1 (not observed in current version Ensembl or NCBI, increased), (ii) binding of several deregulated lncRNAs have been shown to bind with SARS-CoV-2 genome by computational tool; the 5′…	Moazzam-Jazi M et al., 2021							LINC01402	Decrease (severe vs nonsevere)	Cheng J et al., 2021		LINC01402						WAKMAR2/ENSG00000237499.7	Increase (A549 cells)	Mukherjee S et al., 2021
COX10-AS1	Increase	BALF	PBMC and BALF	Beijing Institute of Genomics (BIG) Data Center (accession number: CRA002390), originally published by Xiong Y et al., 2021	Re-analysis of RNA sequencing data published by Xiong Y et al., 2021		Major findings were (i) more than half of the interactions between lncRNAs‐PCGs of BALF samples established by trans‐acting lncRNA HOTAIRM1 (decreased in BALF), PVT1 (increased in BALF and novel transcript AL392172.1 (not observed in current version Ensembl or NCBI, increased), (ii) binding of several deregulated lncRNAs have been shown to bind with SARS-CoV-2 genome by computational tool; the 5′…	Moazzam-Jazi M et al., 2021							LINC01409	Decrease (severe vs nonsevere)	Cheng J et al., 2021		LINC01409						WAKMAR2/ENSG00000237499.7	Increase (Calu cells)	Mukherjee S et al., 2021
CRNDE	Increase	BALF	PBMC and BALF	Beijing Institute of Genomics (BIG) Data Center (accession number: CRA002390), originally published by Xiong Y et al., 2021	Re-analysis of RNA sequencing data published by Xiong Y et al., 2021		Major findings were (i) more than half of the interactions between lncRNAs‐PCGs of BALF samples established by trans‐acting lncRNA HOTAIRM1 (decreased in BALF), PVT1 (increased in BALF and novel transcript AL392172.1 (not observed in current version Ensembl or NCBI, increased), (ii) binding of several deregulated lncRNAs have been shown to bind with SARS-CoV-2 genome by computational tool; the 5′…	Moazzam-Jazi M et al., 2021							LINC01431	Decrease (severe vs nonsevere)	Cheng J et al., 2021		LINC01431						WDFY3-AS2	Increase	Moazzam-Jazi M et al., 2021
CYTOR	Increase	BALF	PBMC and BALF	Beijing Institute of Genomics (BIG) Data Center (accession number: CRA002390), originally published by Xiong Y et al., 2021	Re-analysis of RNA sequencing data published by Xiong Y et al., 2021		Major findings were (i) more than half of the interactions between lncRNAs‐PCGs of BALF samples established by trans‐acting lncRNA HOTAIRM1 (decreased in BALF), PVT1 (increased in BALF and novel transcript AL392172.1 (not observed in current version Ensembl or NCBI, increased), (ii) binding of several deregulated lncRNAs have been shown to bind with SARS-CoV-2 genome by computational tool; the 5′…	Moazzam-Jazi M et al., 2021							LINC01473	Decrease (severe vs nonsevere)	Cheng J et al., 2021		LINC01473						WDFY3-AS2	Increase (severe vs non severe)	Cheng J et al., 2021
DANCR	Increase	BALF	PBMC and BALF	Beijing Institute of Genomics (BIG) Data Center (accession number: CRA002390), originally published by Xiong Y et al., 2021	Re-analysis of RNA sequencing data published by Xiong Y et al., 2021		Major findings were (i) more than half of the interactions between lncRNAs‐PCGs of BALF samples established by trans‐acting lncRNA HOTAIRM1 (decreased in BALF), PVT1 (increased in BALF and novel transcript AL392172.1 (not observed in current version Ensembl or NCBI, increased), (ii) binding of several deregulated lncRNAs have been shown to bind with SARS-CoV-2 genome by computational tool; the 5′…	Moazzam-Jazi M et al., 2021							LINC01503	Decrease	Moazzam-Jazi M et al., 2021		LINC01503
DLEU1	Increase	BALF	PBMC and BALF	Beijing Institute of Genomics (BIG) Data Center (accession number: CRA002390), originally published by Xiong Y et al., 2021	Re-analysis of RNA sequencing data published by Xiong Y et al., 2021		Major findings were (i) more than half of the interactions between lncRNAs‐PCGs of BALF samples established by trans‐acting lncRNA HOTAIRM1 (decreased in BALF), PVT1 (increased in BALF and novel transcript AL392172.1 (not observed in current version Ensembl or NCBI, increased), (ii) binding of several deregulated lncRNAs have been shown to bind with SARS-CoV-2 genome by computational tool; the 5′…	Moazzam-Jazi M et al., 2021							LINC01505	Decrease (severe vs nonsevere)	Cheng J et al., 2021		LINC01505
DLEU2	Increase	BALF	PBMC and BALF	Beijing Institute of Genomics (BIG) Data Center (accession number: CRA002390), originally published by Xiong Y et al., 2021	Re-analysis of RNA sequencing data published by Xiong Y et al., 2021		Major findings were (i) more than half of the interactions between lncRNAs‐PCGs of BALF samples established by trans‐acting lncRNA HOTAIRM1 (decreased in BALF), PVT1 (increased in BALF and novel transcript AL392172.1 (not observed in current version Ensembl or NCBI, increased), (ii) binding of several deregulated lncRNAs have been shown to bind with SARS-CoV-2 genome by computational tool; the 5′…	Moazzam-Jazi M et al., 2021							LINC01534	Decrease (severe vs nonsevere)	Cheng J et al., 2021		LINC01534
DLGAP1-AS1	Increase	BALF	PBMC and BALF	Beijing Institute of Genomics (BIG) Data Center (accession number: CRA002390), originally published by Xiong Y et al., 2021	Re-analysis of RNA sequencing data published by Xiong Y et al., 2021		Major findings were (i) more than half of the interactions between lncRNAs‐PCGs of BALF samples established by trans‐acting lncRNA HOTAIRM1 (decreased in BALF), PVT1 (increased in BALF and novel transcript AL392172.1 (not observed in current version Ensembl or NCBI, increased), (ii) binding of several deregulated lncRNAs have been shown to bind with SARS-CoV-2 genome by computational tool; the 5′…	Moazzam-Jazi M et al., 2021							LINC01550	Decrease (severe vs nonsevere)	Cheng J et al., 2021		LINC01550
EIF3J-DT	Increase	BALF	PBMC and BALF	Beijing Institute of Genomics (BIG) Data Center (accession number: CRA002390), originally published by Xiong Y et al., 2021	Re-analysis of RNA sequencing data published by Xiong Y et al., 2021		Major findings were (i) more than half of the interactions between lncRNAs‐PCGs of BALF samples established by trans‐acting lncRNA HOTAIRM1 (decreased in BALF), PVT1 (increased in BALF and novel transcript AL392172.1 (not observed in current version Ensembl or NCBI, increased), (ii) binding of several deregulated lncRNAs have been shown to bind with SARS-CoV-2 genome by computational tool; the 5′…	Moazzam-Jazi M et al., 2021							LINC01569	Decrease (severe vs nonsevere)	Cheng J et al., 2021		LINC01569
EPB41L4A-AS1	Increase	BALF	PBMC and BALF	Beijing Institute of Genomics (BIG) Data Center (accession number: CRA002390), originally published by Xiong Y et al., 2021	Re-analysis of RNA sequencing data published by Xiong Y et al., 2021		Major findings were (i) more than half of the interactions between lncRNAs‐PCGs of BALF samples established by trans‐acting lncRNA HOTAIRM1 (decreased in BALF), PVT1 (increased in BALF and novel transcript AL392172.1 (not observed in current version Ensembl or NCBI, increased), (ii) binding of several deregulated lncRNAs have been shown to bind with SARS-CoV-2 genome by computational tool; the 5′…	Moazzam-Jazi M et al., 2021							LINC01572	Decrease (severe vs nonsevere)	Cheng J et al., 2021		LINC01572
GAS5	Increase	BALF	PBMC and BALF	Beijing Institute of Genomics (BIG) Data Center (accession number: CRA002390), originally published by Xiong Y et al., 2021	Re-analysis of RNA sequencing data published by Xiong Y et al., 2021		Major findings were (i) more than half of the interactions between lncRNAs‐PCGs of BALF samples established by trans‐acting lncRNA HOTAIRM1 (decreased in BALF), PVT1 (increased in BALF and novel transcript AL392172.1 (not observed in current version Ensembl or NCBI, increased), (ii) binding of several deregulated lncRNAs have been shown to bind with SARS-CoV-2 genome by computational tool; the 5′…	Moazzam-Jazi M et al., 2021							LINC01578	Decrease (severe vs nonsevere)	Cheng J et al., 2021		LINC01578
GMDS-DT	Increase	BALF	PBMC and BALF	Beijing Institute of Genomics (BIG) Data Center (accession number: CRA002390), originally published by Xiong Y et al., 2021	Re-analysis of RNA sequencing data published by Xiong Y et al., 2021		Major findings were (i) more than half of the interactions between lncRNAs‐PCGs of BALF samples established by trans‐acting lncRNA HOTAIRM1 (decreased in BALF), PVT1 (increased in BALF and novel transcript AL392172.1 (not observed in current version Ensembl or NCBI, increased), (ii) binding of several deregulated lncRNAs have been shown to bind with SARS-CoV-2 genome by computational tool; the 5′…	Moazzam-Jazi M et al., 2021							LINC01588	Decrease (severe vs nonsevere)	Cheng J et al., 2021		LINC01588
H19	Increase	BALF	PBMC and BALF	Beijing Institute of Genomics (BIG) Data Center (accession number: CRA002390), originally published by Xiong Y et al., 2021	Re-analysis of RNA sequencing data published by Xiong Y et al., 2021		Major findings were (i) more than half of the interactions between lncRNAs‐PCGs of BALF samples established by trans‐acting lncRNA HOTAIRM1 (decreased in BALF), PVT1 (increased in BALF and novel transcript AL392172.1 (not observed in current version Ensembl or NCBI, increased), (ii) binding of several deregulated lncRNAs have been shown to bind with SARS-CoV-2 genome by computational tool; the 5′…	Moazzam-Jazi M et al., 2021							LINC01619	Decrease (severe vs nonsevere)	Cheng J et al., 2021		LINC01619
HEIH	Increase	BALF	PBMC and BALF	Beijing Institute of Genomics (BIG) Data Center (accession number: CRA002390), originally published by Xiong Y et al., 2021	Re-analysis of RNA sequencing data published by Xiong Y et al., 2021		Major findings were (i) more than half of the interactions between lncRNAs‐PCGs of BALF samples established by trans‐acting lncRNA HOTAIRM1 (decreased in BALF), PVT1 (increased in BALF and novel transcript AL392172.1 (not observed in current version Ensembl or NCBI, increased), (ii) binding of several deregulated lncRNAs have been shown to bind with SARS-CoV-2 genome by computational tool; the 5′…	Moazzam-Jazi M et al., 2021							LINC01624	Decrease (severe vs nonsevere)	Cheng J et al., 2021		LINC01624
IL10RB-DT	Increase	BALF	PBMC and BALF	Beijing Institute of Genomics (BIG) Data Center (accession number: CRA002390), originally published by Xiong Y et al., 2021	Re-analysis of RNA sequencing data published by Xiong Y et al., 2021		Major findings were (i) more than half of the interactions between lncRNAs‐PCGs of BALF samples established by trans‐acting lncRNA HOTAIRM1 (decreased in BALF), PVT1 (increased in BALF and novel transcript AL392172.1 (not observed in current version Ensembl or NCBI, increased), (ii) binding of several deregulated lncRNAs have been shown to bind with SARS-CoV-2 genome by computational tool; the 5′…	Moazzam-Jazi M et al., 2021							LINC01637	Decrease (severe vs nonsevere)	Cheng J et al., 2021		LINC01637
KCNQ1OT1	Increase	BALF	PBMC and BALF	Beijing Institute of Genomics (BIG) Data Center (accession number: CRA002390), originally published by Xiong Y et al., 2021	Re-analysis of RNA sequencing data published by Xiong Y et al., 2021		Major findings were (i) more than half of the interactions between lncRNAs‐PCGs of BALF samples established by trans‐acting lncRNA HOTAIRM1 (decreased in BALF), PVT1 (increased in BALF and novel transcript AL392172.1 (not observed in current version Ensembl or NCBI, increased), (ii) binding of several deregulated lncRNAs have been shown to bind with SARS-CoV-2 genome by computational tool; the 5′…	Moazzam-Jazi M et al., 2021							LINC01644	Decrease (severe vs nonsevere)	Cheng J et al., 2021		LINC01644
KLHL6-AS1	Increase	BALF	PBMC and BALF	Beijing Institute of Genomics (BIG) Data Center (accession number: CRA002390), originally published by Xiong Y et al., 2021	Re-analysis of RNA sequencing data published by Xiong Y et al., 2021		Major findings were (i) more than half of the interactions between lncRNAs‐PCGs of BALF samples established by trans‐acting lncRNA HOTAIRM1 (decreased in BALF), PVT1 (increased in BALF and novel transcript AL392172.1 (not observed in current version Ensembl or NCBI, increased), (ii) binding of several deregulated lncRNAs have been shown to bind with SARS-CoV-2 genome by computational tool; the 5′…	Moazzam-Jazi M et al., 2021							LINC01678	Decrease (severe vs nonsevere)	Cheng J et al., 2021		LINC01678
LINC00265	Increase	BALF	PBMC and BALF	Beijing Institute of Genomics (BIG) Data Center (accession number: CRA002390), originally published by Xiong Y et al., 2021	Re-analysis of RNA sequencing data published by Xiong Y et al., 2021		Major findings were (i) more than half of the interactions between lncRNAs‐PCGs of BALF samples established by trans‐acting lncRNA HOTAIRM1 (decreased in BALF), PVT1 (increased in BALF and novel transcript AL392172.1 (not observed in current version Ensembl or NCBI, increased), (ii) binding of several deregulated lncRNAs have been shown to bind with SARS-CoV-2 genome by computational tool; the 5′…	Moazzam-Jazi M et al., 2021							LINC01684	Decrease (severe vs nonsevere)	Cheng J et al., 2021		LINC01684
LINC00342	Increase	BALF	PBMC and BALF	Beijing Institute of Genomics (BIG) Data Center (accession number: CRA002390), originally published by Xiong Y et al., 2021	Re-analysis of RNA sequencing data published by Xiong Y et al., 2021		Major findings were (i) more than half of the interactions between lncRNAs‐PCGs of BALF samples established by trans‐acting lncRNA HOTAIRM1 (decreased in BALF), PVT1 (increased in BALF and novel transcript AL392172.1 (not observed in current version Ensembl or NCBI, increased), (ii) binding of several deregulated lncRNAs have been shown to bind with SARS-CoV-2 genome by computational tool; the 5′…	Moazzam-Jazi M et al., 2021							LINC01703	Decrease (severe vs nonsevere)	Cheng J et al., 2021		LINC01703
LINC00504	Increase	BALF	PBMC and BALF	Beijing Institute of Genomics (BIG) Data Center (accession number: CRA002390), originally published by Xiong Y et al., 2021	Re-analysis of RNA sequencing data published by Xiong Y et al., 2021		Major findings were (i) more than half of the interactions between lncRNAs‐PCGs of BALF samples established by trans‐acting lncRNA HOTAIRM1 (decreased in BALF), PVT1 (increased in BALF and novel transcript AL392172.1 (not observed in current version Ensembl or NCBI, increased), (ii) binding of several deregulated lncRNAs have been shown to bind with SARS-CoV-2 genome by computational tool; the 5′…	Moazzam-Jazi M et al., 2021							LINC01715	Decrease (severe vs nonsevere)	Cheng J et al., 2021		LINC01715
LINC00630	Increase	BALF	PBMC and BALF	Beijing Institute of Genomics (BIG) Data Center (accession number: CRA002390), originally published by Xiong Y et al., 2021	Re-analysis of RNA sequencing data published by Xiong Y et al., 2021		Major findings were (i) more than half of the interactions between lncRNAs‐PCGs of BALF samples established by trans‐acting lncRNA HOTAIRM1 (decreased in BALF), PVT1 (increased in BALF and novel transcript AL392172.1 (not observed in current version Ensembl or NCBI, increased), (ii) binding of several deregulated lncRNAs have been shown to bind with SARS-CoV-2 genome by computational tool; the 5′…	Moazzam-Jazi M et al., 2021							LINC01727	Decrease (severe vs nonsevere)	Cheng J et al., 2021		LINC01727
LINC00632	Increase	BALF	PBMC and BALF	Beijing Institute of Genomics (BIG) Data Center (accession number: CRA002390), originally published by Xiong Y et al., 2021	Re-analysis of RNA sequencing data published by Xiong Y et al., 2021		Major findings were (i) more than half of the interactions between lncRNAs‐PCGs of BALF samples established by trans‐acting lncRNA HOTAIRM1 (decreased in BALF), PVT1 (increased in BALF and novel transcript AL392172.1 (not observed in current version Ensembl or NCBI, increased), (ii) binding of several deregulated lncRNAs have been shown to bind with SARS-CoV-2 genome by computational tool; the 5′…	Moazzam-Jazi M et al., 2021							LINC01730	Decrease (severe vs nonsevere)	Cheng J et al., 2021		LINC01730
LINC01003	Increase	BALF	PBMC and BALF	Beijing Institute of Genomics (BIG) Data Center (accession number: CRA002390), originally published by Xiong Y et al., 2021	Re-analysis of RNA sequencing data published by Xiong Y et al., 2021		Major findings were (i) more than half of the interactions between lncRNAs‐PCGs of BALF samples established by trans‐acting lncRNA HOTAIRM1 (decreased in BALF), PVT1 (increased in BALF and novel transcript AL392172.1 (not observed in current version Ensembl or NCBI, increased), (ii) binding of several deregulated lncRNAs have been shown to bind with SARS-CoV-2 genome by computational tool; the 5′…	Moazzam-Jazi M et al., 2021							LINC01732	Decrease (severe vs nonsevere)	Cheng J et al., 2021		LINC01732
LINC01133	Increase	BALF	PBMC and BALF	Beijing Institute of Genomics (BIG) Data Center (accession number: CRA002390), originally published by Xiong Y et al., 2021	Re-analysis of RNA sequencing data published by Xiong Y et al., 2021		Major findings were (i) more than half of the interactions between lncRNAs‐PCGs of BALF samples established by trans‐acting lncRNA HOTAIRM1 (decreased in BALF), PVT1 (increased in BALF and novel transcript AL392172.1 (not observed in current version Ensembl or NCBI, increased), (ii) binding of several deregulated lncRNAs have been shown to bind with SARS-CoV-2 genome by computational tool; the 5′…	Moazzam-Jazi M et al., 2021							LINC01772	Decrease (severe vs nonsevere)	Cheng J et al., 2021		LINC01772
LINC01146	Increase	BALF	PBMC and BALF	Beijing Institute of Genomics (BIG) Data Center (accession number: CRA002390), originally published by Xiong Y et al., 2021	Re-analysis of RNA sequencing data published by Xiong Y et al., 2021		Major findings were (i) more than half of the interactions between lncRNAs‐PCGs of BALF samples established by trans‐acting lncRNA HOTAIRM1 (decreased in BALF), PVT1 (increased in BALF and novel transcript AL392172.1 (not observed in current version Ensembl or NCBI, increased), (ii) binding of several deregulated lncRNAs have been shown to bind with SARS-CoV-2 genome by computational tool; the 5′…	Moazzam-Jazi M et al., 2021							LINC01786	Decrease (severe vs nonsevere)	Cheng J et al., 2021		LINC01786
LINC01176	Increase	BALF	PBMC and BALF	Beijing Institute of Genomics (BIG) Data Center (accession number: CRA002390), originally published by Xiong Y et al., 2021	Re-analysis of RNA sequencing data published by Xiong Y et al., 2021		Major findings were (i) more than half of the interactions between lncRNAs‐PCGs of BALF samples established by trans‐acting lncRNA HOTAIRM1 (decreased in BALF), PVT1 (increased in BALF and novel transcript AL392172.1 (not observed in current version Ensembl or NCBI, increased), (ii) binding of several deregulated lncRNAs have been shown to bind with SARS-CoV-2 genome by computational tool; the 5′…	Moazzam-Jazi M et al., 2021							LINC01801	Decrease (severe vs nonsevere)	Cheng J et al., 2021		LINC01801
LINC01184	Increase	BALF	PBMC and BALF	Beijing Institute of Genomics (BIG) Data Center (accession number: CRA002390), originally published by Xiong Y et al., 2021	Re-analysis of RNA sequencing data published by Xiong Y et al., 2021		Major findings were (i) more than half of the interactions between lncRNAs‐PCGs of BALF samples established by trans‐acting lncRNA HOTAIRM1 (decreased in BALF), PVT1 (increased in BALF and novel transcript AL392172.1 (not observed in current version Ensembl or NCBI, increased), (ii) binding of several deregulated lncRNAs have been shown to bind with SARS-CoV-2 genome by computational tool; the 5′…	Moazzam-Jazi M et al., 2021							LINC01806	Decrease (severe vs nonsevere)	Cheng J et al., 2021		LINC01806
LINC01232	Increase	BALF	PBMC and BALF	Beijing Institute of Genomics (BIG) Data Center (accession number: CRA002390), originally published by Xiong Y et al., 2021	Re-analysis of RNA sequencing data published by Xiong Y et al., 2021		Major findings were (i) more than half of the interactions between lncRNAs‐PCGs of BALF samples established by trans‐acting lncRNA HOTAIRM1 (decreased in BALF), PVT1 (increased in BALF and novel transcript AL392172.1 (not observed in current version Ensembl or NCBI, increased), (ii) binding of several deregulated lncRNAs have been shown to bind with SARS-CoV-2 genome by computational tool; the 5′…	Moazzam-Jazi M et al., 2021							LINC01857	Decrease (severe vs nonsevere)	Cheng J et al., 2021		LINC01857
LINC01278	Increase	BALF	PBMC and BALF	Beijing Institute of Genomics (BIG) Data Center (accession number: CRA002390), originally published by Xiong Y et al., 2021	Re-analysis of RNA sequencing data published by Xiong Y et al., 2021		Major findings were (i) more than half of the interactions between lncRNAs‐PCGs of BALF samples established by trans‐acting lncRNA HOTAIRM1 (decreased in BALF), PVT1 (increased in BALF and novel transcript AL392172.1 (not observed in current version Ensembl or NCBI, increased), (ii) binding of several deregulated lncRNAs have been shown to bind with SARS-CoV-2 genome by computational tool; the 5′…	Moazzam-Jazi M et al., 2021							LINC01876	Decrease (severe vs nonsevere)	Cheng J et al., 2021		LINC01876
LINC01504	Increase	BALF	PBMC and BALF	Beijing Institute of Genomics (BIG) Data Center (accession number: CRA002390), originally published by Xiong Y et al., 2021	Re-analysis of RNA sequencing data published by Xiong Y et al., 2021		Major findings were (i) more than half of the interactions between lncRNAs‐PCGs of BALF samples established by trans‐acting lncRNA HOTAIRM1 (decreased in BALF), PVT1 (increased in BALF and novel transcript AL392172.1 (not observed in current version Ensembl or NCBI, increased), (ii) binding of several deregulated lncRNAs have been shown to bind with SARS-CoV-2 genome by computational tool; the 5′…	Moazzam-Jazi M et al., 2021							LINC01891	Decrease (severe vs nonsevere)	Cheng J et al., 2021		LINC01891
LINC02185	Increase	BALF	PBMC and BALF	Beijing Institute of Genomics (BIG) Data Center (accession number: CRA002390), originally published by Xiong Y et al., 2021	Re-analysis of RNA sequencing data published by Xiong Y et al., 2021		Major findings were (i) more than half of the interactions between lncRNAs‐PCGs of BALF samples established by trans‐acting lncRNA HOTAIRM1 (decreased in BALF), PVT1 (increased in BALF and novel transcript AL392172.1 (not observed in current version Ensembl or NCBI, increased), (ii) binding of several deregulated lncRNAs have been shown to bind with SARS-CoV-2 genome by computational tool; the 5′…	Moazzam-Jazi M et al., 2021							LINC01948	Decrease	Moazzam-Jazi M et al., 2021		LINC01948
LINC02432	Increase	BALF	PBMC and BALF	Beijing Institute of Genomics (BIG) Data Center (accession number: CRA002390), originally published by Xiong Y et al., 2021	Re-analysis of RNA sequencing data published by Xiong Y et al., 2021		Major findings were (i) more than half of the interactions between lncRNAs‐PCGs of BALF samples established by trans‐acting lncRNA HOTAIRM1 (decreased in BALF), PVT1 (increased in BALF and novel transcript AL392172.1 (not observed in current version Ensembl or NCBI, increased), (ii) binding of several deregulated lncRNAs have been shown to bind with SARS-CoV-2 genome by computational tool; the 5′…	Moazzam-Jazi M et al., 2021							LINC01962	Decrease	Moazzam-Jazi M et al., 2021		LINC01962
LINC02541	Increase	BALF	PBMC and BALF	Beijing Institute of Genomics (BIG) Data Center (accession number: CRA002390), originally published by Xiong Y et al., 2021	Re-analysis of RNA sequencing data published by Xiong Y et al., 2021		Major findings were (i) more than half of the interactions between lncRNAs‐PCGs of BALF samples established by trans‐acting lncRNA HOTAIRM1 (decreased in BALF), PVT1 (increased in BALF and novel transcript AL392172.1 (not observed in current version Ensembl or NCBI, increased), (ii) binding of several deregulated lncRNAs have been shown to bind with SARS-CoV-2 genome by computational tool; the 5′…	Moazzam-Jazi M et al., 2021							LINC01973	Decrease (severe vs nonsevere)	Cheng J et al., 2021		LINC01973
LINC-PINT	Increase	BALF	PBMC and BALF	Beijing Institute of Genomics (BIG) Data Center (accession number: CRA002390), originally published by Xiong Y et al., 2021	Re-analysis of RNA sequencing data published by Xiong Y et al., 2021		Major findings were (i) more than half of the interactions between lncRNAs‐PCGs of BALF samples established by trans‐acting lncRNA HOTAIRM1 (decreased in BALF), PVT1 (increased in BALF and novel transcript AL392172.1 (not observed in current version Ensembl or NCBI, increased), (ii) binding of several deregulated lncRNAs have been shown to bind with SARS-CoV-2 genome by computational tool; the 5′…	Moazzam-Jazi M et al., 2021							LINC02012	Decrease (severe vs nonsevere)	Cheng J et al., 2021		LINC02012
MALAT1	Increase	BALF	PBMC and BALF	Beijing Institute of Genomics (BIG) Data Center (accession number: CRA002390), originally published by Xiong Y et al., 2021	Re-analysis of RNA sequencing data published by Xiong Y et al., 2021		Major findings were (i) more than half of the interactions between lncRNAs‐PCGs of BALF samples established by trans‐acting lncRNA HOTAIRM1 (decreased in BALF), PVT1 (increased in BALF and novel transcript AL392172.1 (not observed in current version Ensembl or NCBI, increased), (ii) binding of several deregulated lncRNAs have been shown to bind with SARS-CoV-2 genome by computational tool; the 5′…	Moazzam-Jazi M et al., 2021							LINC02018	Decrease (severe vs nonsevere)	Cheng J et al., 2021		LINC02018
MINCR	Increase	BALF	PBMC and BALF	Beijing Institute of Genomics (BIG) Data Center (accession number: CRA002390), originally published by Xiong Y et al., 2021	Re-analysis of RNA sequencing data published by Xiong Y et al., 2021		Major findings were (i) more than half of the interactions between lncRNAs‐PCGs of BALF samples established by trans‐acting lncRNA HOTAIRM1 (decreased in BALF), PVT1 (increased in BALF and novel transcript AL392172.1 (not observed in current version Ensembl or NCBI, increased), (ii) binding of several deregulated lncRNAs have been shown to bind with SARS-CoV-2 genome by computational tool; the 5′…	Moazzam-Jazi M et al., 2021							LINC02019	Decrease (severe vs nonsevere)	Cheng J et al., 2021		LINC02019
MIR4458HG	Increase	BALF	PBMC and BALF	Beijing Institute of Genomics (BIG) Data Center (accession number: CRA002390), originally published by Xiong Y et al., 2021	Re-analysis of RNA sequencing data published by Xiong Y et al., 2021		Major findings were (i) more than half of the interactions between lncRNAs‐PCGs of BALF samples established by trans‐acting lncRNA HOTAIRM1 (decreased in BALF), PVT1 (increased in BALF and novel transcript AL392172.1 (not observed in current version Ensembl or NCBI, increased), (ii) binding of several deregulated lncRNAs have been shown to bind with SARS-CoV-2 genome by computational tool; the 5′…	Moazzam-Jazi M et al., 2021							LINC02085	Decrease (severe vs nonsevere)	Cheng J et al., 2021		LINC02085
NEAT1	Increase	BALF	PBMC and BALF	Beijing Institute of Genomics (BIG) Data Center (accession number: CRA002390), originally published by Xiong Y et al., 2021	Re-analysis of RNA sequencing data published by Xiong Y et al., 2021		Major findings were (i) more than half of the interactions between lncRNAs‐PCGs of BALF samples established by trans‐acting lncRNA HOTAIRM1 (decreased in BALF), PVT1 (increased in BALF and novel transcript AL392172.1 (not observed in current version Ensembl or NCBI, increased), (ii) binding of several deregulated lncRNAs have been shown to bind with SARS-CoV-2 genome by computational tool; the 5′…	Moazzam-Jazi M et al., 2021							LINC02086	Decrease (severe vs nonsevere)	Cheng J et al., 2021		LINC02086
NORAD	Increase	BALF	PBMC and BALF	Beijing Institute of Genomics (BIG) Data Center (accession number: CRA002390), originally published by Xiong Y et al., 2021	Re-analysis of RNA sequencing data published by Xiong Y et al., 2021		Major findings were (i) more than half of the interactions between lncRNAs‐PCGs of BALF samples established by trans‐acting lncRNA HOTAIRM1 (decreased in BALF), PVT1 (increased in BALF and novel transcript AL392172.1 (not observed in current version Ensembl or NCBI, increased), (ii) binding of several deregulated lncRNAs have been shown to bind with SARS-CoV-2 genome by computational tool; the 5′…	Moazzam-Jazi M et al., 2021							LINC02100	Decrease (severe vs nonsevere)	Cheng J et al., 2021		LINC02100
OLMALINC	Increase	BALF	PBMC and BALF	Beijing Institute of Genomics (BIG) Data Center (accession number: CRA002390), originally published by Xiong Y et al., 2021	Re-analysis of RNA sequencing data published by Xiong Y et al., 2021		Major findings were (i) more than half of the interactions between lncRNAs‐PCGs of BALF samples established by trans‐acting lncRNA HOTAIRM1 (decreased in BALF), PVT1 (increased in BALF and novel transcript AL392172.1 (not observed in current version Ensembl or NCBI, increased), (ii) binding of several deregulated lncRNAs have been shown to bind with SARS-CoV-2 genome by computational tool; the 5′…	Moazzam-Jazi M et al., 2021							LINC02145	Decrease (severe vs nonsevere)	Cheng J et al., 2021		LINC02145
OTUD6B-AS1	Increase	BALF	PBMC and BALF	Beijing Institute of Genomics (BIG) Data Center (accession number: CRA002390), originally published by Xiong Y et al., 2021	Re-analysis of RNA sequencing data published by Xiong Y et al., 2021		Major findings were (i) more than half of the interactions between lncRNAs‐PCGs of BALF samples established by trans‐acting lncRNA HOTAIRM1 (decreased in BALF), PVT1 (increased in BALF and novel transcript AL392172.1 (not observed in current version Ensembl or NCBI, increased), (ii) binding of several deregulated lncRNAs have been shown to bind with SARS-CoV-2 genome by computational tool; the 5′…	Moazzam-Jazi M et al., 2021							LINC02154	Decrease	Moazzam-Jazi M et al., 2021		LINC02154
PAXIP1-AS2	Increase	BALF	PBMC and BALF	Beijing Institute of Genomics (BIG) Data Center (accession number: CRA002390), originally published by Xiong Y et al., 2021	Re-analysis of RNA sequencing data published by Xiong Y et al., 2021		Major findings were (i) more than half of the interactions between lncRNAs‐PCGs of BALF samples established by trans‐acting lncRNA HOTAIRM1 (decreased in BALF), PVT1 (increased in BALF and novel transcript AL392172.1 (not observed in current version Ensembl or NCBI, increased), (ii) binding of several deregulated lncRNAs have been shown to bind with SARS-CoV-2 genome by computational tool; the 5′…	Moazzam-Jazi M et al., 2021							LINC02175	Decrease (severe vs nonsevere)	Cheng J et al., 2021		LINC02175
PCBP1-AS1	Increase	BALF	PBMC and BALF	Beijing Institute of Genomics (BIG) Data Center (accession number: CRA002390), originally published by Xiong Y et al., 2021	Re-analysis of RNA sequencing data published by Xiong Y et al., 2021		Major findings were (i) more than half of the interactions between lncRNAs‐PCGs of BALF samples established by trans‐acting lncRNA HOTAIRM1 (decreased in BALF), PVT1 (increased in BALF and novel transcript AL392172.1 (not observed in current version Ensembl or NCBI, increased), (ii) binding of several deregulated lncRNAs have been shown to bind with SARS-CoV-2 genome by computational tool; the 5′…	Moazzam-Jazi M et al., 2021							LINC02205	Decrease (severe vs nonsevere)	Cheng J et al., 2021		LINC02205
PVT1	Increase	BALF	PBMC and BALF	Beijing Institute of Genomics (BIG) Data Center (accession number: CRA002390), originally published by Xiong Y et al., 2021	Re-analysis of RNA sequencing data published by Xiong Y et al., 2021		Major findings were (i) more than half of the interactions between lncRNAs‐PCGs of BALF samples established by trans‐acting lncRNA HOTAIRM1 (decreased in BALF), PVT1 (increased in BALF and novel transcript AL392172.1 (not observed in current version Ensembl or NCBI, increased), (ii) binding of several deregulated lncRNAs have been shown to bind with SARS-CoV-2 genome by computational tool; the 5′…	Moazzam-Jazi M et al., 2021							LINC02256	Decrease (severe vs nonsevere)	Cheng J et al., 2021		LINC02256
RNF213-AS1	Increase	BALF	PBMC and BALF	Beijing Institute of Genomics (BIG) Data Center (accession number: CRA002390), originally published by Xiong Y et al., 2021	Re-analysis of RNA sequencing data published by Xiong Y et al., 2021		Major findings were (i) more than half of the interactions between lncRNAs‐PCGs of BALF samples established by trans‐acting lncRNA HOTAIRM1 (decreased in BALF), PVT1 (increased in BALF and novel transcript AL392172.1 (not observed in current version Ensembl or NCBI, increased), (ii) binding of several deregulated lncRNAs have been shown to bind with SARS-CoV-2 genome by computational tool; the 5′…	Moazzam-Jazi M et al., 2021							LINC02257	Decrease (severe vs nonsevere)	Cheng J et al., 2021		LINC02257
SGMS1-AS1	Increase	BALF	PBMC and BALF	Beijing Institute of Genomics (BIG) Data Center (accession number: CRA002390), originally published by Xiong Y et al., 2021	Re-analysis of RNA sequencing data published by Xiong Y et al., 2021		Major findings were (i) more than half of the interactions between lncRNAs‐PCGs of BALF samples established by trans‐acting lncRNA HOTAIRM1 (decreased in BALF), PVT1 (increased in BALF and novel transcript AL392172.1 (not observed in current version Ensembl or NCBI, increased), (ii) binding of several deregulated lncRNAs have been shown to bind with SARS-CoV-2 genome by computational tool; the 5′…	Moazzam-Jazi M et al., 2021							LINC02273	Decrease (severe vs nonsevere)	Cheng J et al., 2021		LINC02273
SNHG14	Increase	BALF	PBMC and BALF	Beijing Institute of Genomics (BIG) Data Center (accession number: CRA002390), originally published by Xiong Y et al., 2021	Re-analysis of RNA sequencing data published by Xiong Y et al., 2021		Major findings were (i) more than half of the interactions between lncRNAs‐PCGs of BALF samples established by trans‐acting lncRNA HOTAIRM1 (decreased in BALF), PVT1 (increased in BALF and novel transcript AL392172.1 (not observed in current version Ensembl or NCBI, increased), (ii) binding of several deregulated lncRNAs have been shown to bind with SARS-CoV-2 genome by computational tool; the 5′…	Moazzam-Jazi M et al., 2021							LINC02287	Decrease (severe vs nonsevere)	Cheng J et al., 2021		LINC02287
SNHG16	Increase	BALF	PBMC and BALF	Beijing Institute of Genomics (BIG) Data Center (accession number: CRA002390), originally published by Xiong Y et al., 2021	Re-analysis of RNA sequencing data published by Xiong Y et al., 2021		Major findings were (i) more than half of the interactions between lncRNAs‐PCGs of BALF samples established by trans‐acting lncRNA HOTAIRM1 (decreased in BALF), PVT1 (increased in BALF and novel transcript AL392172.1 (not observed in current version Ensembl or NCBI, increased), (ii) binding of several deregulated lncRNAs have been shown to bind with SARS-CoV-2 genome by computational tool; the 5′…	Moazzam-Jazi M et al., 2021							LINC02295	Decrease (severe vs nonsevere)	Cheng J et al., 2021		LINC02295
SNHG20	Increase	BALF	PBMC and BALF	Beijing Institute of Genomics (BIG) Data Center (accession number: CRA002390), originally published by Xiong Y et al., 2021	Re-analysis of RNA sequencing data published by Xiong Y et al., 2021		Major findings were (i) more than half of the interactions between lncRNAs‐PCGs of BALF samples established by trans‐acting lncRNA HOTAIRM1 (decreased in BALF), PVT1 (increased in BALF and novel transcript AL392172.1 (not observed in current version Ensembl or NCBI, increased), (ii) binding of several deregulated lncRNAs have been shown to bind with SARS-CoV-2 genome by computational tool; the 5′…	Moazzam-Jazi M et al., 2021							LINC02298	Decrease (severe vs nonsevere)	Cheng J et al., 2021		LINC02298
SNHG30	Increase	BALF	PBMC and BALF	Beijing Institute of Genomics (BIG) Data Center (accession number: CRA002390), originally published by Xiong Y et al., 2021	Re-analysis of RNA sequencing data published by Xiong Y et al., 2021		Major findings were (i) more than half of the interactions between lncRNAs‐PCGs of BALF samples established by trans‐acting lncRNA HOTAIRM1 (decreased in BALF), PVT1 (increased in BALF and novel transcript AL392172.1 (not observed in current version Ensembl or NCBI, increased), (ii) binding of several deregulated lncRNAs have been shown to bind with SARS-CoV-2 genome by computational tool; the 5′…	Moazzam-Jazi M et al., 2021							LINC02325	Decrease (severe vs nonsevere)	Cheng J et al., 2021		LINC02325
SNHG6	Increase	BALF	PBMC and BALF	Beijing Institute of Genomics (BIG) Data Center (accession number: CRA002390), originally published by Xiong Y et al., 2021	Re-analysis of RNA sequencing data published by Xiong Y et al., 2021		Major findings were (i) more than half of the interactions between lncRNAs‐PCGs of BALF samples established by trans‐acting lncRNA HOTAIRM1 (decreased in BALF), PVT1 (increased in BALF and novel transcript AL392172.1 (not observed in current version Ensembl or NCBI, increased), (ii) binding of several deregulated lncRNAs have been shown to bind with SARS-CoV-2 genome by computational tool; the 5′…	Moazzam-Jazi M et al., 2021							LINC02328	Decrease (severe vs nonsevere)	Cheng J et al., 2021		LINC02328
SNHG8	Increase	BALF	PBMC and BALF	Beijing Institute of Genomics (BIG) Data Center (accession number: CRA002390), originally published by Xiong Y et al., 2021	Re-analysis of RNA sequencing data published by Xiong Y et al., 2021		Major findings were (i) more than half of the interactions between lncRNAs‐PCGs of BALF samples established by trans‐acting lncRNA HOTAIRM1 (decreased in BALF), PVT1 (increased in BALF and novel transcript AL392172.1 (not observed in current version Ensembl or NCBI, increased), (ii) binding of several deregulated lncRNAs have been shown to bind with SARS-CoV-2 genome by computational tool; the 5′…	Moazzam-Jazi M et al., 2021							LINC02361	Decrease (severe vs nonsevere)	Cheng J et al., 2021		LINC02361
SOX21-AS1	Increase	BALF	PBMC and BALF	Beijing Institute of Genomics (BIG) Data Center (accession number: CRA002390), originally published by Xiong Y et al., 2021	Re-analysis of RNA sequencing data published by Xiong Y et al., 2021		Major findings were (i) more than half of the interactions between lncRNAs‐PCGs of BALF samples established by trans‐acting lncRNA HOTAIRM1 (decreased in BALF), PVT1 (increased in BALF and novel transcript AL392172.1 (not observed in current version Ensembl or NCBI, increased), (ii) binding of several deregulated lncRNAs have been shown to bind with SARS-CoV-2 genome by computational tool; the 5′…	Moazzam-Jazi M et al., 2021							LINC02390	Decrease (severe vs nonsevere)	Cheng J et al., 2021		LINC02390
SPINT1-AS1	Increase	BALF	PBMC and BALF	Beijing Institute of Genomics (BIG) Data Center (accession number: CRA002390), originally published by Xiong Y et al., 2021	Re-analysis of RNA sequencing data published by Xiong Y et al., 2021		Major findings were (i) more than half of the interactions between lncRNAs‐PCGs of BALF samples established by trans‐acting lncRNA HOTAIRM1 (decreased in BALF), PVT1 (increased in BALF and novel transcript AL392172.1 (not observed in current version Ensembl or NCBI, increased), (ii) binding of several deregulated lncRNAs have been shown to bind with SARS-CoV-2 genome by computational tool; the 5′…	Moazzam-Jazi M et al., 2021							LINC02391	Decrease (severe vs nonsevere)	Cheng J et al., 2021		LINC02391
SRGAP3-AS2	Increase	BALF	PBMC and BALF	Beijing Institute of Genomics (BIG) Data Center (accession number: CRA002390), originally published by Xiong Y et al., 2021	Re-analysis of RNA sequencing data published by Xiong Y et al., 2021		Major findings were (i) more than half of the interactions between lncRNAs‐PCGs of BALF samples established by trans‐acting lncRNA HOTAIRM1 (decreased in BALF), PVT1 (increased in BALF and novel transcript AL392172.1 (not observed in current version Ensembl or NCBI, increased), (ii) binding of several deregulated lncRNAs have been shown to bind with SARS-CoV-2 genome by computational tool; the 5′…	Moazzam-Jazi M et al., 2021							LINC02397	Decrease (severe vs nonsevere)	Cheng J et al., 2021		LINC02397
SRP14-AS1	Increase	BALF	PBMC and BALF	Beijing Institute of Genomics (BIG) Data Center (accession number: CRA002390), originally published by Xiong Y et al., 2021	Re-analysis of RNA sequencing data published by Xiong Y et al., 2021		Major findings were (i) more than half of the interactions between lncRNAs‐PCGs of BALF samples established by trans‐acting lncRNA HOTAIRM1 (decreased in BALF), PVT1 (increased in BALF and novel transcript AL392172.1 (not observed in current version Ensembl or NCBI, increased), (ii) binding of several deregulated lncRNAs have been shown to bind with SARS-CoV-2 genome by computational tool; the 5′…	Moazzam-Jazi M et al., 2021							LINC02449	Decrease (severe vs nonsevere)	Cheng J et al., 2021		LINC02449
STARD13-AS	Increase	BALF	PBMC and BALF	Beijing Institute of Genomics (BIG) Data Center (accession number: CRA002390), originally published by Xiong Y et al., 2021	Re-analysis of RNA sequencing data published by Xiong Y et al., 2021		Major findings were (i) more than half of the interactions between lncRNAs‐PCGs of BALF samples established by trans‐acting lncRNA HOTAIRM1 (decreased in BALF), PVT1 (increased in BALF and novel transcript AL392172.1 (not observed in current version Ensembl or NCBI, increased), (ii) binding of several deregulated lncRNAs have been shown to bind with SARS-CoV-2 genome by computational tool; the 5′…	Moazzam-Jazi M et al., 2021							LINC02470	Decrease (severe vs nonsevere)	Cheng J et al., 2021		LINC02470
THAP9-AS1	Increase	BALF	PBMC and BALF	Beijing Institute of Genomics (BIG) Data Center (accession number: CRA002390), originally published by Xiong Y et al., 2021	Re-analysis of RNA sequencing data published by Xiong Y et al., 2021		Major findings were (i) more than half of the interactions between lncRNAs‐PCGs of BALF samples established by trans‐acting lncRNA HOTAIRM1 (decreased in BALF), PVT1 (increased in BALF and novel transcript AL392172.1 (not observed in current version Ensembl or NCBI, increased), (ii) binding of several deregulated lncRNAs have been shown to bind with SARS-CoV-2 genome by computational tool; the 5′…	Moazzam-Jazi M et al., 2021							LINC02481	Decrease (severe vs nonsevere)	Cheng J et al., 2021		LINC02481
TMEM44-AS1	Increase	BALF	PBMC and BALF	Beijing Institute of Genomics (BIG) Data Center (accession number: CRA002390), originally published by Xiong Y et al., 2021	Re-analysis of RNA sequencing data published by Xiong Y et al., 2021		Major findings were (i) more than half of the interactions between lncRNAs‐PCGs of BALF samples established by trans‐acting lncRNA HOTAIRM1 (decreased in BALF), PVT1 (increased in BALF and novel transcript AL392172.1 (not observed in current version Ensembl or NCBI, increased), (ii) binding of several deregulated lncRNAs have been shown to bind with SARS-CoV-2 genome by computational tool; the 5′…	Moazzam-Jazi M et al., 2021							LINC02551	Decrease (severe vs nonsevere)	Cheng J et al., 2021		LINC02551
TP53TG1	Increase	BALF	PBMC and BALF	Beijing Institute of Genomics (BIG) Data Center (accession number: CRA002390), originally published by Xiong Y et al., 2021	Re-analysis of RNA sequencing data published by Xiong Y et al., 2021		Major findings were (i) more than half of the interactions between lncRNAs‐PCGs of BALF samples established by trans‐acting lncRNA HOTAIRM1 (decreased in BALF), PVT1 (increased in BALF and novel transcript AL392172.1 (not observed in current version Ensembl or NCBI, increased), (ii) binding of several deregulated lncRNAs have been shown to bind with SARS-CoV-2 genome by computational tool; the 5′…	Moazzam-Jazi M et al., 2021							LINC02556	Decrease (severe vs nonsevere)	Cheng J et al., 2021		LINC02556
TRAM2-AS1	Increase	BALF	PBMC and BALF	Beijing Institute of Genomics (BIG) Data Center (accession number: CRA002390), originally published by Xiong Y et al., 2021	Re-analysis of RNA sequencing data published by Xiong Y et al., 2021		Major findings were (i) more than half of the interactions between lncRNAs‐PCGs of BALF samples established by trans‐acting lncRNA HOTAIRM1 (decreased in BALF), PVT1 (increased in BALF and novel transcript AL392172.1 (not observed in current version Ensembl or NCBI, increased), (ii) binding of several deregulated lncRNAs have been shown to bind with SARS-CoV-2 genome by computational tool; the 5′…	Moazzam-Jazi M et al., 2021							LINC02561	Decrease (severe vs nonsevere)	Cheng J et al., 2021		LINC02561
TRIM52-AS1	Increase	BALF	PBMC and BALF	Beijing Institute of Genomics (BIG) Data Center (accession number: CRA002390), originally published by Xiong Y et al., 2021	Re-analysis of RNA sequencing data published by Xiong Y et al., 2021		Major findings were (i) more than half of the interactions between lncRNAs‐PCGs of BALF samples established by trans‐acting lncRNA HOTAIRM1 (decreased in BALF), PVT1 (increased in BALF and novel transcript AL392172.1 (not observed in current version Ensembl or NCBI, increased), (ii) binding of several deregulated lncRNAs have been shown to bind with SARS-CoV-2 genome by computational tool; the 5′…	Moazzam-Jazi M et al., 2021							LINC02574	Decrease (severe vs nonsevere)	Cheng J et al., 2021		LINC02574
TUG1	Increase	BALF	PBMC and BALF	Beijing Institute of Genomics (BIG) Data Center (accession number: CRA002390), originally published by Xiong Y et al., 2021	Re-analysis of RNA sequencing data published by Xiong Y et al., 2021		Major findings were (i) more than half of the interactions between lncRNAs‐PCGs of BALF samples established by trans‐acting lncRNA HOTAIRM1 (decreased in BALF), PVT1 (increased in BALF and novel transcript AL392172.1 (not observed in current version Ensembl or NCBI, increased), (ii) binding of several deregulated lncRNAs have been shown to bind with SARS-CoV-2 genome by computational tool; the 5′…	Moazzam-Jazi M et al., 2021							LINC02577	Decrease	Moazzam-Jazi M et al., 2021		LINC02577
UBA6-AS1	Increase	BALF	PBMC and BALF	Beijing Institute of Genomics (BIG) Data Center (accession number: CRA002390), originally published by Xiong Y et al., 2021	Re-analysis of RNA sequencing data published by Xiong Y et al., 2021		Major findings were (i) more than half of the interactions between lncRNAs‐PCGs of BALF samples established by trans‐acting lncRNA HOTAIRM1 (decreased in BALF), PVT1 (increased in BALF and novel transcript AL392172.1 (not observed in current version Ensembl or NCBI, increased), (ii) binding of several deregulated lncRNAs have been shown to bind with SARS-CoV-2 genome by computational tool; the 5′…	Moazzam-Jazi M et al., 2021							LINC02580	Decrease (severe vs nonsevere)	Cheng J et al., 2021		LINC02580
WAKMAR2	Increase	BALF	PBMC and BALF	Beijing Institute of Genomics (BIG) Data Center (accession number: CRA002390), originally published by Xiong Y et al., 2021	Re-analysis of RNA sequencing data published by Xiong Y et al., 2021		Major findings were (i) more than half of the interactions between lncRNAs‐PCGs of BALF samples established by trans‐acting lncRNA HOTAIRM1 (decreased in BALF), PVT1 (increased in BALF and novel transcript AL392172.1 (not observed in current version Ensembl or NCBI, increased), (ii) binding of several deregulated lncRNAs have been shown to bind with SARS-CoV-2 genome by computational tool; the 5′…	Moazzam-Jazi M et al., 2021							LINC02591	Decrease (severe vs nonsevere)	Cheng J et al., 2021		LINC02591
WARS2-AS1	Increase	BALF	PBMC and BALF	Beijing Institute of Genomics (BIG) Data Center (accession number: CRA002390), originally published by Xiong Y et al., 2021	Re-analysis of RNA sequencing data published by Xiong Y et al., 2021		Major findings were (i) more than half of the interactions between lncRNAs‐PCGs of BALF samples established by trans‐acting lncRNA HOTAIRM1 (decreased in BALF), PVT1 (increased in BALF and novel transcript AL392172.1 (not observed in current version Ensembl or NCBI, increased), (ii) binding of several deregulated lncRNAs have been shown to bind with SARS-CoV-2 genome by computational tool; the 5′…	Moazzam-Jazi M et al., 2021							LINC02595	Decrease (severe vs nonsevere)	Cheng J et al., 2021		LINC02595
WDFY3-AS2	Increase	BALF	PBMC and BALF	Beijing Institute of Genomics (BIG) Data Center (accession number: CRA002390), originally published by Xiong Y et al., 2021	Re-analysis of RNA sequencing data published by Xiong Y et al., 2021		Major findings were (i) more than half of the interactions between lncRNAs‐PCGs of BALF samples established by trans‐acting lncRNA HOTAIRM1 (decreased in BALF), PVT1 (increased in BALF and novel transcript AL392172.1 (not observed in current version Ensembl or NCBI, increased), (ii) binding of several deregulated lncRNAs have been shown to bind with SARS-CoV-2 genome by computational tool; the 5′…	Moazzam-Jazi M et al., 2021							LINC02598	Decrease (severe vs nonsevere)	Cheng J et al., 2021		LINC02598
ZEB2-AS1	Increase	BALF	PBMC and BALF	Beijing Institute of Genomics (BIG) Data Center (accession number: CRA002390), originally published by Xiong Y et al., 2021	Re-analysis of RNA sequencing data published by Xiong Y et al., 2021		Major findings were (i) more than half of the interactions between lncRNAs‐PCGs of BALF samples established by trans‐acting lncRNA HOTAIRM1 (decreased in BALF), PVT1 (increased in BALF and novel transcript AL392172.1 (not observed in current version Ensembl or NCBI, increased), (ii) binding of several deregulated lncRNAs have been shown to bind with SARS-CoV-2 genome by computational tool; the 5′…	Moazzam-Jazi M et al., 2021							LINC02611	Decrease (severe vs nonsevere)	Cheng J et al., 2021		LINC02611
ZFAS1	Increase	BALF	PBMC and BALF	Beijing Institute of Genomics (BIG) Data Center (accession number: CRA002390), originally published by Xiong Y et al., 2021	Re-analysis of RNA sequencing data published by Xiong Y et al., 2021		Major findings were (i) more than half of the interactions between lncRNAs‐PCGs of BALF samples established by trans‐acting lncRNA HOTAIRM1 (decreased in BALF), PVT1 (increased in BALF and novel transcript AL392172.1 (not observed in current version Ensembl or NCBI, increased), (ii) binding of several deregulated lncRNAs have been shown to bind with SARS-CoV-2 genome by computational tool; the 5′…	Moazzam-Jazi M et al., 2021							LINC02614	Decrease (severe vs nonsevere)	Cheng J et al., 2021		LINC02614
ZNF667-AS1	Increase	BALF	PBMC and BALF	Beijing Institute of Genomics (BIG) Data Center (accession number: CRA002390), originally published by Xiong Y et al., 2021	Re-analysis of RNA sequencing data published by Xiong Y et al., 2021		Major findings were (i) more than half of the interactions between lncRNAs‐PCGs of BALF samples established by trans‐acting lncRNA HOTAIRM1 (decreased in BALF), PVT1 (increased in BALF and novel transcript AL392172.1 (not observed in current version Ensembl or NCBI, increased), (ii) binding of several deregulated lncRNAs have been shown to bind with SARS-CoV-2 genome by computational tool; the 5′…	Moazzam-Jazi M et al., 2021							LINC02615	Decrease (severe vs nonsevere)	Cheng J et al., 2021		LINC02615
ZSCAN16-AS1	Increase	BALF	PBMC and BALF	Beijing Institute of Genomics (BIG) Data Center (accession number: CRA002390), originally published by Xiong Y et al., 2021	Re-analysis of RNA sequencing data published by Xiong Y et al., 2021		Major findings were (i) more than half of the interactions between lncRNAs‐PCGs of BALF samples established by trans‐acting lncRNA HOTAIRM1 (decreased in BALF), PVT1 (increased in BALF and novel transcript AL392172.1 (not observed in current version Ensembl or NCBI, increased), (ii) binding of several deregulated lncRNAs have been shown to bind with SARS-CoV-2 genome by computational tool; the 5′…	Moazzam-Jazi M et al., 2021							LINC02648	Decrease (severe vs nonsevere)	Cheng J et al., 2021		LINC02648
LINC01127	Increase (COVID-ICU vs COVID NON-ICU )	ICU (n = 50), COVID-19 not admitted to ICU (n = 50), non-COVID-19 admitted to ICU (n = 16) and non-COVID-19 not admitted to ICU (n = 10),	PBMC	PRJNA660067	Re-analysis of RNA sequencing data published by Overmyer KA et al., 2020			Shaath H et al., 2021							LINC02666	Decrease (severe vs nonsevere)	Cheng J et al., 2021		LINC02666
LINC02207	Increase (COVID-ICU vs COVID NON-ICU )	ICU (n = 50), COVID-19 not admitted to ICU (n = 50), non-COVID-19 admitted to ICU (n = 16) and non-COVID-19 not admitted to ICU (n = 10),	PBMC	PRJNA660067	Re-analysis of RNA sequencing data published by Overmyer KA et al., 2020			Shaath H et al., 2021							LINC02694	Decrease (severe vs nonsevere)	Cheng J et al., 2021		LINC02694
LINC02289	Increase (COVID-ICU vs COVID NON-ICU )	ICU (n = 50), COVID-19 not admitted to ICU (n = 50), non-COVID-19 admitted to ICU (n = 16) and non-COVID-19 not admitted to ICU (n = 10),	PBMC	PRJNA660067	Re-analysis of RNA sequencing data published by Overmyer KA et al., 2020			Shaath H et al., 2021							LINC02731	Decrease (severe vs nonsevere)	Cheng J et al., 2021		LINC02731
AATBC	Decrease (COVID-ICU vs COVID NON-ICU )	ICU (n = 50), COVID-19 not admitted to ICU (n = 50), non-COVID-19 admitted to ICU (n = 16) and non-COVID-19 not admitted to ICU (n = 10),	PBMC	PRJNA660067	Re-analysis of RNA sequencing data published by Overmyer KA et al., 2020			Shaath H et al., 2021							LINC02754	Decrease (severe vs nonsevere)	Cheng J et al., 2021		LINC02754
ANKRD44-AS1	Decrease (COVID-ICU vs COVID NON-ICU )	ICU (n = 50), COVID-19 not admitted to ICU (n = 50), non-COVID-19 admitted to ICU (n = 16) and non-COVID-19 not admitted to ICU (n = 10),	PBMC	PRJNA660067	Re-analysis of RNA sequencing data published by Overmyer KA et al., 2020			Shaath H et al., 2021							LINC02766	Decrease (severe vs nonsevere)	Cheng J et al., 2021		LINC02766
CHRM3-AS2	Decrease (COVID-ICU vs COVID NON-ICU )	ICU (n = 50), COVID-19 not admitted to ICU (n = 50), non-COVID-19 admitted to ICU (n = 16) and non-COVID-19 not admitted to ICU (n = 10),	PBMC	PRJNA660067	Re-analysis of RNA sequencing data published by Overmyer KA et al., 2020			Shaath H et al., 2021							LINC02773	Decrease (severe vs nonsevere)	Cheng J et al., 2021		LINC02773
LINC00861	Decrease (COVID-ICU vs COVID NON-ICU )	ICU (n = 50), COVID-19 not admitted to ICU (n = 50), non-COVID-19 admitted to ICU (n = 16) and non-COVID-19 not admitted to ICU (n = 10),	PBMC	PRJNA660067	Re-analysis of RNA sequencing data published by Overmyer KA et al., 2020			Shaath H et al., 2021							LINC02776	Decrease (severe vs nonsevere)	Cheng J et al., 2021		LINC02776
LINC01871	Decrease (COVID-ICU vs COVID NON-ICU )	ICU (n = 50), COVID-19 not admitted to ICU (n = 50), non-COVID-19 admitted to ICU (n = 16) and non-COVID-19 not admitted to ICU (n = 10),	PBMC	PRJNA660067	Re-analysis of RNA sequencing data published by Overmyer KA et al., 2020			Shaath H et al., 2021							LINC02812	Decrease (severe vs nonsevere)	Cheng J et al., 2021		LINC02812
LINC02084	Decrease (COVID-ICU vs COVID NON-ICU )	ICU (n = 50), COVID-19 not admitted to ICU (n = 50), non-COVID-19 admitted to ICU (n = 16) and non-COVID-19 not admitted to ICU (n = 10),	PBMC	PRJNA660067	Re-analysis of RNA sequencing data published by Overmyer KA et al., 2020			Shaath H et al., 2021							LIX1-AS1	Decrease (severe vs nonsevere)	Cheng J et al., 2021		LIX1-AS1
LINC02446	Decrease (COVID-ICU vs COVID NON-ICU )	ICU (n = 50), COVID-19 not admitted to ICU (n = 50), non-COVID-19 admitted to ICU (n = 16) and non-COVID-19 not admitted to ICU (n = 10),	PBMC	PRJNA660067	Re-analysis of RNA sequencing data published by Overmyer KA et al., 2020			Shaath H et al., 2021							LY6E-DT	Decrease (severe vs nonsevere)	Cheng J et al., 2021		LY6E-DT
NRIR	Decrease (COVID-ICU vs COVID NON-ICU )	ICU (n = 50), COVID-19 not admitted to ICU (n = 50), non-COVID-19 admitted to ICU (n = 16) and non-COVID-19 not admitted to ICU (n = 10),	PBMC	PRJNA660067	Re-analysis of RNA sequencing data published by Overmyer KA et al., 2020			Shaath H et al., 2021							MAPKAPK5-AS1	Decrease (severe vs nonsevere)	Cheng J et al., 2021		MAPKAPK5-AS1
PRKCQ-AS1	Decrease (COVID-ICU vs COVID NON-ICU )	ICU (n = 50), COVID-19 not admitted to ICU (n = 50), non-COVID-19 admitted to ICU (n = 16) and non-COVID-19 not admitted to ICU (n = 10),	PBMC	PRJNA660067	Re-analysis of RNA sequencing data published by Overmyer KA et al., 2020			Shaath H et al., 2021							MDS2	Decrease (severe vs nonsevere)	Cheng J et al., 2021		MDS2
TRBV11-2	Decrease (COVID-ICU vs COVID NON-ICU )	ICU (n = 50), COVID-19 not admitted to ICU (n = 50), non-COVID-19 admitted to ICU (n = 16) and non-COVID-19 not admitted to ICU (n = 10),	PBMC	PRJNA660067	Re-analysis of RNA sequencing data published by Overmyer KA et al., 2020			Shaath H et al., 2021							MIATNB	Decrease (severe vs nonsevere)	Cheng J et al., 2021		MIATNB
TRG-AS1	Decrease (COVID-ICU vs COVID NON-ICU )	ICU (n = 50), COVID-19 not admitted to ICU (n = 50), non-COVID-19 admitted to ICU (n = 16) and non-COVID-19 not admitted to ICU (n = 10),	PBMC	PRJNA660067	Re-analysis of RNA sequencing data published by Overmyer KA et al., 2020			Shaath H et al., 2021							MIR155HG	Decrease (severe vs nonsevere)	Cheng J et al., 2021		MIR155HG
RGPD4-AS1	Increase (COVID-ICU vs Non-COVID-ICU)	ICU (n = 50), COVID-19 not admitted to ICU (n = 50), non-COVID-19 admitted to ICU (n = 16) and non-COVID-19 not admitted to ICU (n = 10),	PBMC	PRJNA660067	Re-analysis of RNA sequencing data published by Overmyer KA et al., 2020			Shaath H et al., 2021							MIR181A2HG	Decrease	Moazzam-Jazi M et al., 2021		MIR181A2HG
C5orf66	Increase (COVID-non ICU vs Non-COVID-non ICU)	ICU (n = 50), COVID-19 not admitted to ICU (n = 50), non-COVID-19 admitted to ICU (n = 16) and non-COVID-19 not admitted to ICU (n = 10),	PBMC	PRJNA660067	Re-analysis of RNA sequencing data published by Overmyer KA et al., 2020			Shaath H et al., 2021							MIR200CHG	Decrease (severe vs nonsevere)	Cheng J et al., 2021		MIR200CHG
DDIT4-AS1	Increase (COVID-non ICU vs Non-COVID-non ICU)	ICU (n = 50), COVID-19 not admitted to ICU (n = 50), non-COVID-19 admitted to ICU (n = 16) and non-COVID-19 not admitted to ICU (n = 10),	PBMC	PRJNA660067	Re-analysis of RNA sequencing data published by Overmyer KA et al., 2020			Shaath H et al., 2021							MIR222HG	Decrease (severe vs nonsevere)	Cheng J et al., 2021		MIR222HG
DTNB-AS1	Increase (COVID-non ICU vs Non-COVID-non ICU)	ICU (n = 50), COVID-19 not admitted to ICU (n = 50), non-COVID-19 admitted to ICU (n = 16) and non-COVID-19 not admitted to ICU (n = 10),	PBMC	PRJNA660067	Re-analysis of RNA sequencing data published by Overmyer KA et al., 2020			Shaath H et al., 2021							MIR22HG	Decrease (severe vs nonsevere)	Cheng J et al., 2021		MIR22HG
EBLN3P	Increase (COVID-non ICU vs Non-COVID-non ICU)	ICU (n = 50), COVID-19 not admitted to ICU (n = 50), non-COVID-19 admitted to ICU (n = 16) and non-COVID-19 not admitted to ICU (n = 10),	PBMC	PRJNA660067	Re-analysis of RNA sequencing data published by Overmyer KA et al., 2020			Shaath H et al., 2021							MIR4453HG	Decrease	Moazzam-Jazi M et al., 2021		MIR4453HG
FGD5-AS1	Increase (COVID-non ICU vs Non-COVID-non ICU)	ICU (n = 50), COVID-19 not admitted to ICU (n = 50), non-COVID-19 admitted to ICU (n = 16) and non-COVID-19 not admitted to ICU (n = 10),	PBMC	PRJNA660067	Re-analysis of RNA sequencing data published by Overmyer KA et al., 2020			Shaath H et al., 2021							MIR663AHG	Decrease (severe vs nonsevere)	Cheng J et al., 2021		MIR663AHG
GK-AS1	Increase (COVID-non ICU vs Non-COVID-non ICU)	ICU (n = 50), COVID-19 not admitted to ICU (n = 50), non-COVID-19 admitted to ICU (n = 16) and non-COVID-19 not admitted to ICU (n = 10),	PBMC	PRJNA660067	Re-analysis of RNA sequencing data published by Overmyer KA et al., 2020			Shaath H et al., 2021							MIR9-3HG	Decrease (severe vs nonsevere)	Cheng J et al., 2021		MIR9-3HG
HCG27	Increase (COVID-non ICU vs Non-COVID-non ICU)	ICU (n = 50), COVID-19 not admitted to ICU (n = 50), non-COVID-19 admitted to ICU (n = 16) and non-COVID-19 not admitted to ICU (n = 10),	PBMC	PRJNA660067	Re-analysis of RNA sequencing data published by Overmyer KA et al., 2020			Shaath H et al., 2021							MMP2-AS1	Decrease (severe vs nonsevere)	Cheng J et al., 2021		MMP2-AS1
HCG9	Increase (COVID-non ICU vs Non-COVID-non ICU)	ICU (n = 50), COVID-19 not admitted to ICU (n = 50), non-COVID-19 admitted to ICU (n = 16) and non-COVID-19 not admitted to ICU (n = 10),	PBMC	PRJNA660067	Re-analysis of RNA sequencing data published by Overmyer KA et al., 2020			Shaath H et al., 2021							MRPL20-AS1	Decrease	Moazzam-Jazi M et al., 2021		MRPL20-AS1
HCP5	Increase (COVID-non ICU vs Non-COVID-non ICU)	ICU (n = 50), COVID-19 not admitted to ICU (n = 50), non-COVID-19 admitted to ICU (n = 16) and non-COVID-19 not admitted to ICU (n = 10),	PBMC	PRJNA660067	Re-analysis of RNA sequencing data published by Overmyer KA et al., 2020			Shaath H et al., 2021							MUC20-OT1	Decrease (severe vs nonsevere)	Cheng J et al., 2021		MUC20-OT1
LINC00174	Increase (COVID-non ICU vs Non-COVID-non ICU)	ICU (n = 50), COVID-19 not admitted to ICU (n = 50), non-COVID-19 admitted to ICU (n = 16) and non-COVID-19 not admitted to ICU (n = 10),	PBMC	PRJNA660067	Re-analysis of RNA sequencing data published by Overmyer KA et al., 2020			Shaath H et al., 2021							MYADM-AS1	Decrease	Moazzam-Jazi M et al., 2021		MYADM-AS1
LINC01410	Increase (COVID-non ICU vs Non-COVID-non ICU)	ICU (n = 50), COVID-19 not admitted to ICU (n = 50), non-COVID-19 admitted to ICU (n = 16) and non-COVID-19 not admitted to ICU (n = 10),	PBMC	PRJNA660067	Re-analysis of RNA sequencing data published by Overmyer KA et al., 2020			Shaath H et al., 2021							MZF1-AS1	Decrease	Moazzam-Jazi M et al., 2021		MZF1-AS1
LINC02284	Increase (COVID-non ICU vs Non-COVID-non ICU)	ICU (n = 50), COVID-19 not admitted to ICU (n = 50), non-COVID-19 admitted to ICU (n = 16) and non-COVID-19 not admitted to ICU (n = 10),	PBMC	PRJNA660067	Re-analysis of RNA sequencing data published by Overmyer KA et al., 2020			Shaath H et al., 2021							N4BP2L2-IT2	Decrease	Moazzam-Jazi M et al., 2021		N4BP2L2-IT2
LINC02384	Increase (COVID-non ICU vs Non-COVID-non ICU)	ICU (n = 50), COVID-19 not admitted to ICU (n = 50), non-COVID-19 admitted to ICU (n = 16) and non-COVID-19 not admitted to ICU (n = 10),	PBMC	PRJNA660067	Re-analysis of RNA sequencing data published by Overmyer KA et al., 2020			Shaath H et al., 2021							NALCN-AS1	Decrease	Moazzam-Jazi M et al., 2021		NALCN-AS1
LINC02705	Increase (COVID-non ICU vs Non-COVID-non ICU)	ICU (n = 50), COVID-19 not admitted to ICU (n = 50), non-COVID-19 admitted to ICU (n = 16) and non-COVID-19 not admitted to ICU (n = 10),	PBMC	PRJNA660067	Re-analysis of RNA sequencing data published by Overmyer KA et al., 2020			Shaath H et al., 2021							NR4A1AS	Decrease (COVID-non ICU vs Non-COVID-non ICU)	Shaath H et al., 2021		NR4A1AS
LINC02863	Increase (COVID-non ICU vs Non-COVID-non ICU)	ICU (n = 50), COVID-19 not admitted to ICU (n = 50), non-COVID-19 admitted to ICU (n = 16) and non-COVID-19 not admitted to ICU (n = 10),	PBMC	PRJNA660067	Re-analysis of RNA sequencing data published by Overmyer KA et al., 2020			Shaath H et al., 2021							NRIR	Decrease (COVID-ICU vs COVID NON-ICU )	Shaath H et al., 2021		NRIR
NRIR	Increase (COVID-non ICU vs Non-COVID-non ICU)	ICU (n = 50), COVID-19 not admitted to ICU (n = 50), non-COVID-19 admitted to ICU (n = 16) and non-COVID-19 not admitted to ICU (n = 10),	PBMC	PRJNA660067	Re-analysis of RNA sequencing data published by Overmyer KA et al., 2020			Shaath H et al., 2021							ODC1-DT	Decrease (severe vs nonsevere)	Cheng J et al., 2021		ODC1-DT
RNF185-AS1	Increase (COVID-non ICU vs Non-COVID-non ICU)	ICU (n = 50), COVID-19 not admitted to ICU (n = 50), non-COVID-19 admitted to ICU (n = 16) and non-COVID-19 not admitted to ICU (n = 10),	PBMC	PRJNA660067	Re-analysis of RNA sequencing data published by Overmyer KA et al., 2020			Shaath H et al., 2021							OGFRP1	Decrease (severe vs nonsevere)	Cheng J et al., 2021		OGFRP1
SCAT8	Increase (COVID-non ICU vs Non-COVID-non ICU)	ICU (n = 50), COVID-19 not admitted to ICU (n = 50), non-COVID-19 admitted to ICU (n = 16) and non-COVID-19 not admitted to ICU (n = 10),	PBMC	PRJNA660067	Re-analysis of RNA sequencing data published by Overmyer KA et al., 2020			Shaath H et al., 2021							OSER1-DT	Decrease	Moazzam-Jazi M et al., 2021		OSER1-DT
TTN-AS1	Increase (COVID-non ICU vs Non-COVID-non ICU)	ICU (n = 50), COVID-19 not admitted to ICU (n = 50), non-COVID-19 admitted to ICU (n = 16) and non-COVID-19 not admitted to ICU (n = 10),	PBMC	PRJNA660067	Re-analysis of RNA sequencing data published by Overmyer KA et al., 2020			Shaath H et al., 2021							OVCH1-AS1	Decrease	Moazzam-Jazi M et al., 2021		OVCH1-AS1
ARAP1-AS1	Decrease (COVID-non ICU vs Non-COVID-non ICU)	ICU (n = 50), COVID-19 not admitted to ICU (n = 50), non-COVID-19 admitted to ICU (n = 16) and non-COVID-19 not admitted to ICU (n = 10),	PBMC	PRJNA660067	Re-analysis of RNA sequencing data published by Overmyer KA et al., 2020			Shaath H et al., 2021							PART1	Decreased	Laha S et al., 2021		PART1
C6orf47-AS1	Decrease (COVID-non ICU vs Non-COVID-non ICU)	ICU (n = 50), COVID-19 not admitted to ICU (n = 50), non-COVID-19 admitted to ICU (n = 16) and non-COVID-19 not admitted to ICU (n = 10),	PBMC	PRJNA660067	Re-analysis of RNA sequencing data published by Overmyer KA et al., 2020			Shaath H et al., 2021							PAXIP1-AS1	Decrease (severe vs nonsevere)	Cheng J et al., 2021		PAXIP1-AS1
NR4A1AS	Decrease (COVID-non ICU vs Non-COVID-non ICU)	ICU (n = 50), COVID-19 not admitted to ICU (n = 50), non-COVID-19 admitted to ICU (n = 16) and non-COVID-19 not admitted to ICU (n = 10),	PBMC	PRJNA660067	Re-analysis of RNA sequencing data published by Overmyer KA et al., 2020			Shaath H et al., 2021							PCCA-DT	Decrease (severe vs nonsevere)	Cheng J et al., 2021		PCCA-DT
SMIM25	Decrease (COVID-non ICU vs Non-COVID-non ICU)	ICU (n = 50), COVID-19 not admitted to ICU (n = 50), non-COVID-19 admitted to ICU (n = 16) and non-COVID-19 not admitted to ICU (n = 10),	PBMC	PRJNA660067	Re-analysis of RNA sequencing data published by Overmyer KA et al., 2020			Shaath H et al., 2021							PCED1B-AS1	Decrease (severe vs nonsevere)	Cheng J et al., 2021		PCED1B-AS1
LINC00278	Increase (severe vs non severe)	17 severe, 12 non-severe patients and 10 healthy controls	PBMC	NA	RNA sequencing	Set of lncRNA could discriminate between severe and non-severe COVID-19. Potential immunological functions of the lncRNAs mainly for the observed decrease in total lymphocytes, T cell counts, CD4 + T cell counts and B cell counts and a significant increase in procalcitonin and CRP have been inferred from the clustering of differentially expressed lncRNA.		Cheng J et al., 2021							PEG13	Decrease	Moazzam-Jazi M et al., 2021		PEG13
LINC00671	Increase (severe vs non severe)	17 severe, 12 non-severe patients and 10 healthy controls	PBMC	NA	RNA sequencing	Set of lncRNA could discriminate between severe and non-severe COVID-19. Potential immunological functions of the lncRNAs mainly for the observed decrease in total lymphocytes, T cell counts, CD4 + T cell counts and B cell counts and a significant increase in procalcitonin and CRP have been inferred from the clustering of differentially expressed lncRNA.		Cheng J et al., 2021							PHACTR2-AS1	Decrease	Moazzam-Jazi M et al., 2021		PHACTR2-AS1
LINC01127	Increase (severe vs non severe)	17 severe, 12 non-severe patients and 10 healthy controls	PBMC	NA	RNA sequencing	Set of lncRNA could discriminate between severe and non-severe COVID-19. Potential immunological functions of the lncRNAs mainly for the observed decrease in total lymphocytes, T cell counts, CD4 + T cell counts and B cell counts and a significant increase in procalcitonin and CRP have been inferred from the clustering of differentially expressed lncRNA.		Cheng J et al., 2021							PKIA-AS1	Decrease (severe vs nonsevere)	Cheng J et al., 2021		PKIA-AS1
LINC01988	Increase (severe vs non severe)	17 severe, 12 non-severe patients and 10 healthy controls	PBMC	NA	RNA sequencing	Set of lncRNA could discriminate between severe and non-severe COVID-19. Potential immunological functions of the lncRNAs mainly for the observed decrease in total lymphocytes, T cell counts, CD4 + T cell counts and B cell counts and a significant increase in procalcitonin and CRP have been inferred from the clustering of differentially expressed lncRNA.		Cheng J et al., 2021							PRNCR1	Decrease (severe vs nonsevere)	Cheng J et al., 2021		PRNCR1
LINC02207	Increase (severe vs non severe)	17 severe, 12 non-severe patients and 10 healthy controls	PBMC	NA	RNA sequencing	Set of lncRNA could discriminate between severe and non-severe COVID-19. Potential immunological functions of the lncRNAs mainly for the observed decrease in total lymphocytes, T cell counts, CD4 + T cell counts and B cell counts and a significant increase in procalcitonin and CRP have been inferred from the clustering of differentially expressed lncRNA.		Cheng J et al., 2021							PRR29-AS1	Decrease (severe vs nonsevere)	Cheng J et al., 2021		PRR29-AS1
LINC02289	Increase (severe vs non severe)	17 severe, 12 non-severe patients and 10 healthy controls	PBMC	NA	RNA sequencing	Set of lncRNA could discriminate between severe and non-severe COVID-19. Potential immunological functions of the lncRNAs mainly for the observed decrease in total lymphocytes, T cell counts, CD4 + T cell counts and B cell counts and a significant increase in procalcitonin and CRP have been inferred from the clustering of differentially expressed lncRNA.		Cheng J et al., 2021							PSMG3-AS1	Decrease	Moazzam-Jazi M et al., 2021		PSMG3-AS1
MIR3945HG	Increase (severe vs non severe)	17 severe, 12 non-severe patients and 10 healthy controls	PBMC	NA	RNA sequencing	Set of lncRNA could discriminate between severe and non-severe COVID-19. Potential immunological functions of the lncRNAs mainly for the observed decrease in total lymphocytes, T cell counts, CD4 + T cell counts and B cell counts and a significant increase in procalcitonin and CRP have been inferred from the clustering of differentially expressed lncRNA.		Cheng J et al., 2021							PTOV1-AS2	Decrease	Moazzam-Jazi M et al., 2021		PTOV1-AS2
WDFY3-AS2	Increase (severe vs non severe)	17 severe, 12 non-severe patients and 10 healthy controls	PBMC	NA	RNA sequencing	Set of lncRNA could discriminate between severe and non-severe COVID-19. Potential immunological functions of the lncRNAs mainly for the observed decrease in total lymphocytes, T cell counts, CD4 + T cell counts and B cell counts and a significant increase in procalcitonin and CRP have been inferred from the clustering of differentially expressed lncRNA.		Cheng J et al., 2021							RASA3-IT1	Decrease	Moazzam-Jazi M et al., 2021		RASA3-IT1
ARNILA	Decrease (severe vs nonsevere)	17 severe, 12 non-severe patients and 10 healthy controls	PBMC	NA	RNA sequencing	Set of lncRNA could discriminate between severe and non-severe COVID-19. Potential immunological functions of the lncRNAs mainly for the observed decrease in total lymphocytes, T cell counts, CD4 + T cell counts and B cell counts and a significant increase in procalcitonin and CRP have been inferred from the clustering of differentially expressed lncRNA.		Cheng J et al., 2021							RB1-DT	Decrease (severe vs nonsevere)	Cheng J et al., 2021		RB1-DT
ATP2B1-AS1	Decrease (severe vs nonsevere)	17 severe, 12 non-severe patients and 10 healthy controls	PBMC	NA	RNA sequencing	Set of lncRNA could discriminate between severe and non-severe COVID-19. Potential immunological functions of the lncRNAs mainly for the observed decrease in total lymphocytes, T cell counts, CD4 + T cell counts and B cell counts and a significant increase in procalcitonin and CRP have been inferred from the clustering of differentially expressed lncRNA.		Cheng J et al., 2021							RBFADN	Decrease (severe vs nonsevere)	Cheng J et al., 2021		RBFADN
BAIAP2-DT	Decrease (severe vs nonsevere)	17 severe, 12 non-severe patients and 10 healthy controls	PBMC	NA	RNA sequencing	Set of lncRNA could discriminate between severe and non-severe COVID-19. Potential immunological functions of the lncRNAs mainly for the observed decrease in total lymphocytes, T cell counts, CD4 + T cell counts and B cell counts and a significant increase in procalcitonin and CRP have been inferred from the clustering of differentially expressed lncRNA.		Cheng J et al., 2021							RFPL3S	Decrease (severe vs nonsevere)	Cheng J et al., 2021		RFPL3S
BISPR	Decrease (severe vs nonsevere)	17 severe, 12 non-severe patients and 10 healthy controls	PBMC	NA	RNA sequencing	Set of lncRNA could discriminate between severe and non-severe COVID-19. Potential immunological functions of the lncRNAs mainly for the observed decrease in total lymphocytes, T cell counts, CD4 + T cell counts and B cell counts and a significant increase in procalcitonin and CRP have been inferred from the clustering of differentially expressed lncRNA.		Cheng J et al., 2021							RFX3-AS1	Decrease (severe vs nonsevere)	Cheng J et al., 2021		RFX3-AS1
BTG3-AS1	Decrease (severe vs nonsevere)	17 severe, 12 non-severe patients and 10 healthy controls	PBMC	NA	RNA sequencing	Set of lncRNA could discriminate between severe and non-severe COVID-19. Potential immunological functions of the lncRNAs mainly for the observed decrease in total lymphocytes, T cell counts, CD4 + T cell counts and B cell counts and a significant increase in procalcitonin and CRP have been inferred from the clustering of differentially expressed lncRNA.		Cheng J et al., 2021							RNF139-AS1	Decrease (severe vs nonsevere)	Cheng J et al., 2021		RNF139-AS1
C15orf54	Decrease (severe vs nonsevere)	17 severe, 12 non-severe patients and 10 healthy controls	PBMC	NA	RNA sequencing	Set of lncRNA could discriminate between severe and non-severe COVID-19. Potential immunological functions of the lncRNAs mainly for the observed decrease in total lymphocytes, T cell counts, CD4 + T cell counts and B cell counts and a significant increase in procalcitonin and CRP have been inferred from the clustering of differentially expressed lncRNA.		Cheng J et al., 2021							RORA-AS1	Decrease	Moazzam-Jazi M et al., 2021		RORA-AS1
C22orf34	Decrease (severe vs nonsevere)	17 severe, 12 non-severe patients and 10 healthy controls	PBMC	NA	RNA sequencing	Set of lncRNA could discriminate between severe and non-severe COVID-19. Potential immunological functions of the lncRNAs mainly for the observed decrease in total lymphocytes, T cell counts, CD4 + T cell counts and B cell counts and a significant increase in procalcitonin and CRP have been inferred from the clustering of differentially expressed lncRNA.		Cheng J et al., 2021							RPL34-AS1	Decrease (severe vs nonsevere)	Cheng J et al., 2021		RPL34-AS1
C3orf35	Decrease (severe vs nonsevere)	17 severe, 12 non-severe patients and 10 healthy controls	PBMC	NA	RNA sequencing	Set of lncRNA could discriminate between severe and non-severe COVID-19. Potential immunological functions of the lncRNAs mainly for the observed decrease in total lymphocytes, T cell counts, CD4 + T cell counts and B cell counts and a significant increase in procalcitonin and CRP have been inferred from the clustering of differentially expressed lncRNA.		Cheng J et al., 2021							RRS1-AS1	Decrease (severe vs nonsevere)	Cheng J et al., 2021		RRS1-AS1
C8orf31	Decrease (severe vs nonsevere)	17 severe, 12 non-severe patients and 10 healthy controls	PBMC	NA	RNA sequencing	Set of lncRNA could discriminate between severe and non-severe COVID-19. Potential immunological functions of the lncRNAs mainly for the observed decrease in total lymphocytes, T cell counts, CD4 + T cell counts and B cell counts and a significant increase in procalcitonin and CRP have been inferred from the clustering of differentially expressed lncRNA.		Cheng J et al., 2021							SCAMP1-AS1	Decrease (severe vs nonsevere)	Cheng J et al., 2021		SCAMP1-AS1
CCAT2	Decrease (severe vs nonsevere)	17 severe, 12 non-severe patients and 10 healthy controls	PBMC	NA	RNA sequencing	Set of lncRNA could discriminate between severe and non-severe COVID-19. Potential immunological functions of the lncRNAs mainly for the observed decrease in total lymphocytes, T cell counts, CD4 + T cell counts and B cell counts and a significant increase in procalcitonin and CRP have been inferred from the clustering of differentially expressed lncRNA.		Cheng J et al., 2021							SCAT2	Decrease	Moazzam-Jazi M et al., 2021		SCAT2
CCDC18-AS1	Decrease (severe vs nonsevere)	17 severe, 12 non-severe patients and 10 healthy controls	PBMC	NA	RNA sequencing	Set of lncRNA could discriminate between severe and non-severe COVID-19. Potential immunological functions of the lncRNAs mainly for the observed decrease in total lymphocytes, T cell counts, CD4 + T cell counts and B cell counts and a significant increase in procalcitonin and CRP have been inferred from the clustering of differentially expressed lncRNA.		Cheng J et al., 2021							SEPTIN7-DT	Decrease (severe vs nonsevere)	Cheng J et al., 2021		SEPTIN7-DT
CDC37L1-DT	Decrease (severe vs nonsevere)	17 severe, 12 non-severe patients and 10 healthy controls	PBMC	NA	RNA sequencing	Set of lncRNA could discriminate between severe and non-severe COVID-19. Potential immunological functions of the lncRNAs mainly for the observed decrease in total lymphocytes, T cell counts, CD4 + T cell counts and B cell counts and a significant increase in procalcitonin and CRP have been inferred from the clustering of differentially expressed lncRNA.		Cheng J et al., 2021							SERPINB9P1	Decrease (severe vs nonsevere)	Cheng J et al., 2021		SERPINB9P1
CERNA1	Decrease (severe vs nonsevere)	17 severe, 12 non-severe patients and 10 healthy controls	PBMC	NA	RNA sequencing	Set of lncRNA could discriminate between severe and non-severe COVID-19. Potential immunological functions of the lncRNAs mainly for the observed decrease in total lymphocytes, T cell counts, CD4 + T cell counts and B cell counts and a significant increase in procalcitonin and CRP have been inferred from the clustering of differentially expressed lncRNA.		Cheng J et al., 2021							SH3BP5-AS1	Decrease	Moazzam-Jazi M et al., 2021		SH3BP5-AS1
CEROX1	Decrease (severe vs nonsevere)	17 severe, 12 non-severe patients and 10 healthy controls	PBMC	NA	RNA sequencing	Set of lncRNA could discriminate between severe and non-severe COVID-19. Potential immunological functions of the lncRNAs mainly for the observed decrease in total lymphocytes, T cell counts, CD4 + T cell counts and B cell counts and a significant increase in procalcitonin and CRP have been inferred from the clustering of differentially expressed lncRNA.		Cheng J et al., 2021							SLC25A5-AS1	Decrease (severe vs nonsevere)	Cheng J et al., 2021		SLC25A5-AS1
CNNM3-DT	Decrease (severe vs nonsevere)	17 severe, 12 non-severe patients and 10 healthy controls	PBMC	NA	RNA sequencing	Set of lncRNA could discriminate between severe and non-severe COVID-19. Potential immunological functions of the lncRNAs mainly for the observed decrease in total lymphocytes, T cell counts, CD4 + T cell counts and B cell counts and a significant increase in procalcitonin and CRP have been inferred from the clustering of differentially expressed lncRNA.		Cheng J et al., 2021							SNHG1	Decrease (severe vs nonsevere)	Cheng J et al., 2021		SNHG1
COPDA1	Decrease (severe vs nonsevere)	17 severe, 12 non-severe patients and 10 healthy controls	PBMC	NA	RNA sequencing	Set of lncRNA could discriminate between severe and non-severe COVID-19. Potential immunological functions of the lncRNAs mainly for the observed decrease in total lymphocytes, T cell counts, CD4 + T cell counts and B cell counts and a significant increase in procalcitonin and CRP have been inferred from the clustering of differentially expressed lncRNA.		Cheng J et al., 2021							SNHG11	Decrease (severe vs nonsevere)	Cheng J et al., 2021		SNHG11
CR381653.1	Decrease (severe vs nonsevere)	17 severe, 12 non-severe patients and 10 healthy controls	PBMC	NA	RNA sequencing	Set of lncRNA could discriminate between severe and non-severe COVID-19. Potential immunological functions of the lncRNAs mainly for the observed decrease in total lymphocytes, T cell counts, CD4 + T cell counts and B cell counts and a significant increase in procalcitonin and CRP have been inferred from the clustering of differentially expressed lncRNA.		Cheng J et al., 2021							SNHG15	Decrease (severe vs nonsevere)	Cheng J et al., 2021		SNHG15
DANCR	Decrease (severe vs nonsevere)	17 severe, 12 non-severe patients and 10 healthy controls	PBMC	NA	RNA sequencing	Set of lncRNA could discriminate between severe and non-severe COVID-19. Potential immunological functions of the lncRNAs mainly for the observed decrease in total lymphocytes, T cell counts, CD4 + T cell counts and B cell counts and a significant increase in procalcitonin and CRP have been inferred from the clustering of differentially expressed lncRNA.		Cheng J et al., 2021							SNHG17	Decrease (severe vs nonsevere)	Cheng J et al., 2021		SNHG17
DISC1FP1	Decrease (severe vs nonsevere)	17 severe, 12 non-severe patients and 10 healthy controls	PBMC	NA	RNA sequencing	Set of lncRNA could discriminate between severe and non-severe COVID-19. Potential immunological functions of the lncRNAs mainly for the observed decrease in total lymphocytes, T cell counts, CD4 + T cell counts and B cell counts and a significant increase in procalcitonin and CRP have been inferred from the clustering of differentially expressed lncRNA.		Cheng J et al., 2021							SNHG19	Decrease (severe vs nonsevere)	Cheng J et al., 2021		SNHG19
DLEU1	Decrease (severe vs nonsevere)	17 severe, 12 non-severe patients and 10 healthy controls	PBMC	NA	RNA sequencing	Set of lncRNA could discriminate between severe and non-severe COVID-19. Potential immunological functions of the lncRNAs mainly for the observed decrease in total lymphocytes, T cell counts, CD4 + T cell counts and B cell counts and a significant increase in procalcitonin and CRP have been inferred from the clustering of differentially expressed lncRNA.		Cheng J et al., 2021							SNHG25	Decrease (severe vs nonsevere)	Cheng J et al., 2021		SNHG25
EBLN3P	Decrease (severe vs nonsevere)	17 severe, 12 non-severe patients and 10 healthy controls	PBMC	NA	RNA sequencing	Set of lncRNA could discriminate between severe and non-severe COVID-19. Potential immunological functions of the lncRNAs mainly for the observed decrease in total lymphocytes, T cell counts, CD4 + T cell counts and B cell counts and a significant increase in procalcitonin and CRP have been inferred from the clustering of differentially expressed lncRNA.		Cheng J et al., 2021							SNHG26	Decrease (severe vs nonsevere)	Cheng J et al., 2021		SNHG26
EPB41L4A-AS1	Decrease (severe vs nonsevere)	17 severe, 12 non-severe patients and 10 healthy controls	PBMC	NA	RNA sequencing	Set of lncRNA could discriminate between severe and non-severe COVID-19. Potential immunological functions of the lncRNAs mainly for the observed decrease in total lymphocytes, T cell counts, CD4 + T cell counts and B cell counts and a significant increase in procalcitonin and CRP have been inferred from the clustering of differentially expressed lncRNA.		Cheng J et al., 2021							SNHG29	Decrease	Moazzam-Jazi M et al., 2021		SNHG29
ERVK13-1	Decrease (severe vs nonsevere)	17 severe, 12 non-severe patients and 10 healthy controls	PBMC	NA	RNA sequencing	Set of lncRNA could discriminate between severe and non-severe COVID-19. Potential immunological functions of the lncRNAs mainly for the observed decrease in total lymphocytes, T cell counts, CD4 + T cell counts and B cell counts and a significant increase in procalcitonin and CRP have been inferred from the clustering of differentially expressed lncRNA.		Cheng J et al., 2021							SNHG3	Decrease (severe vs nonsevere)	Cheng J et al., 2021		SNHG3
FAM111A-DT	Decrease (severe vs nonsevere)	17 severe, 12 non-severe patients and 10 healthy controls	PBMC	NA	RNA sequencing	Set of lncRNA could discriminate between severe and non-severe COVID-19. Potential immunological functions of the lncRNAs mainly for the observed decrease in total lymphocytes, T cell counts, CD4 + T cell counts and B cell counts and a significant increase in procalcitonin and CRP have been inferred from the clustering of differentially expressed lncRNA.		Cheng J et al., 2021							SNHG32	Decrease	Moazzam-Jazi M et al., 2021		SNHG32
FAM160A1-DT	Decrease (severe vs nonsevere)	17 severe, 12 non-severe patients and 10 healthy controls	PBMC	NA	RNA sequencing	Set of lncRNA could discriminate between severe and non-severe COVID-19. Potential immunological functions of the lncRNAs mainly for the observed decrease in total lymphocytes, T cell counts, CD4 + T cell counts and B cell counts and a significant increase in procalcitonin and CRP have been inferred from the clustering of differentially expressed lncRNA.		Cheng J et al., 2021							SNHG4	Decrease (severe vs nonsevere)	Cheng J et al., 2021		SNHG4
FAM215B	Decrease (severe vs nonsevere)	17 severe, 12 non-severe patients and 10 healthy controls	PBMC	NA	RNA sequencing	Set of lncRNA could discriminate between severe and non-severe COVID-19. Potential immunological functions of the lncRNAs mainly for the observed decrease in total lymphocytes, T cell counts, CD4 + T cell counts and B cell counts and a significant increase in procalcitonin and CRP have been inferred from the clustering of differentially expressed lncRNA.		Cheng J et al., 2021							SNHG5	Decrease (severe vs nonsevere)	Cheng J et al., 2021		SNHG5
FAM225A	Decrease (severe vs nonsevere)	17 severe, 12 non-severe patients and 10 healthy controls	PBMC	NA	RNA sequencing	Set of lncRNA could discriminate between severe and non-severe COVID-19. Potential immunological functions of the lncRNAs mainly for the observed decrease in total lymphocytes, T cell counts, CD4 + T cell counts and B cell counts and a significant increase in procalcitonin and CRP have been inferred from the clustering of differentially expressed lncRNA.		Cheng J et al., 2021							SNHG7	Decrease	Moazzam-Jazi M et al., 2021		SNHG7
FAM225B	Decrease (severe vs nonsevere)	17 severe, 12 non-severe patients and 10 healthy controls	PBMC	NA	RNA sequencing	Set of lncRNA could discriminate between severe and non-severe COVID-19. Potential immunological functions of the lncRNAs mainly for the observed decrease in total lymphocytes, T cell counts, CD4 + T cell counts and B cell counts and a significant increase in procalcitonin and CRP have been inferred from the clustering of differentially expressed lncRNA.		Cheng J et al., 2021							SNHG9	Decrease (severe vs nonsevere)	Cheng J et al., 2021		SNHG9
FAM66A	Decrease (severe vs nonsevere)	17 severe, 12 non-severe patients and 10 healthy controls	PBMC	NA	RNA sequencing	Set of lncRNA could discriminate between severe and non-severe COVID-19. Potential immunological functions of the lncRNAs mainly for the observed decrease in total lymphocytes, T cell counts, CD4 + T cell counts and B cell counts and a significant increase in procalcitonin and CRP have been inferred from the clustering of differentially expressed lncRNA.		Cheng J et al., 2021							SRP14-AS1	Decrease (severe vs nonsevere)	Cheng J et al., 2021		SRP14-AS1
FAM66B	Decrease (severe vs nonsevere)	17 severe, 12 non-severe patients and 10 healthy controls	PBMC	NA	RNA sequencing	Set of lncRNA could discriminate between severe and non-severe COVID-19. Potential immunological functions of the lncRNAs mainly for the observed decrease in total lymphocytes, T cell counts, CD4 + T cell counts and B cell counts and a significant increase in procalcitonin and CRP have been inferred from the clustering of differentially expressed lncRNA.		Cheng J et al., 2021							ST3GAL5-AS1	Decrease (severe vs nonsevere)	Cheng J et al., 2021		ST3GAL5-AS1
FOXD2-AS1	Decrease (severe vs nonsevere)	17 severe, 12 non-severe patients and 10 healthy controls	PBMC	NA	RNA sequencing	Set of lncRNA could discriminate between severe and non-severe COVID-19. Potential immunological functions of the lncRNAs mainly for the observed decrease in total lymphocytes, T cell counts, CD4 + T cell counts and B cell counts and a significant increase in procalcitonin and CRP have been inferred from the clustering of differentially expressed lncRNA.		Cheng J et al., 2021							ST8SIA6-AS1	Decrease	Moazzam-Jazi M et al., 2021		ST8SIA6-AS1
FRG1-DT	Decrease (severe vs nonsevere)	17 severe, 12 non-severe patients and 10 healthy controls	PBMC	NA	RNA sequencing	Set of lncRNA could discriminate between severe and non-severe COVID-19. Potential immunological functions of the lncRNAs mainly for the observed decrease in total lymphocytes, T cell counts, CD4 + T cell counts and B cell counts and a significant increase in procalcitonin and CRP have been inferred from the clustering of differentially expressed lncRNA.		Cheng J et al., 2021							SUCLG2-AS1	Decrease (severe vs nonsevere)	Cheng J et al., 2021		SUCLG2-AS1
GARS1-DT	Decrease (severe vs nonsevere)	17 severe, 12 non-severe patients and 10 healthy controls	PBMC	NA	RNA sequencing	Set of lncRNA could discriminate between severe and non-severe COVID-19. Potential immunological functions of the lncRNAs mainly for the observed decrease in total lymphocytes, T cell counts, CD4 + T cell counts and B cell counts and a significant increase in procalcitonin and CRP have been inferred from the clustering of differentially expressed lncRNA.		Cheng J et al., 2021							TCL6	Decrease (severe vs nonsevere)	Cheng J et al., 2021		TCL6
GAS5	Decrease (severe vs nonsevere)	17 severe, 12 non-severe patients and 10 healthy controls	PBMC	NA	RNA sequencing	Set of lncRNA could discriminate between severe and non-severe COVID-19. Potential immunological functions of the lncRNAs mainly for the observed decrease in total lymphocytes, T cell counts, CD4 + T cell counts and B cell counts and a significant increase in procalcitonin and CRP have been inferred from the clustering of differentially expressed lncRNA.		Cheng J et al., 2021							TMEM147-AS1	Decrease	Moazzam-Jazi M et al., 2021		TMEM147-AS1
GMDS-DT	Decrease (severe vs nonsevere)	17 severe, 12 non-severe patients and 10 healthy controls	PBMC	NA	RNA sequencing	Set of lncRNA could discriminate between severe and non-severe COVID-19. Potential immunological functions of the lncRNAs mainly for the observed decrease in total lymphocytes, T cell counts, CD4 + T cell counts and B cell counts and a significant increase in procalcitonin and CRP have been inferred from the clustering of differentially expressed lncRNA.		Cheng J et al., 2021							TMEM202-AS1	Decrease (severe vs nonsevere)	Cheng J et al., 2021		TMEM202-AS1
GTSCR1	Decrease (severe vs nonsevere)	17 severe, 12 non-severe patients and 10 healthy controls	PBMC	NA	RNA sequencing	Set of lncRNA could discriminate between severe and non-severe COVID-19. Potential immunological functions of the lncRNAs mainly for the observed decrease in total lymphocytes, T cell counts, CD4 + T cell counts and B cell counts and a significant increase in procalcitonin and CRP have been inferred from the clustering of differentially expressed lncRNA.		Cheng J et al., 2021							TNRC6C-AS1	Decrease	Moazzam-Jazi M et al., 2021		TNRC6C-AS1
HAR1A	Decrease (severe vs nonsevere)	17 severe, 12 non-severe patients and 10 healthy controls	PBMC	NA	RNA sequencing	Set of lncRNA could discriminate between severe and non-severe COVID-19. Potential immunological functions of the lncRNAs mainly for the observed decrease in total lymphocytes, T cell counts, CD4 + T cell counts and B cell counts and a significant increase in procalcitonin and CRP have been inferred from the clustering of differentially expressed lncRNA.		Cheng J et al., 2021							TRG-AS1	Decrease (COVID-ICU vs COVID NON-ICU )	Shaath H et al., 2021		TRG-AS1
HAR1B	Decrease (severe vs nonsevere)	17 severe, 12 non-severe patients and 10 healthy controls	PBMC	NA	RNA sequencing	Set of lncRNA could discriminate between severe and non-severe COVID-19. Potential immunological functions of the lncRNAs mainly for the observed decrease in total lymphocytes, T cell counts, CD4 + T cell counts and B cell counts and a significant increase in procalcitonin and CRP have been inferred from the clustering of differentially expressed lncRNA.		Cheng J et al., 2021							UGDH-AS1	Decreased	Turjya RR et al., 2020		UGDH-AS1
IATPR	Decrease (severe vs nonsevere)	17 severe, 12 non-severe patients and 10 healthy controls	PBMC	NA	RNA sequencing	Set of lncRNA could discriminate between severe and non-severe COVID-19. Potential immunological functions of the lncRNAs mainly for the observed decrease in total lymphocytes, T cell counts, CD4 + T cell counts and B cell counts and a significant increase in procalcitonin and CRP have been inferred from the clustering of differentially expressed lncRNA.		Cheng J et al., 2021							VASH1-AS1	Decrease (severe vs nonsevere)	Cheng J et al., 2021		VASH1-AS1
ILF3-DT	Decrease (severe vs nonsevere)	17 severe, 12 non-severe patients and 10 healthy controls	PBMC	NA	RNA sequencing	Set of lncRNA could discriminate between severe and non-severe COVID-19. Potential immunological functions of the lncRNAs mainly for the observed decrease in total lymphocytes, T cell counts, CD4 + T cell counts and B cell counts and a significant increase in procalcitonin and CRP have been inferred from the clustering of differentially expressed lncRNA.		Cheng J et al., 2021							XIST	Decrease (severe vs nonsevere)	Cheng J et al., 2021		XIST
IQCH-AS1	Decrease (severe vs nonsevere)	17 severe, 12 non-severe patients and 10 healthy controls	PBMC	NA	RNA sequencing	Set of lncRNA could discriminate between severe and non-severe COVID-19. Potential immunological functions of the lncRNAs mainly for the observed decrease in total lymphocytes, T cell counts, CD4 + T cell counts and B cell counts and a significant increase in procalcitonin and CRP have been inferred from the clustering of differentially expressed lncRNA.		Cheng J et al., 2021							YTHDF3-AS1	Decrease (severe vs nonsevere)	Cheng J et al., 2021		YTHDF3-AS1
IRF1-AS1	Decrease (severe vs nonsevere)	17 severe, 12 non-severe patients and 10 healthy controls	PBMC	NA	RNA sequencing	Set of lncRNA could discriminate between severe and non-severe COVID-19. Potential immunological functions of the lncRNAs mainly for the observed decrease in total lymphocytes, T cell counts, CD4 + T cell counts and B cell counts and a significant increase in procalcitonin and CRP have been inferred from the clustering of differentially expressed lncRNA.		Cheng J et al., 2021							ZBTB20-AS1	Decrease	Moazzam-Jazi M et al., 2021		ZBTB20-AS1
JPX	Decrease (severe vs nonsevere)	17 severe, 12 non-severe patients and 10 healthy controls	PBMC	NA	RNA sequencing	Set of lncRNA could discriminate between severe and non-severe COVID-19. Potential immunological functions of the lncRNAs mainly for the observed decrease in total lymphocytes, T cell counts, CD4 + T cell counts and B cell counts and a significant increase in procalcitonin and CRP have been inferred from the clustering of differentially expressed lncRNA.		Cheng J et al., 2021							ZNF295-AS1	Decrease (severe vs nonsevere)	Cheng J et al., 2021		ZNF295-AS1
KDM2B-DT	Decrease (severe vs nonsevere)	17 severe, 12 non-severe patients and 10 healthy controls	PBMC	NA	RNA sequencing	Set of lncRNA could discriminate between severe and non-severe COVID-19. Potential immunological functions of the lncRNAs mainly for the observed decrease in total lymphocytes, T cell counts, CD4 + T cell counts and B cell counts and a significant increase in procalcitonin and CRP have been inferred from the clustering of differentially expressed lncRNA.		Cheng J et al., 2021							CEBPA-DT	Increase	Moazzam-Jazi M et al., 2021
LERFS	Decrease (severe vs nonsevere)	17 severe, 12 non-severe patients and 10 healthy controls	PBMC	NA	RNA sequencing	Set of lncRNA could discriminate between severe and non-severe COVID-19. Potential immunological functions of the lncRNAs mainly for the observed decrease in total lymphocytes, T cell counts, CD4 + T cell counts and B cell counts and a significant increase in procalcitonin and CRP have been inferred from the clustering of differentially expressed lncRNA.		Cheng J et al., 2021							CYP1B1-AS1	Increase	Moazzam-Jazi M et al., 2021
LINC00092	Decrease (severe vs nonsevere)	17 severe, 12 non-severe patients and 10 healthy controls	PBMC	NA	RNA sequencing	Set of lncRNA could discriminate between severe and non-severe COVID-19. Potential immunological functions of the lncRNAs mainly for the observed decrease in total lymphocytes, T cell counts, CD4 + T cell counts and B cell counts and a significant increase in procalcitonin and CRP have been inferred from the clustering of differentially expressed lncRNA.		Cheng J et al., 2021							FAM198B-AS1	Increase	Moazzam-Jazi M et al., 2021
LINC00106	Decrease (severe vs nonsevere)	17 severe, 12 non-severe patients and 10 healthy controls	PBMC	NA	RNA sequencing	Set of lncRNA could discriminate between severe and non-severe COVID-19. Potential immunological functions of the lncRNAs mainly for the observed decrease in total lymphocytes, T cell counts, CD4 + T cell counts and B cell counts and a significant increase in procalcitonin and CRP have been inferred from the clustering of differentially expressed lncRNA.		Cheng J et al., 2021							LASI(antisensestrandtoICAM-1,notcataloguedinNCBIandEnsembldatabase)	Increase	Devadoss D et al., 2021 (pre-print)
LINC00106	Decrease (severe vs nonsevere)	17 severe, 12 non-severe patients and 10 healthy controls	PBMC	NA	RNA sequencing	Set of lncRNA could discriminate between severe and non-severe COVID-19. Potential immunological functions of the lncRNAs mainly for the observed decrease in total lymphocytes, T cell counts, CD4 + T cell counts and B cell counts and a significant increase in procalcitonin and CRP have been inferred from the clustering of differentially expressed lncRNA.		Cheng J et al., 2021							LINC00482	Increase	Moazzam-Jazi M et al., 2021
LINC00115	Decrease (severe vs nonsevere)	17 severe, 12 non-severe patients and 10 healthy controls	PBMC	NA	RNA sequencing	Set of lncRNA could discriminate between severe and non-severe COVID-19. Potential immunological functions of the lncRNAs mainly for the observed decrease in total lymphocytes, T cell counts, CD4 + T cell counts and B cell counts and a significant increase in procalcitonin and CRP have been inferred from the clustering of differentially expressed lncRNA.		Cheng J et al., 2021							LINC01547	Increase	Moazzam-Jazi M et al., 2021
LINC00265	Decrease (severe vs nonsevere)	17 severe, 12 non-severe patients and 10 healthy controls	PBMC	NA	RNA sequencing	Set of lncRNA could discriminate between severe and non-severe COVID-19. Potential immunological functions of the lncRNAs mainly for the observed decrease in total lymphocytes, T cell counts, CD4 + T cell counts and B cell counts and a significant increase in procalcitonin and CRP have been inferred from the clustering of differentially expressed lncRNA.		Cheng J et al., 2021							LINC02724	Increase	Moazzam-Jazi M et al., 2021
LINC00298	Decrease (severe vs nonsevere)	17 severe, 12 non-severe patients and 10 healthy controls	PBMC	NA	RNA sequencing	Set of lncRNA could discriminate between severe and non-severe COVID-19. Potential immunological functions of the lncRNAs mainly for the observed decrease in total lymphocytes, T cell counts, CD4 + T cell counts and B cell counts and a significant increase in procalcitonin and CRP have been inferred from the clustering of differentially expressed lncRNA.		Cheng J et al., 2021							LINC02777	Increase	Moazzam-Jazi M et al., 2021
LINC00299	Decrease (severe vs nonsevere)	17 severe, 12 non-severe patients and 10 healthy controls	PBMC	NA	RNA sequencing	Set of lncRNA could discriminate between severe and non-severe COVID-19. Potential immunological functions of the lncRNAs mainly for the observed decrease in total lymphocytes, T cell counts, CD4 + T cell counts and B cell counts and a significant increase in procalcitonin and CRP have been inferred from the clustering of differentially expressed lncRNA.		Cheng J et al., 2021							LINC02785	Increase	Moazzam-Jazi M et al., 2021
LINC00304	Decrease (severe vs nonsevere)	17 severe, 12 non-severe patients and 10 healthy controls	PBMC	NA	RNA sequencing	Set of lncRNA could discriminate between severe and non-severe COVID-19. Potential immunological functions of the lncRNAs mainly for the observed decrease in total lymphocytes, T cell counts, CD4 + T cell counts and B cell counts and a significant increase in procalcitonin and CRP have been inferred from the clustering of differentially expressed lncRNA.		Cheng J et al., 2021							TOSL(TNFAIP3-oppositestrandlncRNA,notcataloguedinNCBIandEnsembldatabase	Increase	Devadoss D et al., 2021 (pre-print)
LINC00310	Decrease (severe vs nonsevere)	17 severe, 12 non-severe patients and 10 healthy controls	PBMC	NA	RNA sequencing	Set of lncRNA could discriminate between severe and non-severe COVID-19. Potential immunological functions of the lncRNAs mainly for the observed decrease in total lymphocytes, T cell counts, CD4 + T cell counts and B cell counts and a significant increase in procalcitonin and CRP have been inferred from the clustering of differentially expressed lncRNA.		Cheng J et al., 2021							ACAP2-IT1	Increase	Moazzam-Jazi M et al., 2021
LINC00334	Decrease (severe vs nonsevere)	17 severe, 12 non-severe patients and 10 healthy controls	PBMC	NA	RNA sequencing	Set of lncRNA could discriminate between severe and non-severe COVID-19. Potential immunological functions of the lncRNAs mainly for the observed decrease in total lymphocytes, T cell counts, CD4 + T cell counts and B cell counts and a significant increase in procalcitonin and CRP have been inferred from the clustering of differentially expressed lncRNA.		Cheng J et al., 2021							APTR	Increase	Moazzam-Jazi M et al., 2021
LINC00342	Decrease (severe vs nonsevere)	17 severe, 12 non-severe patients and 10 healthy controls	PBMC	NA	RNA sequencing	Set of lncRNA could discriminate between severe and non-severe COVID-19. Potential immunological functions of the lncRNAs mainly for the observed decrease in total lymphocytes, T cell counts, CD4 + T cell counts and B cell counts and a significant increase in procalcitonin and CRP have been inferred from the clustering of differentially expressed lncRNA.		Cheng J et al., 2021							CCR5AS	Increase	Moazzam-Jazi M et al., 2021
LINC00381	Decrease (severe vs nonsevere)	17 severe, 12 non-severe patients and 10 healthy controls	PBMC	NA	RNA sequencing	Set of lncRNA could discriminate between severe and non-severe COVID-19. Potential immunological functions of the lncRNAs mainly for the observed decrease in total lymphocytes, T cell counts, CD4 + T cell counts and B cell counts and a significant increase in procalcitonin and CRP have been inferred from the clustering of differentially expressed lncRNA.		Cheng J et al., 2021							CDKN2B-AS1	Increase	Moazzam-Jazi M et al., 2021
LINC00402	Decrease (severe vs nonsevere)	17 severe, 12 non-severe patients and 10 healthy controls	PBMC	NA	RNA sequencing	Set of lncRNA could discriminate between severe and non-severe COVID-19. Potential immunological functions of the lncRNAs mainly for the observed decrease in total lymphocytes, T cell counts, CD4 + T cell counts and B cell counts and a significant increase in procalcitonin and CRP have been inferred from the clustering of differentially expressed lncRNA.		Cheng J et al., 2021							COLCA1	Increase	Moazzam-Jazi M et al., 2021
LINC00426	Decrease (severe vs nonsevere)	17 severe, 12 non-severe patients and 10 healthy controls	PBMC	NA	RNA sequencing	Set of lncRNA could discriminate between severe and non-severe COVID-19. Potential immunological functions of the lncRNAs mainly for the observed decrease in total lymphocytes, T cell counts, CD4 + T cell counts and B cell counts and a significant increase in procalcitonin and CRP have been inferred from the clustering of differentially expressed lncRNA.		Cheng J et al., 2021							COX10-AS1	Increase	Moazzam-Jazi M et al., 2021
LINC00427	Decrease (severe vs nonsevere)	17 severe, 12 non-severe patients and 10 healthy controls	PBMC	NA	RNA sequencing	Set of lncRNA could discriminate between severe and non-severe COVID-19. Potential immunological functions of the lncRNAs mainly for the observed decrease in total lymphocytes, T cell counts, CD4 + T cell counts and B cell counts and a significant increase in procalcitonin and CRP have been inferred from the clustering of differentially expressed lncRNA.		Cheng J et al., 2021							CRNDE	Increase	Moazzam-Jazi M et al., 2021
LINC00467	Decrease (severe vs nonsevere)	17 severe, 12 non-severe patients and 10 healthy controls	PBMC	NA	RNA sequencing	Set of lncRNA could discriminate between severe and non-severe COVID-19. Potential immunological functions of the lncRNAs mainly for the observed decrease in total lymphocytes, T cell counts, CD4 + T cell counts and B cell counts and a significant increase in procalcitonin and CRP have been inferred from the clustering of differentially expressed lncRNA.		Cheng J et al., 2021							CYTOR	Increase	Moazzam-Jazi M et al., 2021
LINC00469	Decrease (severe vs nonsevere)	17 severe, 12 non-severe patients and 10 healthy controls	PBMC	NA	RNA sequencing	Set of lncRNA could discriminate between severe and non-severe COVID-19. Potential immunological functions of the lncRNAs mainly for the observed decrease in total lymphocytes, T cell counts, CD4 + T cell counts and B cell counts and a significant increase in procalcitonin and CRP have been inferred from the clustering of differentially expressed lncRNA.		Cheng J et al., 2021							DLEU2	Increase	Moazzam-Jazi M et al., 2021
LINC00476	Decrease (severe vs nonsevere)	17 severe, 12 non-severe patients and 10 healthy controls	PBMC	NA	RNA sequencing	Set of lncRNA could discriminate between severe and non-severe COVID-19. Potential immunological functions of the lncRNAs mainly for the observed decrease in total lymphocytes, T cell counts, CD4 + T cell counts and B cell counts and a significant increase in procalcitonin and CRP have been inferred from the clustering of differentially expressed lncRNA.		Cheng J et al., 2021							DLGAP1-AS1	Increase	Moazzam-Jazi M et al., 2021
LINC00487	Decrease (severe vs nonsevere)	17 severe, 12 non-severe patients and 10 healthy controls	PBMC	NA	RNA sequencing	Set of lncRNA could discriminate between severe and non-severe COVID-19. Potential immunological functions of the lncRNAs mainly for the observed decrease in total lymphocytes, T cell counts, CD4 + T cell counts and B cell counts and a significant increase in procalcitonin and CRP have been inferred from the clustering of differentially expressed lncRNA.		Cheng J et al., 2021							EIF3J-DT	Increase	Moazzam-Jazi M et al., 2021
LINC00494	Decrease (severe vs nonsevere)	17 severe, 12 non-severe patients and 10 healthy controls	PBMC	NA	RNA sequencing	Set of lncRNA could discriminate between severe and non-severe COVID-19. Potential immunological functions of the lncRNAs mainly for the observed decrease in total lymphocytes, T cell counts, CD4 + T cell counts and B cell counts and a significant increase in procalcitonin and CRP have been inferred from the clustering of differentially expressed lncRNA.		Cheng J et al., 2021							H19	Increase	Moazzam-Jazi M et al., 2021
LINC00526	Decrease (severe vs nonsevere)	17 severe, 12 non-severe patients and 10 healthy controls	PBMC	NA	RNA sequencing	Set of lncRNA could discriminate between severe and non-severe COVID-19. Potential immunological functions of the lncRNAs mainly for the observed decrease in total lymphocytes, T cell counts, CD4 + T cell counts and B cell counts and a significant increase in procalcitonin and CRP have been inferred from the clustering of differentially expressed lncRNA.		Cheng J et al., 2021							HEIH	Increase	Moazzam-Jazi M et al., 2021
LINC00544	Decrease (severe vs nonsevere)	17 severe, 12 non-severe patients and 10 healthy controls	PBMC	NA	RNA sequencing	Set of lncRNA could discriminate between severe and non-severe COVID-19. Potential immunological functions of the lncRNAs mainly for the observed decrease in total lymphocytes, T cell counts, CD4 + T cell counts and B cell counts and a significant increase in procalcitonin and CRP have been inferred from the clustering of differentially expressed lncRNA.		Cheng J et al., 2021							IL10RB-DT	Increase	Moazzam-Jazi M et al., 2021
LINC00562	Decrease (severe vs nonsevere)	17 severe, 12 non-severe patients and 10 healthy controls	PBMC	NA	RNA sequencing	Set of lncRNA could discriminate between severe and non-severe COVID-19. Potential immunological functions of the lncRNAs mainly for the observed decrease in total lymphocytes, T cell counts, CD4 + T cell counts and B cell counts and a significant increase in procalcitonin and CRP have been inferred from the clustering of differentially expressed lncRNA.		Cheng J et al., 2021							KLHL6-AS1	Increase	Moazzam-Jazi M et al., 2021
LINC00563	Decrease (severe vs nonsevere)	17 severe, 12 non-severe patients and 10 healthy controls	PBMC	NA	RNA sequencing	Set of lncRNA could discriminate between severe and non-severe COVID-19. Potential immunological functions of the lncRNAs mainly for the observed decrease in total lymphocytes, T cell counts, CD4 + T cell counts and B cell counts and a significant increase in procalcitonin and CRP have been inferred from the clustering of differentially expressed lncRNA.		Cheng J et al., 2021							LINC00632	Increase	Moazzam-Jazi M et al., 2021
LINC00565	Decrease (severe vs nonsevere)	17 severe, 12 non-severe patients and 10 healthy controls	PBMC	NA	RNA sequencing	Set of lncRNA could discriminate between severe and non-severe COVID-19. Potential immunological functions of the lncRNAs mainly for the observed decrease in total lymphocytes, T cell counts, CD4 + T cell counts and B cell counts and a significant increase in procalcitonin and CRP have been inferred from the clustering of differentially expressed lncRNA.		Cheng J et al., 2021							LINC01133	Increase	Moazzam-Jazi M et al., 2021
LINC00598	Decrease (severe vs nonsevere)	17 severe, 12 non-severe patients and 10 healthy controls	PBMC	NA	RNA sequencing	Set of lncRNA could discriminate between severe and non-severe COVID-19. Potential immunological functions of the lncRNAs mainly for the observed decrease in total lymphocytes, T cell counts, CD4 + T cell counts and B cell counts and a significant increase in procalcitonin and CRP have been inferred from the clustering of differentially expressed lncRNA.		Cheng J et al., 2021							LINC01176	Increase	Moazzam-Jazi M et al., 2021
LINC00630	Decrease (severe vs nonsevere)	17 severe, 12 non-severe patients and 10 healthy controls	PBMC	NA	RNA sequencing	Set of lncRNA could discriminate between severe and non-severe COVID-19. Potential immunological functions of the lncRNAs mainly for the observed decrease in total lymphocytes, T cell counts, CD4 + T cell counts and B cell counts and a significant increase in procalcitonin and CRP have been inferred from the clustering of differentially expressed lncRNA.		Cheng J et al., 2021							LINC01232	Increase	Moazzam-Jazi M et al., 2021
LINC00641	Decrease (severe vs nonsevere)	17 severe, 12 non-severe patients and 10 healthy controls	PBMC	NA	RNA sequencing	Set of lncRNA could discriminate between severe and non-severe COVID-19. Potential immunological functions of the lncRNAs mainly for the observed decrease in total lymphocytes, T cell counts, CD4 + T cell counts and B cell counts and a significant increase in procalcitonin and CRP have been inferred from the clustering of differentially expressed lncRNA.		Cheng J et al., 2021							LINC01278	Increase	Moazzam-Jazi M et al., 2021
LINC00653	Decrease (severe vs nonsevere)	17 severe, 12 non-severe patients and 10 healthy controls	PBMC	NA	RNA sequencing	Set of lncRNA could discriminate between severe and non-severe COVID-19. Potential immunological functions of the lncRNAs mainly for the observed decrease in total lymphocytes, T cell counts, CD4 + T cell counts and B cell counts and a significant increase in procalcitonin and CRP have been inferred from the clustering of differentially expressed lncRNA.		Cheng J et al., 2021							LINC01504	Increase	Moazzam-Jazi M et al., 2021
LINC00662	Decrease (severe vs nonsevere)	17 severe, 12 non-severe patients and 10 healthy controls	PBMC	NA	RNA sequencing	Set of lncRNA could discriminate between severe and non-severe COVID-19. Potential immunological functions of the lncRNAs mainly for the observed decrease in total lymphocytes, T cell counts, CD4 + T cell counts and B cell counts and a significant increase in procalcitonin and CRP have been inferred from the clustering of differentially expressed lncRNA.		Cheng J et al., 2021							LINC02185	Increase	Moazzam-Jazi M et al., 2021
LINC00663	Decrease (severe vs nonsevere)	17 severe, 12 non-severe patients and 10 healthy controls	PBMC	NA	RNA sequencing	Set of lncRNA could discriminate between severe and non-severe COVID-19. Potential immunological functions of the lncRNAs mainly for the observed decrease in total lymphocytes, T cell counts, CD4 + T cell counts and B cell counts and a significant increase in procalcitonin and CRP have been inferred from the clustering of differentially expressed lncRNA.		Cheng J et al., 2021							LINC02541	Increase	Moazzam-Jazi M et al., 2021
LINC00664	Decrease (severe vs nonsevere)	17 severe, 12 non-severe patients and 10 healthy controls	PBMC	NA	RNA sequencing	Set of lncRNA could discriminate between severe and non-severe COVID-19. Potential immunological functions of the lncRNAs mainly for the observed decrease in total lymphocytes, T cell counts, CD4 + T cell counts and B cell counts and a significant increase in procalcitonin and CRP have been inferred from the clustering of differentially expressed lncRNA.		Cheng J et al., 2021							MINCR	Increase	Moazzam-Jazi M et al., 2021
LINC00665	Decrease (severe vs nonsevere)	17 severe, 12 non-severe patients and 10 healthy controls	PBMC	NA	RNA sequencing	Set of lncRNA could discriminate between severe and non-severe COVID-19. Potential immunological functions of the lncRNAs mainly for the observed decrease in total lymphocytes, T cell counts, CD4 + T cell counts and B cell counts and a significant increase in procalcitonin and CRP have been inferred from the clustering of differentially expressed lncRNA.		Cheng J et al., 2021							MIR4458HG	Increase	Moazzam-Jazi M et al., 2021
LINC00667	Decrease (severe vs nonsevere)	17 severe, 12 non-severe patients and 10 healthy controls	PBMC	NA	RNA sequencing	Set of lncRNA could discriminate between severe and non-severe COVID-19. Potential immunological functions of the lncRNAs mainly for the observed decrease in total lymphocytes, T cell counts, CD4 + T cell counts and B cell counts and a significant increase in procalcitonin and CRP have been inferred from the clustering of differentially expressed lncRNA.		Cheng J et al., 2021							OTUD6B-AS1	Increase	Moazzam-Jazi M et al., 2021
LINC00824	Decrease (severe vs nonsevere)	17 severe, 12 non-severe patients and 10 healthy controls	PBMC	NA	RNA sequencing	Set of lncRNA could discriminate between severe and non-severe COVID-19. Potential immunological functions of the lncRNAs mainly for the observed decrease in total lymphocytes, T cell counts, CD4 + T cell counts and B cell counts and a significant increase in procalcitonin and CRP have been inferred from the clustering of differentially expressed lncRNA.		Cheng J et al., 2021							PAXIP1-AS2	Increase	Moazzam-Jazi M et al., 2021
LINC00847	Decrease (severe vs nonsevere)	17 severe, 12 non-severe patients and 10 healthy controls	PBMC	NA	RNA sequencing	Set of lncRNA could discriminate between severe and non-severe COVID-19. Potential immunological functions of the lncRNAs mainly for the observed decrease in total lymphocytes, T cell counts, CD4 + T cell counts and B cell counts and a significant increase in procalcitonin and CRP have been inferred from the clustering of differentially expressed lncRNA.		Cheng J et al., 2021							PCBP1-AS1	Increase	Moazzam-Jazi M et al., 2021
LINC00861	Decrease (severe vs nonsevere)	17 severe, 12 non-severe patients and 10 healthy controls	PBMC	NA	RNA sequencing	Set of lncRNA could discriminate between severe and non-severe COVID-19. Potential immunological functions of the lncRNAs mainly for the observed decrease in total lymphocytes, T cell counts, CD4 + T cell counts and B cell counts and a significant increase in procalcitonin and CRP have been inferred from the clustering of differentially expressed lncRNA.		Cheng J et al., 2021							SGMS1-AS1	Increase	Moazzam-Jazi M et al., 2021
LINC00866	Decrease (severe vs nonsevere)	17 severe, 12 non-severe patients and 10 healthy controls	PBMC	NA	RNA sequencing	Set of lncRNA could discriminate between severe and non-severe COVID-19. Potential immunological functions of the lncRNAs mainly for the observed decrease in total lymphocytes, T cell counts, CD4 + T cell counts and B cell counts and a significant increase in procalcitonin and CRP have been inferred from the clustering of differentially expressed lncRNA.		Cheng J et al., 2021							SNHG14	Increase	Moazzam-Jazi M et al., 2021
LINC00877	Decrease (severe vs nonsevere)	17 severe, 12 non-severe patients and 10 healthy controls	PBMC	NA	RNA sequencing	Set of lncRNA could discriminate between severe and non-severe COVID-19. Potential immunological functions of the lncRNAs mainly for the observed decrease in total lymphocytes, T cell counts, CD4 + T cell counts and B cell counts and a significant increase in procalcitonin and CRP have been inferred from the clustering of differentially expressed lncRNA.		Cheng J et al., 2021							SNHG30	Increase	Moazzam-Jazi M et al., 2021
LINC00891	Decrease (severe vs nonsevere)	17 severe, 12 non-severe patients and 10 healthy controls	PBMC	NA	RNA sequencing	Set of lncRNA could discriminate between severe and non-severe COVID-19. Potential immunological functions of the lncRNAs mainly for the observed decrease in total lymphocytes, T cell counts, CD4 + T cell counts and B cell counts and a significant increase in procalcitonin and CRP have been inferred from the clustering of differentially expressed lncRNA.		Cheng J et al., 2021							SOX21-AS1	Increase	Moazzam-Jazi M et al., 2021
LINC00920	Decrease (severe vs nonsevere)	17 severe, 12 non-severe patients and 10 healthy controls	PBMC	NA	RNA sequencing	Set of lncRNA could discriminate between severe and non-severe COVID-19. Potential immunological functions of the lncRNAs mainly for the observed decrease in total lymphocytes, T cell counts, CD4 + T cell counts and B cell counts and a significant increase in procalcitonin and CRP have been inferred from the clustering of differentially expressed lncRNA.		Cheng J et al., 2021							SPINT1-AS1	Increase	Moazzam-Jazi M et al., 2021
LINC00926	Decrease (severe vs nonsevere)	17 severe, 12 non-severe patients and 10 healthy controls	PBMC	NA	RNA sequencing	Set of lncRNA could discriminate between severe and non-severe COVID-19. Potential immunological functions of the lncRNAs mainly for the observed decrease in total lymphocytes, T cell counts, CD4 + T cell counts and B cell counts and a significant increase in procalcitonin and CRP have been inferred from the clustering of differentially expressed lncRNA.		Cheng J et al., 2021							SRGAP3-AS2	Increase	Moazzam-Jazi M et al., 2021
LINC00940	Decrease (severe vs nonsevere)	17 severe, 12 non-severe patients and 10 healthy controls	PBMC	NA	RNA sequencing	Set of lncRNA could discriminate between severe and non-severe COVID-19. Potential immunological functions of the lncRNAs mainly for the observed decrease in total lymphocytes, T cell counts, CD4 + T cell counts and B cell counts and a significant increase in procalcitonin and CRP have been inferred from the clustering of differentially expressed lncRNA.		Cheng J et al., 2021							SRP14-AS1	Increase	Moazzam-Jazi M et al., 2021
LINC00944	Decrease (severe vs nonsevere)	17 severe, 12 non-severe patients and 10 healthy controls	PBMC	NA	RNA sequencing	Set of lncRNA could discriminate between severe and non-severe COVID-19. Potential immunological functions of the lncRNAs mainly for the observed decrease in total lymphocytes, T cell counts, CD4 + T cell counts and B cell counts and a significant increase in procalcitonin and CRP have been inferred from the clustering of differentially expressed lncRNA.		Cheng J et al., 2021							STARD13-AS	Increase	Moazzam-Jazi M et al., 2021
LINC00954	Decrease (severe vs nonsevere)	17 severe, 12 non-severe patients and 10 healthy controls	PBMC	NA	RNA sequencing	Set of lncRNA could discriminate between severe and non-severe COVID-19. Potential immunological functions of the lncRNAs mainly for the observed decrease in total lymphocytes, T cell counts, CD4 + T cell counts and B cell counts and a significant increase in procalcitonin and CRP have been inferred from the clustering of differentially expressed lncRNA.		Cheng J et al., 2021							THAP9-AS1	Increase	Moazzam-Jazi M et al., 2021
LINC00987	Decrease (severe vs nonsevere)	17 severe, 12 non-severe patients and 10 healthy controls	PBMC	NA	RNA sequencing	Set of lncRNA could discriminate between severe and non-severe COVID-19. Potential immunological functions of the lncRNAs mainly for the observed decrease in total lymphocytes, T cell counts, CD4 + T cell counts and B cell counts and a significant increase in procalcitonin and CRP have been inferred from the clustering of differentially expressed lncRNA.		Cheng J et al., 2021							TMEM44-AS1	Increase	Moazzam-Jazi M et al., 2021
LINC00996	Decrease (severe vs nonsevere)	17 severe, 12 non-severe patients and 10 healthy controls	PBMC	NA	RNA sequencing	Set of lncRNA could discriminate between severe and non-severe COVID-19. Potential immunological functions of the lncRNAs mainly for the observed decrease in total lymphocytes, T cell counts, CD4 + T cell counts and B cell counts and a significant increase in procalcitonin and CRP have been inferred from the clustering of differentially expressed lncRNA.		Cheng J et al., 2021							TRAM2-AS1	Increase	Moazzam-Jazi M et al., 2021
LINC01003	Decrease (severe vs nonsevere)	17 severe, 12 non-severe patients and 10 healthy controls	PBMC	NA	RNA sequencing	Set of lncRNA could discriminate between severe and non-severe COVID-19. Potential immunological functions of the lncRNAs mainly for the observed decrease in total lymphocytes, T cell counts, CD4 + T cell counts and B cell counts and a significant increase in procalcitonin and CRP have been inferred from the clustering of differentially expressed lncRNA.		Cheng J et al., 2021							TRIM52-AS1	Increase	Moazzam-Jazi M et al., 2021
LINC01013	Decrease (severe vs nonsevere)	17 severe, 12 non-severe patients and 10 healthy controls	PBMC	NA	RNA sequencing	Set of lncRNA could discriminate between severe and non-severe COVID-19. Potential immunological functions of the lncRNAs mainly for the observed decrease in total lymphocytes, T cell counts, CD4 + T cell counts and B cell counts and a significant increase in procalcitonin and CRP have been inferred from the clustering of differentially expressed lncRNA.		Cheng J et al., 2021							TUG1	Increase	Moazzam-Jazi M et al., 2021
LINC01089	Decrease (severe vs nonsevere)	17 severe, 12 non-severe patients and 10 healthy controls	PBMC	NA	RNA sequencing	Set of lncRNA could discriminate between severe and non-severe COVID-19. Potential immunological functions of the lncRNAs mainly for the observed decrease in total lymphocytes, T cell counts, CD4 + T cell counts and B cell counts and a significant increase in procalcitonin and CRP have been inferred from the clustering of differentially expressed lncRNA.		Cheng J et al., 2021							UBA6-AS1	Increase	Moazzam-Jazi M et al., 2021
LINC01135	Decrease (severe vs nonsevere)	17 severe, 12 non-severe patients and 10 healthy controls	PBMC	NA	RNA sequencing	Set of lncRNA could discriminate between severe and non-severe COVID-19. Potential immunological functions of the lncRNAs mainly for the observed decrease in total lymphocytes, T cell counts, CD4 + T cell counts and B cell counts and a significant increase in procalcitonin and CRP have been inferred from the clustering of differentially expressed lncRNA.		Cheng J et al., 2021							WARS2-AS1	Increase	Moazzam-Jazi M et al., 2021
LINC01138	Decrease (severe vs nonsevere)	17 severe, 12 non-severe patients and 10 healthy controls	PBMC	NA	RNA sequencing	Set of lncRNA could discriminate between severe and non-severe COVID-19. Potential immunological functions of the lncRNAs mainly for the observed decrease in total lymphocytes, T cell counts, CD4 + T cell counts and B cell counts and a significant increase in procalcitonin and CRP have been inferred from the clustering of differentially expressed lncRNA.		Cheng J et al., 2021							ZEB2-AS1	Increase	Moazzam-Jazi M et al., 2021
LINC01146	Decrease (severe vs nonsevere)	17 severe, 12 non-severe patients and 10 healthy controls	PBMC	NA	RNA sequencing	Set of lncRNA could discriminate between severe and non-severe COVID-19. Potential immunological functions of the lncRNAs mainly for the observed decrease in total lymphocytes, T cell counts, CD4 + T cell counts and B cell counts and a significant increase in procalcitonin and CRP have been inferred from the clustering of differentially expressed lncRNA.		Cheng J et al., 2021							ZFAS1	Increase	Moazzam-Jazi M et al., 2021
LINC01154	Decrease (severe vs nonsevere)	17 severe, 12 non-severe patients and 10 healthy controls	PBMC	NA	RNA sequencing	Set of lncRNA could discriminate between severe and non-severe COVID-19. Potential immunological functions of the lncRNAs mainly for the observed decrease in total lymphocytes, T cell counts, CD4 + T cell counts and B cell counts and a significant increase in procalcitonin and CRP have been inferred from the clustering of differentially expressed lncRNA.		Cheng J et al., 2021							ZNF667-AS1	Increase	Moazzam-Jazi M et al., 2021
LINC01163	Decrease (severe vs nonsevere)	17 severe, 12 non-severe patients and 10 healthy controls	PBMC	NA	RNA sequencing	Set of lncRNA could discriminate between severe and non-severe COVID-19. Potential immunological functions of the lncRNAs mainly for the observed decrease in total lymphocytes, T cell counts, CD4 + T cell counts and B cell counts and a significant increase in procalcitonin and CRP have been inferred from the clustering of differentially expressed lncRNA.		Cheng J et al., 2021							ZSCAN16-AS1	Increase	Moazzam-Jazi M et al., 2021
LINC01184	Decrease (severe vs nonsevere)	17 severe, 12 non-severe patients and 10 healthy controls	PBMC	NA	RNA sequencing	Set of lncRNA could discriminate between severe and non-severe COVID-19. Potential immunological functions of the lncRNAs mainly for the observed decrease in total lymphocytes, T cell counts, CD4 + T cell counts and B cell counts and a significant increase in procalcitonin and CRP have been inferred from the clustering of differentially expressed lncRNA.		Cheng J et al., 2021							RGPD4-AS1	Increase (COVID-ICU vs Non-COVID-ICU)	Shaath H et al., 2021
LINC01215	Decrease (severe vs nonsevere)	17 severe, 12 non-severe patients and 10 healthy controls	PBMC	NA	RNA sequencing	Set of lncRNA could discriminate between severe and non-severe COVID-19. Potential immunological functions of the lncRNAs mainly for the observed decrease in total lymphocytes, T cell counts, CD4 + T cell counts and B cell counts and a significant increase in procalcitonin and CRP have been inferred from the clustering of differentially expressed lncRNA.		Cheng J et al., 2021							DDIT4-AS1	Increase (COVID-non ICU vs Non-COVID-non ICU)	Shaath H et al., 2021
LINC01227	Decrease (severe vs nonsevere)	17 severe, 12 non-severe patients and 10 healthy controls	PBMC	NA	RNA sequencing	Set of lncRNA could discriminate between severe and non-severe COVID-19. Potential immunological functions of the lncRNAs mainly for the observed decrease in total lymphocytes, T cell counts, CD4 + T cell counts and B cell counts and a significant increase in procalcitonin and CRP have been inferred from the clustering of differentially expressed lncRNA.		Cheng J et al., 2021							DTNB-AS1	Increase (COVID-non ICU vs Non-COVID-non ICU)	Shaath H et al., 2021
LINC01237	Decrease (severe vs nonsevere)	17 severe, 12 non-severe patients and 10 healthy controls	PBMC	NA	RNA sequencing	Set of lncRNA could discriminate between severe and non-severe COVID-19. Potential immunological functions of the lncRNAs mainly for the observed decrease in total lymphocytes, T cell counts, CD4 + T cell counts and B cell counts and a significant increase in procalcitonin and CRP have been inferred from the clustering of differentially expressed lncRNA.		Cheng J et al., 2021							GK-AS1	Increase (COVID-non ICU vs Non-COVID-non ICU)	Shaath H et al., 2021
LINC01238	Decrease (severe vs nonsevere)	17 severe, 12 non-severe patients and 10 healthy controls	PBMC	NA	RNA sequencing	Set of lncRNA could discriminate between severe and non-severe COVID-19. Potential immunological functions of the lncRNAs mainly for the observed decrease in total lymphocytes, T cell counts, CD4 + T cell counts and B cell counts and a significant increase in procalcitonin and CRP have been inferred from the clustering of differentially expressed lncRNA.		Cheng J et al., 2021							HCG27	Increase (COVID-non ICU vs Non-COVID-non ICU)	Shaath H et al., 2021
LINC01252	Decrease (severe vs nonsevere)	17 severe, 12 non-severe patients and 10 healthy controls	PBMC	NA	RNA sequencing	Set of lncRNA could discriminate between severe and non-severe COVID-19. Potential immunological functions of the lncRNAs mainly for the observed decrease in total lymphocytes, T cell counts, CD4 + T cell counts and B cell counts and a significant increase in procalcitonin and CRP have been inferred from the clustering of differentially expressed lncRNA.		Cheng J et al., 2021							HCG9	Increase (COVID-non ICU vs Non-COVID-non ICU)	Shaath H et al., 2021
LINC01259	Decrease (severe vs nonsevere)	17 severe, 12 non-severe patients and 10 healthy controls	PBMC	NA	RNA sequencing	Set of lncRNA could discriminate between severe and non-severe COVID-19. Potential immunological functions of the lncRNAs mainly for the observed decrease in total lymphocytes, T cell counts, CD4 + T cell counts and B cell counts and a significant increase in procalcitonin and CRP have been inferred from the clustering of differentially expressed lncRNA.		Cheng J et al., 2021							HCP5	Increase (COVID-non ICU vs Non-COVID-non ICU)	Shaath H et al., 2021
LINC01395	Decrease (severe vs nonsevere)	17 severe, 12 non-severe patients and 10 healthy controls	PBMC	NA	RNA sequencing	Set of lncRNA could discriminate between severe and non-severe COVID-19. Potential immunological functions of the lncRNAs mainly for the observed decrease in total lymphocytes, T cell counts, CD4 + T cell counts and B cell counts and a significant increase in procalcitonin and CRP have been inferred from the clustering of differentially expressed lncRNA.		Cheng J et al., 2021							LINC01410	Increase (COVID-non ICU vs Non-COVID-non ICU)	Shaath H et al., 2021
LINC01402	Decrease (severe vs nonsevere)	17 severe, 12 non-severe patients and 10 healthy controls	PBMC	NA	RNA sequencing	Set of lncRNA could discriminate between severe and non-severe COVID-19. Potential immunological functions of the lncRNAs mainly for the observed decrease in total lymphocytes, T cell counts, CD4 + T cell counts and B cell counts and a significant increase in procalcitonin and CRP have been inferred from the clustering of differentially expressed lncRNA.		Cheng J et al., 2021							LINC02284	Increase (COVID-non ICU vs Non-COVID-non ICU)	Shaath H et al., 2021
LINC01409	Decrease (severe vs nonsevere)	17 severe, 12 non-severe patients and 10 healthy controls	PBMC	NA	RNA sequencing	Set of lncRNA could discriminate between severe and non-severe COVID-19. Potential immunological functions of the lncRNAs mainly for the observed decrease in total lymphocytes, T cell counts, CD4 + T cell counts and B cell counts and a significant increase in procalcitonin and CRP have been inferred from the clustering of differentially expressed lncRNA.		Cheng J et al., 2021							LINC02705	Increase (COVID-non ICU vs Non-COVID-non ICU)	Shaath H et al., 2021
LINC01422	Decrease (severe vs nonsevere)	17 severe, 12 non-severe patients and 10 healthy controls	PBMC	NA	RNA sequencing	Set of lncRNA could discriminate between severe and non-severe COVID-19. Potential immunological functions of the lncRNAs mainly for the observed decrease in total lymphocytes, T cell counts, CD4 + T cell counts and B cell counts and a significant increase in procalcitonin and CRP have been inferred from the clustering of differentially expressed lncRNA.		Cheng J et al., 2021							LINC02863	Increase (COVID-non ICU vs Non-COVID-non ICU)	Shaath H et al., 2021
LINC01431	Decrease (severe vs nonsevere)	17 severe, 12 non-severe patients and 10 healthy controls	PBMC	NA	RNA sequencing	Set of lncRNA could discriminate between severe and non-severe COVID-19. Potential immunological functions of the lncRNAs mainly for the observed decrease in total lymphocytes, T cell counts, CD4 + T cell counts and B cell counts and a significant increase in procalcitonin and CRP have been inferred from the clustering of differentially expressed lncRNA.		Cheng J et al., 2021							NRIR	Increase (COVID-non ICU vs Non-COVID-non ICU)	Shaath H et al., 2021
LINC01473	Decrease (severe vs nonsevere)	17 severe, 12 non-severe patients and 10 healthy controls	PBMC	NA	RNA sequencing	Set of lncRNA could discriminate between severe and non-severe COVID-19. Potential immunological functions of the lncRNAs mainly for the observed decrease in total lymphocytes, T cell counts, CD4 + T cell counts and B cell counts and a significant increase in procalcitonin and CRP have been inferred from the clustering of differentially expressed lncRNA.		Cheng J et al., 2021							RNF185-AS1	Increase (COVID-non ICU vs Non-COVID-non ICU)	Shaath H et al., 2021
LINC01505	Decrease (severe vs nonsevere)	17 severe, 12 non-severe patients and 10 healthy controls	PBMC	NA	RNA sequencing	Set of lncRNA could discriminate between severe and non-severe COVID-19. Potential immunological functions of the lncRNAs mainly for the observed decrease in total lymphocytes, T cell counts, CD4 + T cell counts and B cell counts and a significant increase in procalcitonin and CRP have been inferred from the clustering of differentially expressed lncRNA.		Cheng J et al., 2021							SCAT8	Increase (COVID-non ICU vs Non-COVID-non ICU)	Shaath H et al., 2021
LINC01534	Decrease (severe vs nonsevere)	17 severe, 12 non-severe patients and 10 healthy controls	PBMC	NA	RNA sequencing	Set of lncRNA could discriminate between severe and non-severe COVID-19. Potential immunological functions of the lncRNAs mainly for the observed decrease in total lymphocytes, T cell counts, CD4 + T cell counts and B cell counts and a significant increase in procalcitonin and CRP have been inferred from the clustering of differentially expressed lncRNA.		Cheng J et al., 2021							TTN-AS1	Increase (COVID-non ICU vs Non-COVID-non ICU)	Shaath H et al., 2021
LINC01550	Decrease (severe vs nonsevere)	17 severe, 12 non-severe patients and 10 healthy controls	PBMC	NA	RNA sequencing	Set of lncRNA could discriminate between severe and non-severe COVID-19. Potential immunological functions of the lncRNAs mainly for the observed decrease in total lymphocytes, T cell counts, CD4 + T cell counts and B cell counts and a significant increase in procalcitonin and CRP have been inferred from the clustering of differentially expressed lncRNA.		Cheng J et al., 2021							LINC00278	Increase (severe vs non severe)	Cheng J et al., 2021
LINC01569	Decrease (severe vs nonsevere)	17 severe, 12 non-severe patients and 10 healthy controls	PBMC	NA	RNA sequencing	Set of lncRNA could discriminate between severe and non-severe COVID-19. Potential immunological functions of the lncRNAs mainly for the observed decrease in total lymphocytes, T cell counts, CD4 + T cell counts and B cell counts and a significant increase in procalcitonin and CRP have been inferred from the clustering of differentially expressed lncRNA.		Cheng J et al., 2021							LINC00671	Increase (severe vs non severe)	Cheng J et al., 2021
LINC01572	Decrease (severe vs nonsevere)	17 severe, 12 non-severe patients and 10 healthy controls	PBMC	NA	RNA sequencing	Set of lncRNA could discriminate between severe and non-severe COVID-19. Potential immunological functions of the lncRNAs mainly for the observed decrease in total lymphocytes, T cell counts, CD4 + T cell counts and B cell counts and a significant increase in procalcitonin and CRP have been inferred from the clustering of differentially expressed lncRNA.		Cheng J et al., 2021							LINC01988	Increase (severe vs non severe)	Cheng J et al., 2021
LINC01578	Decrease (severe vs nonsevere)	17 severe, 12 non-severe patients and 10 healthy controls	PBMC	NA	RNA sequencing	Set of lncRNA could discriminate between severe and non-severe COVID-19. Potential immunological functions of the lncRNAs mainly for the observed decrease in total lymphocytes, T cell counts, CD4 + T cell counts and B cell counts and a significant increase in procalcitonin and CRP have been inferred from the clustering of differentially expressed lncRNA.		Cheng J et al., 2021							MIR3945HG	Increase (severe vs non severe)	Cheng J et al., 2021
LINC01588	Decrease (severe vs nonsevere)	17 severe, 12 non-severe patients and 10 healthy controls	PBMC	NA	RNA sequencing	Set of lncRNA could discriminate between severe and non-severe COVID-19. Potential immunological functions of the lncRNAs mainly for the observed decrease in total lymphocytes, T cell counts, CD4 + T cell counts and B cell counts and a significant increase in procalcitonin and CRP have been inferred from the clustering of differentially expressed lncRNA.		Cheng J et al., 2021							HCG11	Increased	Laha S et al., 2021
LINC01619	Decrease (severe vs nonsevere)	17 severe, 12 non-severe patients and 10 healthy controls	PBMC	NA	RNA sequencing	Set of lncRNA could discriminate between severe and non-severe COVID-19. Potential immunological functions of the lncRNAs mainly for the observed decrease in total lymphocytes, T cell counts, CD4 + T cell counts and B cell counts and a significant increase in procalcitonin and CRP have been inferred from the clustering of differentially expressed lncRNA.		Cheng J et al., 2021							HIF1A-AS2	Increased	Laha S et al., 2021
LINC01624	Decrease (severe vs nonsevere)	17 severe, 12 non-severe patients and 10 healthy controls	PBMC	NA	RNA sequencing	Set of lncRNA could discriminate between severe and non-severe COVID-19. Potential immunological functions of the lncRNAs mainly for the observed decrease in total lymphocytes, T cell counts, CD4 + T cell counts and B cell counts and a significant increase in procalcitonin and CRP have been inferred from the clustering of differentially expressed lncRNA.		Cheng J et al., 2021							INHBA-AS1	Increased	Turjya RR et al., 2020
LINC01637	Decrease (severe vs nonsevere)	17 severe, 12 non-severe patients and 10 healthy controls	PBMC	NA	RNA sequencing	Set of lncRNA could discriminate between severe and non-severe COVID-19. Potential immunological functions of the lncRNAs mainly for the observed decrease in total lymphocytes, T cell counts, CD4 + T cell counts and B cell counts and a significant increase in procalcitonin and CRP have been inferred from the clustering of differentially expressed lncRNA.		Cheng J et al., 2021							LINC00312	Increased	Laha S et al., 2021
LINC01644	Decrease (severe vs nonsevere)	17 severe, 12 non-severe patients and 10 healthy controls	PBMC	NA	RNA sequencing	Set of lncRNA could discriminate between severe and non-severe COVID-19. Potential immunological functions of the lncRNAs mainly for the observed decrease in total lymphocytes, T cell counts, CD4 + T cell counts and B cell counts and a significant increase in procalcitonin and CRP have been inferred from the clustering of differentially expressed lncRNA.		Cheng J et al., 2021							LINC00473	Increased	Laha S et al., 2021
LINC01678	Decrease (severe vs nonsevere)	17 severe, 12 non-severe patients and 10 healthy controls	PBMC	NA	RNA sequencing	Set of lncRNA could discriminate between severe and non-severe COVID-19. Potential immunological functions of the lncRNAs mainly for the observed decrease in total lymphocytes, T cell counts, CD4 + T cell counts and B cell counts and a significant increase in procalcitonin and CRP have been inferred from the clustering of differentially expressed lncRNA.		Cheng J et al., 2021							LINC00605	Increased	Laha S et al., 2021
LINC01684	Decrease (severe vs nonsevere)	17 severe, 12 non-severe patients and 10 healthy controls	PBMC	NA	RNA sequencing	Set of lncRNA could discriminate between severe and non-severe COVID-19. Potential immunological functions of the lncRNAs mainly for the observed decrease in total lymphocytes, T cell counts, CD4 + T cell counts and B cell counts and a significant increase in procalcitonin and CRP have been inferred from the clustering of differentially expressed lncRNA.		Cheng J et al., 2021							LINC00842	Increased	Laha S et al., 2021
LINC01703	Decrease (severe vs nonsevere)	17 severe, 12 non-severe patients and 10 healthy controls	PBMC	NA	RNA sequencing	Set of lncRNA could discriminate between severe and non-severe COVID-19. Potential immunological functions of the lncRNAs mainly for the observed decrease in total lymphocytes, T cell counts, CD4 + T cell counts and B cell counts and a significant increase in procalcitonin and CRP have been inferred from the clustering of differentially expressed lncRNA.		Cheng J et al., 2021							LINC02015	Increased	Turjya RR et al., 2020
LINC01715	Decrease (severe vs nonsevere)	17 severe, 12 non-severe patients and 10 healthy controls	PBMC	NA	RNA sequencing	Set of lncRNA could discriminate between severe and non-severe COVID-19. Potential immunological functions of the lncRNAs mainly for the observed decrease in total lymphocytes, T cell counts, CD4 + T cell counts and B cell counts and a significant increase in procalcitonin and CRP have been inferred from the clustering of differentially expressed lncRNA.		Cheng J et al., 2021							MEG9	Increased	Laha S et al., 2021
LINC01727	Decrease (severe vs nonsevere)	17 severe, 12 non-severe patients and 10 healthy controls	PBMC	NA	RNA sequencing	Set of lncRNA could discriminate between severe and non-severe COVID-19. Potential immunological functions of the lncRNAs mainly for the observed decrease in total lymphocytes, T cell counts, CD4 + T cell counts and B cell counts and a significant increase in procalcitonin and CRP have been inferred from the clustering of differentially expressed lncRNA.		Cheng J et al., 2021							RMRP	Increased	Laha S et al., 2021
LINC01730	Decrease (severe vs nonsevere)	17 severe, 12 non-severe patients and 10 healthy controls	PBMC	NA	RNA sequencing	Set of lncRNA could discriminate between severe and non-severe COVID-19. Potential immunological functions of the lncRNAs mainly for the observed decrease in total lymphocytes, T cell counts, CD4 + T cell counts and B cell counts and a significant increase in procalcitonin and CRP have been inferred from the clustering of differentially expressed lncRNA.		Cheng J et al., 2021							TERC	Increased	Laha S et al., 2021
LINC01732	Decrease (severe vs nonsevere)	17 severe, 12 non-severe patients and 10 healthy controls	PBMC	NA	RNA sequencing	Set of lncRNA could discriminate between severe and non-severe COVID-19. Potential immunological functions of the lncRNAs mainly for the observed decrease in total lymphocytes, T cell counts, CD4 + T cell counts and B cell counts and a significant increase in procalcitonin and CRP have been inferred from the clustering of differentially expressed lncRNA.		Cheng J et al., 2021
LINC01772	Decrease (severe vs nonsevere)	17 severe, 12 non-severe patients and 10 healthy controls	PBMC	NA	RNA sequencing	Set of lncRNA could discriminate between severe and non-severe COVID-19. Potential immunological functions of the lncRNAs mainly for the observed decrease in total lymphocytes, T cell counts, CD4 + T cell counts and B cell counts and a significant increase in procalcitonin and CRP have been inferred from the clustering of differentially expressed lncRNA.		Cheng J et al., 2021
LINC01786	Decrease (severe vs nonsevere)	17 severe, 12 non-severe patients and 10 healthy controls	PBMC	NA	RNA sequencing	Set of lncRNA could discriminate between severe and non-severe COVID-19. Potential immunological functions of the lncRNAs mainly for the observed decrease in total lymphocytes, T cell counts, CD4 + T cell counts and B cell counts and a significant increase in procalcitonin and CRP have been inferred from the clustering of differentially expressed lncRNA.		Cheng J et al., 2021
LINC01801	Decrease (severe vs nonsevere)	17 severe, 12 non-severe patients and 10 healthy controls	PBMC	NA	RNA sequencing	Set of lncRNA could discriminate between severe and non-severe COVID-19. Potential immunological functions of the lncRNAs mainly for the observed decrease in total lymphocytes, T cell counts, CD4 + T cell counts and B cell counts and a significant increase in procalcitonin and CRP have been inferred from the clustering of differentially expressed lncRNA.		Cheng J et al., 2021
LINC01806	Decrease (severe vs nonsevere)	17 severe, 12 non-severe patients and 10 healthy controls	PBMC	NA	RNA sequencing	Set of lncRNA could discriminate between severe and non-severe COVID-19. Potential immunological functions of the lncRNAs mainly for the observed decrease in total lymphocytes, T cell counts, CD4 + T cell counts and B cell counts and a significant increase in procalcitonin and CRP have been inferred from the clustering of differentially expressed lncRNA.		Cheng J et al., 2021
LINC01857	Decrease (severe vs nonsevere)	17 severe, 12 non-severe patients and 10 healthy controls	PBMC	NA	RNA sequencing	Set of lncRNA could discriminate between severe and non-severe COVID-19. Potential immunological functions of the lncRNAs mainly for the observed decrease in total lymphocytes, T cell counts, CD4 + T cell counts and B cell counts and a significant increase in procalcitonin and CRP have been inferred from the clustering of differentially expressed lncRNA.		Cheng J et al., 2021
LINC01871	Decrease (severe vs nonsevere)	17 severe, 12 non-severe patients and 10 healthy controls	PBMC	NA	RNA sequencing	Set of lncRNA could discriminate between severe and non-severe COVID-19. Potential immunological functions of the lncRNAs mainly for the observed decrease in total lymphocytes, T cell counts, CD4 + T cell counts and B cell counts and a significant increase in procalcitonin and CRP have been inferred from the clustering of differentially expressed lncRNA.		Cheng J et al., 2021
LINC01876	Decrease (severe vs nonsevere)	17 severe, 12 non-severe patients and 10 healthy controls	PBMC	NA	RNA sequencing	Set of lncRNA could discriminate between severe and non-severe COVID-19. Potential immunological functions of the lncRNAs mainly for the observed decrease in total lymphocytes, T cell counts, CD4 + T cell counts and B cell counts and a significant increase in procalcitonin and CRP have been inferred from the clustering of differentially expressed lncRNA.		Cheng J et al., 2021
LINC01891	Decrease (severe vs nonsevere)	17 severe, 12 non-severe patients and 10 healthy controls	PBMC	NA	RNA sequencing	Set of lncRNA could discriminate between severe and non-severe COVID-19. Potential immunological functions of the lncRNAs mainly for the observed decrease in total lymphocytes, T cell counts, CD4 + T cell counts and B cell counts and a significant increase in procalcitonin and CRP have been inferred from the clustering of differentially expressed lncRNA.		Cheng J et al., 2021
LINC01934	Decrease (severe vs nonsevere)	17 severe, 12 non-severe patients and 10 healthy controls	PBMC	NA	RNA sequencing	Set of lncRNA could discriminate between severe and non-severe COVID-19. Potential immunological functions of the lncRNAs mainly for the observed decrease in total lymphocytes, T cell counts, CD4 + T cell counts and B cell counts and a significant increase in procalcitonin and CRP have been inferred from the clustering of differentially expressed lncRNA.		Cheng J et al., 2021
LINC01973	Decrease (severe vs nonsevere)	17 severe, 12 non-severe patients and 10 healthy controls	PBMC	NA	RNA sequencing	Set of lncRNA could discriminate between severe and non-severe COVID-19. Potential immunological functions of the lncRNAs mainly for the observed decrease in total lymphocytes, T cell counts, CD4 + T cell counts and B cell counts and a significant increase in procalcitonin and CRP have been inferred from the clustering of differentially expressed lncRNA.		Cheng J et al., 2021
LINC02012	Decrease (severe vs nonsevere)	17 severe, 12 non-severe patients and 10 healthy controls	PBMC	NA	RNA sequencing	Set of lncRNA could discriminate between severe and non-severe COVID-19. Potential immunological functions of the lncRNAs mainly for the observed decrease in total lymphocytes, T cell counts, CD4 + T cell counts and B cell counts and a significant increase in procalcitonin and CRP have been inferred from the clustering of differentially expressed lncRNA.		Cheng J et al., 2021
LINC02018	Decrease (severe vs nonsevere)	17 severe, 12 non-severe patients and 10 healthy controls	PBMC	NA	RNA sequencing	Set of lncRNA could discriminate between severe and non-severe COVID-19. Potential immunological functions of the lncRNAs mainly for the observed decrease in total lymphocytes, T cell counts, CD4 + T cell counts and B cell counts and a significant increase in procalcitonin and CRP have been inferred from the clustering of differentially expressed lncRNA.		Cheng J et al., 2021
LINC02019	Decrease (severe vs nonsevere)	17 severe, 12 non-severe patients and 10 healthy controls	PBMC	NA	RNA sequencing	Set of lncRNA could discriminate between severe and non-severe COVID-19. Potential immunological functions of the lncRNAs mainly for the observed decrease in total lymphocytes, T cell counts, CD4 + T cell counts and B cell counts and a significant increase in procalcitonin and CRP have been inferred from the clustering of differentially expressed lncRNA.		Cheng J et al., 2021
LINC02033	Decrease (severe vs nonsevere)	17 severe, 12 non-severe patients and 10 healthy controls	PBMC	NA	RNA sequencing	Set of lncRNA could discriminate between severe and non-severe COVID-19. Potential immunological functions of the lncRNAs mainly for the observed decrease in total lymphocytes, T cell counts, CD4 + T cell counts and B cell counts and a significant increase in procalcitonin and CRP have been inferred from the clustering of differentially expressed lncRNA.		Cheng J et al., 2021
LINC02084	Decrease (severe vs nonsevere)	17 severe, 12 non-severe patients and 10 healthy controls	PBMC	NA	RNA sequencing	Set of lncRNA could discriminate between severe and non-severe COVID-19. Potential immunological functions of the lncRNAs mainly for the observed decrease in total lymphocytes, T cell counts, CD4 + T cell counts and B cell counts and a significant increase in procalcitonin and CRP have been inferred from the clustering of differentially expressed lncRNA.		Cheng J et al., 2021
LINC02085	Decrease (severe vs nonsevere)	17 severe, 12 non-severe patients and 10 healthy controls	PBMC	NA	RNA sequencing	Set of lncRNA could discriminate between severe and non-severe COVID-19. Potential immunological functions of the lncRNAs mainly for the observed decrease in total lymphocytes, T cell counts, CD4 + T cell counts and B cell counts and a significant increase in procalcitonin and CRP have been inferred from the clustering of differentially expressed lncRNA.		Cheng J et al., 2021
LINC02086	Decrease (severe vs nonsevere)	17 severe, 12 non-severe patients and 10 healthy controls	PBMC	NA	RNA sequencing	Set of lncRNA could discriminate between severe and non-severe COVID-19. Potential immunological functions of the lncRNAs mainly for the observed decrease in total lymphocytes, T cell counts, CD4 + T cell counts and B cell counts and a significant increase in procalcitonin and CRP have been inferred from the clustering of differentially expressed lncRNA.		Cheng J et al., 2021
LINC02100	Decrease (severe vs nonsevere)	17 severe, 12 non-severe patients and 10 healthy controls	PBMC	NA	RNA sequencing	Set of lncRNA could discriminate between severe and non-severe COVID-19. Potential immunological functions of the lncRNAs mainly for the observed decrease in total lymphocytes, T cell counts, CD4 + T cell counts and B cell counts and a significant increase in procalcitonin and CRP have been inferred from the clustering of differentially expressed lncRNA.		Cheng J et al., 2021
LINC02145	Decrease (severe vs nonsevere)	17 severe, 12 non-severe patients and 10 healthy controls	PBMC	NA	RNA sequencing	Set of lncRNA could discriminate between severe and non-severe COVID-19. Potential immunological functions of the lncRNAs mainly for the observed decrease in total lymphocytes, T cell counts, CD4 + T cell counts and B cell counts and a significant increase in procalcitonin and CRP have been inferred from the clustering of differentially expressed lncRNA.		Cheng J et al., 2021
LINC02175	Decrease (severe vs nonsevere)	17 severe, 12 non-severe patients and 10 healthy controls	PBMC	NA	RNA sequencing	Set of lncRNA could discriminate between severe and non-severe COVID-19. Potential immunological functions of the lncRNAs mainly for the observed decrease in total lymphocytes, T cell counts, CD4 + T cell counts and B cell counts and a significant increase in procalcitonin and CRP have been inferred from the clustering of differentially expressed lncRNA.		Cheng J et al., 2021
LINC02205	Decrease (severe vs nonsevere)	17 severe, 12 non-severe patients and 10 healthy controls	PBMC	NA	RNA sequencing	Set of lncRNA could discriminate between severe and non-severe COVID-19. Potential immunological functions of the lncRNAs mainly for the observed decrease in total lymphocytes, T cell counts, CD4 + T cell counts and B cell counts and a significant increase in procalcitonin and CRP have been inferred from the clustering of differentially expressed lncRNA.		Cheng J et al., 2021
LINC02256	Decrease (severe vs nonsevere)	17 severe, 12 non-severe patients and 10 healthy controls	PBMC	NA	RNA sequencing	Set of lncRNA could discriminate between severe and non-severe COVID-19. Potential immunological functions of the lncRNAs mainly for the observed decrease in total lymphocytes, T cell counts, CD4 + T cell counts and B cell counts and a significant increase in procalcitonin and CRP have been inferred from the clustering of differentially expressed lncRNA.		Cheng J et al., 2021
LINC02257	Decrease (severe vs nonsevere)	17 severe, 12 non-severe patients and 10 healthy controls	PBMC	NA	RNA sequencing	Set of lncRNA could discriminate between severe and non-severe COVID-19. Potential immunological functions of the lncRNAs mainly for the observed decrease in total lymphocytes, T cell counts, CD4 + T cell counts and B cell counts and a significant increase in procalcitonin and CRP have been inferred from the clustering of differentially expressed lncRNA.		Cheng J et al., 2021
LINC02273	Decrease (severe vs nonsevere)	17 severe, 12 non-severe patients and 10 healthy controls	PBMC	NA	RNA sequencing	Set of lncRNA could discriminate between severe and non-severe COVID-19. Potential immunological functions of the lncRNAs mainly for the observed decrease in total lymphocytes, T cell counts, CD4 + T cell counts and B cell counts and a significant increase in procalcitonin and CRP have been inferred from the clustering of differentially expressed lncRNA.		Cheng J et al., 2021
LINC02287	Decrease (severe vs nonsevere)	17 severe, 12 non-severe patients and 10 healthy controls	PBMC	NA	RNA sequencing	Set of lncRNA could discriminate between severe and non-severe COVID-19. Potential immunological functions of the lncRNAs mainly for the observed decrease in total lymphocytes, T cell counts, CD4 + T cell counts and B cell counts and a significant increase in procalcitonin and CRP have been inferred from the clustering of differentially expressed lncRNA.		Cheng J et al., 2021
LINC02295	Decrease (severe vs nonsevere)	17 severe, 12 non-severe patients and 10 healthy controls	PBMC	NA	RNA sequencing	Set of lncRNA could discriminate between severe and non-severe COVID-19. Potential immunological functions of the lncRNAs mainly for the observed decrease in total lymphocytes, T cell counts, CD4 + T cell counts and B cell counts and a significant increase in procalcitonin and CRP have been inferred from the clustering of differentially expressed lncRNA.		Cheng J et al., 2021
LINC02298	Decrease (severe vs nonsevere)	17 severe, 12 non-severe patients and 10 healthy controls	PBMC	NA	RNA sequencing	Set of lncRNA could discriminate between severe and non-severe COVID-19. Potential immunological functions of the lncRNAs mainly for the observed decrease in total lymphocytes, T cell counts, CD4 + T cell counts and B cell counts and a significant increase in procalcitonin and CRP have been inferred from the clustering of differentially expressed lncRNA.		Cheng J et al., 2021
LINC02325	Decrease (severe vs nonsevere)	17 severe, 12 non-severe patients and 10 healthy controls	PBMC	NA	RNA sequencing	Set of lncRNA could discriminate between severe and non-severe COVID-19. Potential immunological functions of the lncRNAs mainly for the observed decrease in total lymphocytes, T cell counts, CD4 + T cell counts and B cell counts and a significant increase in procalcitonin and CRP have been inferred from the clustering of differentially expressed lncRNA.		Cheng J et al., 2021
LINC02328	Decrease (severe vs nonsevere)	17 severe, 12 non-severe patients and 10 healthy controls	PBMC	NA	RNA sequencing	Set of lncRNA could discriminate between severe and non-severe COVID-19. Potential immunological functions of the lncRNAs mainly for the observed decrease in total lymphocytes, T cell counts, CD4 + T cell counts and B cell counts and a significant increase in procalcitonin and CRP have been inferred from the clustering of differentially expressed lncRNA.		Cheng J et al., 2021
LINC02361	Decrease (severe vs nonsevere)	17 severe, 12 non-severe patients and 10 healthy controls	PBMC	NA	RNA sequencing	Set of lncRNA could discriminate between severe and non-severe COVID-19. Potential immunological functions of the lncRNAs mainly for the observed decrease in total lymphocytes, T cell counts, CD4 + T cell counts and B cell counts and a significant increase in procalcitonin and CRP have been inferred from the clustering of differentially expressed lncRNA.		Cheng J et al., 2021
LINC02384	Decrease (severe vs nonsevere)	17 severe, 12 non-severe patients and 10 healthy controls	PBMC	NA	RNA sequencing	Set of lncRNA could discriminate between severe and non-severe COVID-19. Potential immunological functions of the lncRNAs mainly for the observed decrease in total lymphocytes, T cell counts, CD4 + T cell counts and B cell counts and a significant increase in procalcitonin and CRP have been inferred from the clustering of differentially expressed lncRNA.		Cheng J et al., 2021
LINC02390	Decrease (severe vs nonsevere)	17 severe, 12 non-severe patients and 10 healthy controls	PBMC	NA	RNA sequencing	Set of lncRNA could discriminate between severe and non-severe COVID-19. Potential immunological functions of the lncRNAs mainly for the observed decrease in total lymphocytes, T cell counts, CD4 + T cell counts and B cell counts and a significant increase in procalcitonin and CRP have been inferred from the clustering of differentially expressed lncRNA.		Cheng J et al., 2021
LINC02391	Decrease (severe vs nonsevere)	17 severe, 12 non-severe patients and 10 healthy controls	PBMC	NA	RNA sequencing	Set of lncRNA could discriminate between severe and non-severe COVID-19. Potential immunological functions of the lncRNAs mainly for the observed decrease in total lymphocytes, T cell counts, CD4 + T cell counts and B cell counts and a significant increase in procalcitonin and CRP have been inferred from the clustering of differentially expressed lncRNA.		Cheng J et al., 2021
LINC02397	Decrease (severe vs nonsevere)	17 severe, 12 non-severe patients and 10 healthy controls	PBMC	NA	RNA sequencing	Set of lncRNA could discriminate between severe and non-severe COVID-19. Potential immunological functions of the lncRNAs mainly for the observed decrease in total lymphocytes, T cell counts, CD4 + T cell counts and B cell counts and a significant increase in procalcitonin and CRP have been inferred from the clustering of differentially expressed lncRNA.		Cheng J et al., 2021
LINC02432	Decrease (severe vs nonsevere)	17 severe, 12 non-severe patients and 10 healthy controls	PBMC	NA	RNA sequencing	Set of lncRNA could discriminate between severe and non-severe COVID-19. Potential immunological functions of the lncRNAs mainly for the observed decrease in total lymphocytes, T cell counts, CD4 + T cell counts and B cell counts and a significant increase in procalcitonin and CRP have been inferred from the clustering of differentially expressed lncRNA.		Cheng J et al., 2021
LINC02446	Decrease (severe vs nonsevere)	17 severe, 12 non-severe patients and 10 healthy controls	PBMC	NA	RNA sequencing	Set of lncRNA could discriminate between severe and non-severe COVID-19. Potential immunological functions of the lncRNAs mainly for the observed decrease in total lymphocytes, T cell counts, CD4 + T cell counts and B cell counts and a significant increase in procalcitonin and CRP have been inferred from the clustering of differentially expressed lncRNA.		Cheng J et al., 2021
LINC02449	Decrease (severe vs nonsevere)	17 severe, 12 non-severe patients and 10 healthy controls	PBMC	NA	RNA sequencing	Set of lncRNA could discriminate between severe and non-severe COVID-19. Potential immunological functions of the lncRNAs mainly for the observed decrease in total lymphocytes, T cell counts, CD4 + T cell counts and B cell counts and a significant increase in procalcitonin and CRP have been inferred from the clustering of differentially expressed lncRNA.		Cheng J et al., 2021
LINC02470	Decrease (severe vs nonsevere)	17 severe, 12 non-severe patients and 10 healthy controls	PBMC	NA	RNA sequencing	Set of lncRNA could discriminate between severe and non-severe COVID-19. Potential immunological functions of the lncRNAs mainly for the observed decrease in total lymphocytes, T cell counts, CD4 + T cell counts and B cell counts and a significant increase in procalcitonin and CRP have been inferred from the clustering of differentially expressed lncRNA.		Cheng J et al., 2021
LINC02481	Decrease (severe vs nonsevere)	17 severe, 12 non-severe patients and 10 healthy controls	PBMC	NA	RNA sequencing	Set of lncRNA could discriminate between severe and non-severe COVID-19. Potential immunological functions of the lncRNAs mainly for the observed decrease in total lymphocytes, T cell counts, CD4 + T cell counts and B cell counts and a significant increase in procalcitonin and CRP have been inferred from the clustering of differentially expressed lncRNA.		Cheng J et al., 2021
LINC02520	Decrease (severe vs nonsevere)	17 severe, 12 non-severe patients and 10 healthy controls	PBMC	NA	RNA sequencing	Set of lncRNA could discriminate between severe and non-severe COVID-19. Potential immunological functions of the lncRNAs mainly for the observed decrease in total lymphocytes, T cell counts, CD4 + T cell counts and B cell counts and a significant increase in procalcitonin and CRP have been inferred from the clustering of differentially expressed lncRNA.		Cheng J et al., 2021
LINC02551	Decrease (severe vs nonsevere)	17 severe, 12 non-severe patients and 10 healthy controls	PBMC	NA	RNA sequencing	Set of lncRNA could discriminate between severe and non-severe COVID-19. Potential immunological functions of the lncRNAs mainly for the observed decrease in total lymphocytes, T cell counts, CD4 + T cell counts and B cell counts and a significant increase in procalcitonin and CRP have been inferred from the clustering of differentially expressed lncRNA.		Cheng J et al., 2021
LINC02556	Decrease (severe vs nonsevere)	17 severe, 12 non-severe patients and 10 healthy controls	PBMC	NA	RNA sequencing	Set of lncRNA could discriminate between severe and non-severe COVID-19. Potential immunological functions of the lncRNAs mainly for the observed decrease in total lymphocytes, T cell counts, CD4 + T cell counts and B cell counts and a significant increase in procalcitonin and CRP have been inferred from the clustering of differentially expressed lncRNA.		Cheng J et al., 2021
LINC02561	Decrease (severe vs nonsevere)	17 severe, 12 non-severe patients and 10 healthy controls	PBMC	NA	RNA sequencing	Set of lncRNA could discriminate between severe and non-severe COVID-19. Potential immunological functions of the lncRNAs mainly for the observed decrease in total lymphocytes, T cell counts, CD4 + T cell counts and B cell counts and a significant increase in procalcitonin and CRP have been inferred from the clustering of differentially expressed lncRNA.		Cheng J et al., 2021
LINC02574	Decrease (severe vs nonsevere)	17 severe, 12 non-severe patients and 10 healthy controls	PBMC	NA	RNA sequencing	Set of lncRNA could discriminate between severe and non-severe COVID-19. Potential immunological functions of the lncRNAs mainly for the observed decrease in total lymphocytes, T cell counts, CD4 + T cell counts and B cell counts and a significant increase in procalcitonin and CRP have been inferred from the clustering of differentially expressed lncRNA.		Cheng J et al., 2021
LINC02580	Decrease (severe vs nonsevere)	17 severe, 12 non-severe patients and 10 healthy controls	PBMC	NA	RNA sequencing	Set of lncRNA could discriminate between severe and non-severe COVID-19. Potential immunological functions of the lncRNAs mainly for the observed decrease in total lymphocytes, T cell counts, CD4 + T cell counts and B cell counts and a significant increase in procalcitonin and CRP have been inferred from the clustering of differentially expressed lncRNA.		Cheng J et al., 2021
LINC02591	Decrease (severe vs nonsevere)	17 severe, 12 non-severe patients and 10 healthy controls	PBMC	NA	RNA sequencing	Set of lncRNA could discriminate between severe and non-severe COVID-19. Potential immunological functions of the lncRNAs mainly for the observed decrease in total lymphocytes, T cell counts, CD4 + T cell counts and B cell counts and a significant increase in procalcitonin and CRP have been inferred from the clustering of differentially expressed lncRNA.		Cheng J et al., 2021
LINC02595	Decrease (severe vs nonsevere)	17 severe, 12 non-severe patients and 10 healthy controls	PBMC	NA	RNA sequencing	Set of lncRNA could discriminate between severe and non-severe COVID-19. Potential immunological functions of the lncRNAs mainly for the observed decrease in total lymphocytes, T cell counts, CD4 + T cell counts and B cell counts and a significant increase in procalcitonin and CRP have been inferred from the clustering of differentially expressed lncRNA.		Cheng J et al., 2021
LINC02598	Decrease (severe vs nonsevere)	17 severe, 12 non-severe patients and 10 healthy controls	PBMC	NA	RNA sequencing	Set of lncRNA could discriminate between severe and non-severe COVID-19. Potential immunological functions of the lncRNAs mainly for the observed decrease in total lymphocytes, T cell counts, CD4 + T cell counts and B cell counts and a significant increase in procalcitonin and CRP have been inferred from the clustering of differentially expressed lncRNA.		Cheng J et al., 2021
LINC02604	Decrease (severe vs nonsevere)	17 severe, 12 non-severe patients and 10 healthy controls	PBMC	NA	RNA sequencing	Set of lncRNA could discriminate between severe and non-severe COVID-19. Potential immunological functions of the lncRNAs mainly for the observed decrease in total lymphocytes, T cell counts, CD4 + T cell counts and B cell counts and a significant increase in procalcitonin and CRP have been inferred from the clustering of differentially expressed lncRNA.		Cheng J et al., 2021
LINC02611	Decrease (severe vs nonsevere)	17 severe, 12 non-severe patients and 10 healthy controls	PBMC	NA	RNA sequencing	Set of lncRNA could discriminate between severe and non-severe COVID-19. Potential immunological functions of the lncRNAs mainly for the observed decrease in total lymphocytes, T cell counts, CD4 + T cell counts and B cell counts and a significant increase in procalcitonin and CRP have been inferred from the clustering of differentially expressed lncRNA.		Cheng J et al., 2021
LINC02614	Decrease (severe vs nonsevere)	17 severe, 12 non-severe patients and 10 healthy controls	PBMC	NA	RNA sequencing	Set of lncRNA could discriminate between severe and non-severe COVID-19. Potential immunological functions of the lncRNAs mainly for the observed decrease in total lymphocytes, T cell counts, CD4 + T cell counts and B cell counts and a significant increase in procalcitonin and CRP have been inferred from the clustering of differentially expressed lncRNA.		Cheng J et al., 2021
LINC02615	Decrease (severe vs nonsevere)	17 severe, 12 non-severe patients and 10 healthy controls	PBMC	NA	RNA sequencing	Set of lncRNA could discriminate between severe and non-severe COVID-19. Potential immunological functions of the lncRNAs mainly for the observed decrease in total lymphocytes, T cell counts, CD4 + T cell counts and B cell counts and a significant increase in procalcitonin and CRP have been inferred from the clustering of differentially expressed lncRNA.		Cheng J et al., 2021
LINC02648	Decrease (severe vs nonsevere)	17 severe, 12 non-severe patients and 10 healthy controls	PBMC	NA	RNA sequencing	Set of lncRNA could discriminate between severe and non-severe COVID-19. Potential immunological functions of the lncRNAs mainly for the observed decrease in total lymphocytes, T cell counts, CD4 + T cell counts and B cell counts and a significant increase in procalcitonin and CRP have been inferred from the clustering of differentially expressed lncRNA.		Cheng J et al., 2021
LINC02666	Decrease (severe vs nonsevere)	17 severe, 12 non-severe patients and 10 healthy controls	PBMC	NA	RNA sequencing	Set of lncRNA could discriminate between severe and non-severe COVID-19. Potential immunological functions of the lncRNAs mainly for the observed decrease in total lymphocytes, T cell counts, CD4 + T cell counts and B cell counts and a significant increase in procalcitonin and CRP have been inferred from the clustering of differentially expressed lncRNA.		Cheng J et al., 2021
LINC02694	Decrease (severe vs nonsevere)	17 severe, 12 non-severe patients and 10 healthy controls	PBMC	NA	RNA sequencing	Set of lncRNA could discriminate between severe and non-severe COVID-19. Potential immunological functions of the lncRNAs mainly for the observed decrease in total lymphocytes, T cell counts, CD4 + T cell counts and B cell counts and a significant increase in procalcitonin and CRP have been inferred from the clustering of differentially expressed lncRNA.		Cheng J et al., 2021
LINC02700	Decrease (severe vs nonsevere)	17 severe, 12 non-severe patients and 10 healthy controls	PBMC	NA	RNA sequencing	Set of lncRNA could discriminate between severe and non-severe COVID-19. Potential immunological functions of the lncRNAs mainly for the observed decrease in total lymphocytes, T cell counts, CD4 + T cell counts and B cell counts and a significant increase in procalcitonin and CRP have been inferred from the clustering of differentially expressed lncRNA.		Cheng J et al., 2021
LINC02723	Decrease (severe vs nonsevere)	17 severe, 12 non-severe patients and 10 healthy controls	PBMC	NA	RNA sequencing	Set of lncRNA could discriminate between severe and non-severe COVID-19. Potential immunological functions of the lncRNAs mainly for the observed decrease in total lymphocytes, T cell counts, CD4 + T cell counts and B cell counts and a significant increase in procalcitonin and CRP have been inferred from the clustering of differentially expressed lncRNA.		Cheng J et al., 2021
LINC02728	Decrease (severe vs nonsevere)	17 severe, 12 non-severe patients and 10 healthy controls	PBMC	NA	RNA sequencing	Set of lncRNA could discriminate between severe and non-severe COVID-19. Potential immunological functions of the lncRNAs mainly for the observed decrease in total lymphocytes, T cell counts, CD4 + T cell counts and B cell counts and a significant increase in procalcitonin and CRP have been inferred from the clustering of differentially expressed lncRNA.		Cheng J et al., 2021
LINC02731	Decrease (severe vs nonsevere)	17 severe, 12 non-severe patients and 10 healthy controls	PBMC	NA	RNA sequencing	Set of lncRNA could discriminate between severe and non-severe COVID-19. Potential immunological functions of the lncRNAs mainly for the observed decrease in total lymphocytes, T cell counts, CD4 + T cell counts and B cell counts and a significant increase in procalcitonin and CRP have been inferred from the clustering of differentially expressed lncRNA.		Cheng J et al., 2021
LINC02754	Decrease (severe vs nonsevere)	17 severe, 12 non-severe patients and 10 healthy controls	PBMC	NA	RNA sequencing	Set of lncRNA could discriminate between severe and non-severe COVID-19. Potential immunological functions of the lncRNAs mainly for the observed decrease in total lymphocytes, T cell counts, CD4 + T cell counts and B cell counts and a significant increase in procalcitonin and CRP have been inferred from the clustering of differentially expressed lncRNA.		Cheng J et al., 2021
LINC02766	Decrease (severe vs nonsevere)	17 severe, 12 non-severe patients and 10 healthy controls	PBMC	NA	RNA sequencing	Set of lncRNA could discriminate between severe and non-severe COVID-19. Potential immunological functions of the lncRNAs mainly for the observed decrease in total lymphocytes, T cell counts, CD4 + T cell counts and B cell counts and a significant increase in procalcitonin and CRP have been inferred from the clustering of differentially expressed lncRNA.		Cheng J et al., 2021
LINC02773	Decrease (severe vs nonsevere)	17 severe, 12 non-severe patients and 10 healthy controls	PBMC	NA	RNA sequencing	Set of lncRNA could discriminate between severe and non-severe COVID-19. Potential immunological functions of the lncRNAs mainly for the observed decrease in total lymphocytes, T cell counts, CD4 + T cell counts and B cell counts and a significant increase in procalcitonin and CRP have been inferred from the clustering of differentially expressed lncRNA.		Cheng J et al., 2021
LINC02776	Decrease (severe vs nonsevere)	17 severe, 12 non-severe patients and 10 healthy controls	PBMC	NA	RNA sequencing	Set of lncRNA could discriminate between severe and non-severe COVID-19. Potential immunological functions of the lncRNAs mainly for the observed decrease in total lymphocytes, T cell counts, CD4 + T cell counts and B cell counts and a significant increase in procalcitonin and CRP have been inferred from the clustering of differentially expressed lncRNA.		Cheng J et al., 2021
LINC02812	Decrease (severe vs nonsevere)	17 severe, 12 non-severe patients and 10 healthy controls	PBMC	NA	RNA sequencing	Set of lncRNA could discriminate between severe and non-severe COVID-19. Potential immunological functions of the lncRNAs mainly for the observed decrease in total lymphocytes, T cell counts, CD4 + T cell counts and B cell counts and a significant increase in procalcitonin and CRP have been inferred from the clustering of differentially expressed lncRNA.		Cheng J et al., 2021
LINC-PINT	Decrease (severe vs nonsevere)	17 severe, 12 non-severe patients and 10 healthy controls	PBMC	NA	RNA sequencing	Set of lncRNA could discriminate between severe and non-severe COVID-19. Potential immunological functions of the lncRNAs mainly for the observed decrease in total lymphocytes, T cell counts, CD4 + T cell counts and B cell counts and a significant increase in procalcitonin and CRP have been inferred from the clustering of differentially expressed lncRNA.		Cheng J et al., 2021
LIX1-AS1	Decrease (severe vs nonsevere)	17 severe, 12 non-severe patients and 10 healthy controls	PBMC	NA	RNA sequencing	Set of lncRNA could discriminate between severe and non-severe COVID-19. Potential immunological functions of the lncRNAs mainly for the observed decrease in total lymphocytes, T cell counts, CD4 + T cell counts and B cell counts and a significant increase in procalcitonin and CRP have been inferred from the clustering of differentially expressed lncRNA.		Cheng J et al., 2021
LY6E-DT	Decrease (severe vs nonsevere)	17 severe, 12 non-severe patients and 10 healthy controls	PBMC	NA	RNA sequencing	Set of lncRNA could discriminate between severe and non-severe COVID-19. Potential immunological functions of the lncRNAs mainly for the observed decrease in total lymphocytes, T cell counts, CD4 + T cell counts and B cell counts and a significant increase in procalcitonin and CRP have been inferred from the clustering of differentially expressed lncRNA.		Cheng J et al., 2021
MALAT1	Decrease (severe vs nonsevere)	17 severe, 12 non-severe patients and 10 healthy controls	PBMC	NA	RNA sequencing	Set of lncRNA could discriminate between severe and non-severe COVID-19. Potential immunological functions of the lncRNAs mainly for the observed decrease in total lymphocytes, T cell counts, CD4 + T cell counts and B cell counts and a significant increase in procalcitonin and CRP have been inferred from the clustering of differentially expressed lncRNA.		Cheng J et al., 2021
MAPKAPK5-AS1	Decrease (severe vs nonsevere)	17 severe, 12 non-severe patients and 10 healthy controls	PBMC	NA	RNA sequencing	Set of lncRNA could discriminate between severe and non-severe COVID-19. Potential immunological functions of the lncRNAs mainly for the observed decrease in total lymphocytes, T cell counts, CD4 + T cell counts and B cell counts and a significant increase in procalcitonin and CRP have been inferred from the clustering of differentially expressed lncRNA.		Cheng J et al., 2021
MDS2	Decrease (severe vs nonsevere)	17 severe, 12 non-severe patients and 10 healthy controls	PBMC	NA	RNA sequencing	Set of lncRNA could discriminate between severe and non-severe COVID-19. Potential immunological functions of the lncRNAs mainly for the observed decrease in total lymphocytes, T cell counts, CD4 + T cell counts and B cell counts and a significant increase in procalcitonin and CRP have been inferred from the clustering of differentially expressed lncRNA.		Cheng J et al., 2021
MIAT	Decrease (severe vs nonsevere)	17 severe, 12 non-severe patients and 10 healthy controls	PBMC	NA	RNA sequencing	Set of lncRNA could discriminate between severe and non-severe COVID-19. Potential immunological functions of the lncRNAs mainly for the observed decrease in total lymphocytes, T cell counts, CD4 + T cell counts and B cell counts and a significant increase in procalcitonin and CRP have been inferred from the clustering of differentially expressed lncRNA.		Cheng J et al., 2021
MIATNB	Decrease (severe vs nonsevere)	17 severe, 12 non-severe patients and 10 healthy controls	PBMC	NA	RNA sequencing	Set of lncRNA could discriminate between severe and non-severe COVID-19. Potential immunological functions of the lncRNAs mainly for the observed decrease in total lymphocytes, T cell counts, CD4 + T cell counts and B cell counts and a significant increase in procalcitonin and CRP have been inferred from the clustering of differentially expressed lncRNA.		Cheng J et al., 2021
MIR155HG	Decrease (severe vs nonsevere)	17 severe, 12 non-severe patients and 10 healthy controls	PBMC	NA	RNA sequencing	Set of lncRNA could discriminate between severe and non-severe COVID-19. Potential immunological functions of the lncRNAs mainly for the observed decrease in total lymphocytes, T cell counts, CD4 + T cell counts and B cell counts and a significant increase in procalcitonin and CRP have been inferred from the clustering of differentially expressed lncRNA.		Cheng J et al., 2021
MIR17HG	Decrease (severe vs nonsevere)	17 severe, 12 non-severe patients and 10 healthy controls	PBMC	NA	RNA sequencing	Set of lncRNA could discriminate between severe and non-severe COVID-19. Potential immunological functions of the lncRNAs mainly for the observed decrease in total lymphocytes, T cell counts, CD4 + T cell counts and B cell counts and a significant increase in procalcitonin and CRP have been inferred from the clustering of differentially expressed lncRNA.		Cheng J et al., 2021
MIR181A1HG	Decrease (severe vs nonsevere)	17 severe, 12 non-severe patients and 10 healthy controls	PBMC	NA	RNA sequencing	Set of lncRNA could discriminate between severe and non-severe COVID-19. Potential immunological functions of the lncRNAs mainly for the observed decrease in total lymphocytes, T cell counts, CD4 + T cell counts and B cell counts and a significant increase in procalcitonin and CRP have been inferred from the clustering of differentially expressed lncRNA.		Cheng J et al., 2021
MIR200CHG	Decrease (severe vs nonsevere)	17 severe, 12 non-severe patients and 10 healthy controls	PBMC	NA	RNA sequencing	Set of lncRNA could discriminate between severe and non-severe COVID-19. Potential immunological functions of the lncRNAs mainly for the observed decrease in total lymphocytes, T cell counts, CD4 + T cell counts and B cell counts and a significant increase in procalcitonin and CRP have been inferred from the clustering of differentially expressed lncRNA.		Cheng J et al., 2021
MIR222HG	Decrease (severe vs nonsevere)	17 severe, 12 non-severe patients and 10 healthy controls	PBMC	NA	RNA sequencing	Set of lncRNA could discriminate between severe and non-severe COVID-19. Potential immunological functions of the lncRNAs mainly for the observed decrease in total lymphocytes, T cell counts, CD4 + T cell counts and B cell counts and a significant increase in procalcitonin and CRP have been inferred from the clustering of differentially expressed lncRNA.		Cheng J et al., 2021
MIR22HG	Decrease (severe vs nonsevere)	17 severe, 12 non-severe patients and 10 healthy controls	PBMC	NA	RNA sequencing	Set of lncRNA could discriminate between severe and non-severe COVID-19. Potential immunological functions of the lncRNAs mainly for the observed decrease in total lymphocytes, T cell counts, CD4 + T cell counts and B cell counts and a significant increase in procalcitonin and CRP have been inferred from the clustering of differentially expressed lncRNA.		Cheng J et al., 2021
MIR3142HG	Decrease (severe vs nonsevere)	17 severe, 12 non-severe patients and 10 healthy controls	PBMC	NA	RNA sequencing	Set of lncRNA could discriminate between severe and non-severe COVID-19. Potential immunological functions of the lncRNAs mainly for the observed decrease in total lymphocytes, T cell counts, CD4 + T cell counts and B cell counts and a significant increase in procalcitonin and CRP have been inferred from the clustering of differentially expressed lncRNA.		Cheng J et al., 2021
MIR663AHG	Decrease (severe vs nonsevere)	17 severe, 12 non-severe patients and 10 healthy controls	PBMC	NA	RNA sequencing	Set of lncRNA could discriminate between severe and non-severe COVID-19. Potential immunological functions of the lncRNAs mainly for the observed decrease in total lymphocytes, T cell counts, CD4 + T cell counts and B cell counts and a significant increase in procalcitonin and CRP have been inferred from the clustering of differentially expressed lncRNA.		Cheng J et al., 2021
MIR9-3HG	Decrease (severe vs nonsevere)	17 severe, 12 non-severe patients and 10 healthy controls	PBMC	NA	RNA sequencing	Set of lncRNA could discriminate between severe and non-severe COVID-19. Potential immunological functions of the lncRNAs mainly for the observed decrease in total lymphocytes, T cell counts, CD4 + T cell counts and B cell counts and a significant increase in procalcitonin and CRP have been inferred from the clustering of differentially expressed lncRNA.		Cheng J et al., 2021
MIRLET7A1HG	Decrease (severe vs nonsevere)	17 severe, 12 non-severe patients and 10 healthy controls	PBMC	NA	RNA sequencing	Set of lncRNA could discriminate between severe and non-severe COVID-19. Potential immunological functions of the lncRNAs mainly for the observed decrease in total lymphocytes, T cell counts, CD4 + T cell counts and B cell counts and a significant increase in procalcitonin and CRP have been inferred from the clustering of differentially expressed lncRNA.		Cheng J et al., 2021
MMP2-AS1	Decrease (severe vs nonsevere)	17 severe, 12 non-severe patients and 10 healthy controls	PBMC	NA	RNA sequencing	Set of lncRNA could discriminate between severe and non-severe COVID-19. Potential immunological functions of the lncRNAs mainly for the observed decrease in total lymphocytes, T cell counts, CD4 + T cell counts and B cell counts and a significant increase in procalcitonin and CRP have been inferred from the clustering of differentially expressed lncRNA.		Cheng J et al., 2021
MUC20-OT1	Decrease (severe vs nonsevere)	17 severe, 12 non-severe patients and 10 healthy controls	PBMC	NA	RNA sequencing	Set of lncRNA could discriminate between severe and non-severe COVID-19. Potential immunological functions of the lncRNAs mainly for the observed decrease in total lymphocytes, T cell counts, CD4 + T cell counts and B cell counts and a significant increase in procalcitonin and CRP have been inferred from the clustering of differentially expressed lncRNA.		Cheng J et al., 2021
NORAD	Decrease (severe vs nonsevere)	17 severe, 12 non-severe patients and 10 healthy controls	PBMC	NA	RNA sequencing	Set of lncRNA could discriminate between severe and non-severe COVID-19. Potential immunological functions of the lncRNAs mainly for the observed decrease in total lymphocytes, T cell counts, CD4 + T cell counts and B cell counts and a significant increase in procalcitonin and CRP have been inferred from the clustering of differentially expressed lncRNA.		Cheng J et al., 2021
ODC1-DT	Decrease (severe vs nonsevere)	17 severe, 12 non-severe patients and 10 healthy controls	PBMC	NA	RNA sequencing	Set of lncRNA could discriminate between severe and non-severe COVID-19. Potential immunological functions of the lncRNAs mainly for the observed decrease in total lymphocytes, T cell counts, CD4 + T cell counts and B cell counts and a significant increase in procalcitonin and CRP have been inferred from the clustering of differentially expressed lncRNA.		Cheng J et al., 2021
OGFRP1	Decrease (severe vs nonsevere)	17 severe, 12 non-severe patients and 10 healthy controls	PBMC	NA	RNA sequencing	Set of lncRNA could discriminate between severe and non-severe COVID-19. Potential immunological functions of the lncRNAs mainly for the observed decrease in total lymphocytes, T cell counts, CD4 + T cell counts and B cell counts and a significant increase in procalcitonin and CRP have been inferred from the clustering of differentially expressed lncRNA.		Cheng J et al., 2021
OLMALINC	Decrease (severe vs nonsevere)	17 severe, 12 non-severe patients and 10 healthy controls	PBMC	NA	RNA sequencing	Set of lncRNA could discriminate between severe and non-severe COVID-19. Potential immunological functions of the lncRNAs mainly for the observed decrease in total lymphocytes, T cell counts, CD4 + T cell counts and B cell counts and a significant increase in procalcitonin and CRP have been inferred from the clustering of differentially expressed lncRNA.		Cheng J et al., 2021
PAXIP1-AS1	Decrease (severe vs nonsevere)	17 severe, 12 non-severe patients and 10 healthy controls	PBMC	NA	RNA sequencing	Set of lncRNA could discriminate between severe and non-severe COVID-19. Potential immunological functions of the lncRNAs mainly for the observed decrease in total lymphocytes, T cell counts, CD4 + T cell counts and B cell counts and a significant increase in procalcitonin and CRP have been inferred from the clustering of differentially expressed lncRNA.		Cheng J et al., 2021
PCCA-DT	Decrease (severe vs nonsevere)	17 severe, 12 non-severe patients and 10 healthy controls	PBMC	NA	RNA sequencing	Set of lncRNA could discriminate between severe and non-severe COVID-19. Potential immunological functions of the lncRNAs mainly for the observed decrease in total lymphocytes, T cell counts, CD4 + T cell counts and B cell counts and a significant increase in procalcitonin and CRP have been inferred from the clustering of differentially expressed lncRNA.		Cheng J et al., 2021
PCED1B-AS1	Decrease (severe vs nonsevere)	17 severe, 12 non-severe patients and 10 healthy controls	PBMC	NA	RNA sequencing	Set of lncRNA could discriminate between severe and non-severe COVID-19. Potential immunological functions of the lncRNAs mainly for the observed decrease in total lymphocytes, T cell counts, CD4 + T cell counts and B cell counts and a significant increase in procalcitonin and CRP have been inferred from the clustering of differentially expressed lncRNA.		Cheng J et al., 2021
PKIA-AS1	Decrease (severe vs nonsevere)	17 severe, 12 non-severe patients and 10 healthy controls	PBMC	NA	RNA sequencing	Set of lncRNA could discriminate between severe and non-severe COVID-19. Potential immunological functions of the lncRNAs mainly for the observed decrease in total lymphocytes, T cell counts, CD4 + T cell counts and B cell counts and a significant increase in procalcitonin and CRP have been inferred from the clustering of differentially expressed lncRNA.		Cheng J et al., 2021
PRKCQ-AS1	Decrease (severe vs nonsevere)	17 severe, 12 non-severe patients and 10 healthy controls	PBMC	NA	RNA sequencing	Set of lncRNA could discriminate between severe and non-severe COVID-19. Potential immunological functions of the lncRNAs mainly for the observed decrease in total lymphocytes, T cell counts, CD4 + T cell counts and B cell counts and a significant increase in procalcitonin and CRP have been inferred from the clustering of differentially expressed lncRNA.		Cheng J et al., 2021
PRNCR1	Decrease (severe vs nonsevere)	17 severe, 12 non-severe patients and 10 healthy controls	PBMC	NA	RNA sequencing	Set of lncRNA could discriminate between severe and non-severe COVID-19. Potential immunological functions of the lncRNAs mainly for the observed decrease in total lymphocytes, T cell counts, CD4 + T cell counts and B cell counts and a significant increase in procalcitonin and CRP have been inferred from the clustering of differentially expressed lncRNA.		Cheng J et al., 2021
PRR29-AS1	Decrease (severe vs nonsevere)	17 severe, 12 non-severe patients and 10 healthy controls	PBMC	NA	RNA sequencing	Set of lncRNA could discriminate between severe and non-severe COVID-19. Potential immunological functions of the lncRNAs mainly for the observed decrease in total lymphocytes, T cell counts, CD4 + T cell counts and B cell counts and a significant increase in procalcitonin and CRP have been inferred from the clustering of differentially expressed lncRNA.		Cheng J et al., 2021
PVT1	Decrease (severe vs nonsevere)	17 severe, 12 non-severe patients and 10 healthy controls	PBMC	NA	RNA sequencing	Set of lncRNA could discriminate between severe and non-severe COVID-19. Potential immunological functions of the lncRNAs mainly for the observed decrease in total lymphocytes, T cell counts, CD4 + T cell counts and B cell counts and a significant increase in procalcitonin and CRP have been inferred from the clustering of differentially expressed lncRNA.		Cheng J et al., 2021
RB1-DT	Decrease (severe vs nonsevere)	17 severe, 12 non-severe patients and 10 healthy controls	PBMC	NA	RNA sequencing	Set of lncRNA could discriminate between severe and non-severe COVID-19. Potential immunological functions of the lncRNAs mainly for the observed decrease in total lymphocytes, T cell counts, CD4 + T cell counts and B cell counts and a significant increase in procalcitonin and CRP have been inferred from the clustering of differentially expressed lncRNA.		Cheng J et al., 2021
RBFADN	Decrease (severe vs nonsevere)	17 severe, 12 non-severe patients and 10 healthy controls	PBMC	NA	RNA sequencing	Set of lncRNA could discriminate between severe and non-severe COVID-19. Potential immunological functions of the lncRNAs mainly for the observed decrease in total lymphocytes, T cell counts, CD4 + T cell counts and B cell counts and a significant increase in procalcitonin and CRP have been inferred from the clustering of differentially expressed lncRNA.		Cheng J et al., 2021
RFPL3S	Decrease (severe vs nonsevere)	17 severe, 12 non-severe patients and 10 healthy controls	PBMC	NA	RNA sequencing	Set of lncRNA could discriminate between severe and non-severe COVID-19. Potential immunological functions of the lncRNAs mainly for the observed decrease in total lymphocytes, T cell counts, CD4 + T cell counts and B cell counts and a significant increase in procalcitonin and CRP have been inferred from the clustering of differentially expressed lncRNA.		Cheng J et al., 2021
RFX3-AS1	Decrease (severe vs nonsevere)	17 severe, 12 non-severe patients and 10 healthy controls	PBMC	NA	RNA sequencing	Set of lncRNA could discriminate between severe and non-severe COVID-19. Potential immunological functions of the lncRNAs mainly for the observed decrease in total lymphocytes, T cell counts, CD4 + T cell counts and B cell counts and a significant increase in procalcitonin and CRP have been inferred from the clustering of differentially expressed lncRNA.		Cheng J et al., 2021
RNF139-AS1	Decrease (severe vs nonsevere)	17 severe, 12 non-severe patients and 10 healthy controls	PBMC	NA	RNA sequencing	Set of lncRNA could discriminate between severe and non-severe COVID-19. Potential immunological functions of the lncRNAs mainly for the observed decrease in total lymphocytes, T cell counts, CD4 + T cell counts and B cell counts and a significant increase in procalcitonin and CRP have been inferred from the clustering of differentially expressed lncRNA.		Cheng J et al., 2021
RPL34-AS1	Decrease (severe vs nonsevere)	17 severe, 12 non-severe patients and 10 healthy controls	PBMC	NA	RNA sequencing	Set of lncRNA could discriminate between severe and non-severe COVID-19. Potential immunological functions of the lncRNAs mainly for the observed decrease in total lymphocytes, T cell counts, CD4 + T cell counts and B cell counts and a significant increase in procalcitonin and CRP have been inferred from the clustering of differentially expressed lncRNA.		Cheng J et al., 2021
RRS1-AS1	Decrease (severe vs nonsevere)	17 severe, 12 non-severe patients and 10 healthy controls	PBMC	NA	RNA sequencing	Set of lncRNA could discriminate between severe and non-severe COVID-19. Potential immunological functions of the lncRNAs mainly for the observed decrease in total lymphocytes, T cell counts, CD4 + T cell counts and B cell counts and a significant increase in procalcitonin and CRP have been inferred from the clustering of differentially expressed lncRNA.		Cheng J et al., 2021
SCAMP1-AS1	Decrease (severe vs nonsevere)	17 severe, 12 non-severe patients and 10 healthy controls	PBMC	NA	RNA sequencing	Set of lncRNA could discriminate between severe and non-severe COVID-19. Potential immunological functions of the lncRNAs mainly for the observed decrease in total lymphocytes, T cell counts, CD4 + T cell counts and B cell counts and a significant increase in procalcitonin and CRP have been inferred from the clustering of differentially expressed lncRNA.		Cheng J et al., 2021
SEPTIN7-DT	Decrease (severe vs nonsevere)	17 severe, 12 non-severe patients and 10 healthy controls	PBMC	NA	RNA sequencing	Set of lncRNA could discriminate between severe and non-severe COVID-19. Potential immunological functions of the lncRNAs mainly for the observed decrease in total lymphocytes, T cell counts, CD4 + T cell counts and B cell counts and a significant increase in procalcitonin and CRP have been inferred from the clustering of differentially expressed lncRNA.		Cheng J et al., 2021
SERPINB9P1	Decrease (severe vs nonsevere)	17 severe, 12 non-severe patients and 10 healthy controls	PBMC	NA	RNA sequencing	Set of lncRNA could discriminate between severe and non-severe COVID-19. Potential immunological functions of the lncRNAs mainly for the observed decrease in total lymphocytes, T cell counts, CD4 + T cell counts and B cell counts and a significant increase in procalcitonin and CRP have been inferred from the clustering of differentially expressed lncRNA.		Cheng J et al., 2021
SLC25A5-AS1	Decrease (severe vs nonsevere)	17 severe, 12 non-severe patients and 10 healthy controls	PBMC	NA	RNA sequencing	Set of lncRNA could discriminate between severe and non-severe COVID-19. Potential immunological functions of the lncRNAs mainly for the observed decrease in total lymphocytes, T cell counts, CD4 + T cell counts and B cell counts and a significant increase in procalcitonin and CRP have been inferred from the clustering of differentially expressed lncRNA.		Cheng J et al., 2021
SND1-IT1	Decrease (severe vs nonsevere)	17 severe, 12 non-severe patients and 10 healthy controls	PBMC	NA	RNA sequencing	Set of lncRNA could discriminate between severe and non-severe COVID-19. Potential immunological functions of the lncRNAs mainly for the observed decrease in total lymphocytes, T cell counts, CD4 + T cell counts and B cell counts and a significant increase in procalcitonin and CRP have been inferred from the clustering of differentially expressed lncRNA.		Cheng J et al., 2021
SNHG1	Decrease (severe vs nonsevere)	17 severe, 12 non-severe patients and 10 healthy controls	PBMC	NA	RNA sequencing	Set of lncRNA could discriminate between severe and non-severe COVID-19. Potential immunological functions of the lncRNAs mainly for the observed decrease in total lymphocytes, T cell counts, CD4 + T cell counts and B cell counts and a significant increase in procalcitonin and CRP have been inferred from the clustering of differentially expressed lncRNA.		Cheng J et al., 2021
SNHG11	Decrease (severe vs nonsevere)	17 severe, 12 non-severe patients and 10 healthy controls	PBMC	NA	RNA sequencing	Set of lncRNA could discriminate between severe and non-severe COVID-19. Potential immunological functions of the lncRNAs mainly for the observed decrease in total lymphocytes, T cell counts, CD4 + T cell counts and B cell counts and a significant increase in procalcitonin and CRP have been inferred from the clustering of differentially expressed lncRNA.		Cheng J et al., 2021
SNHG15	Decrease (severe vs nonsevere)	17 severe, 12 non-severe patients and 10 healthy controls	PBMC	NA	RNA sequencing	Set of lncRNA could discriminate between severe and non-severe COVID-19. Potential immunological functions of the lncRNAs mainly for the observed decrease in total lymphocytes, T cell counts, CD4 + T cell counts and B cell counts and a significant increase in procalcitonin and CRP have been inferred from the clustering of differentially expressed lncRNA.		Cheng J et al., 2021
SNHG16	Decrease (severe vs nonsevere)	17 severe, 12 non-severe patients and 10 healthy controls	PBMC	NA	RNA sequencing	Set of lncRNA could discriminate between severe and non-severe COVID-19. Potential immunological functions of the lncRNAs mainly for the observed decrease in total lymphocytes, T cell counts, CD4 + T cell counts and B cell counts and a significant increase in procalcitonin and CRP have been inferred from the clustering of differentially expressed lncRNA.		Cheng J et al., 2021
SNHG17	Decrease (severe vs nonsevere)	17 severe, 12 non-severe patients and 10 healthy controls	PBMC	NA	RNA sequencing	Set of lncRNA could discriminate between severe and non-severe COVID-19. Potential immunological functions of the lncRNAs mainly for the observed decrease in total lymphocytes, T cell counts, CD4 + T cell counts and B cell counts and a significant increase in procalcitonin and CRP have been inferred from the clustering of differentially expressed lncRNA.		Cheng J et al., 2021
SNHG19	Decrease (severe vs nonsevere)	17 severe, 12 non-severe patients and 10 healthy controls	PBMC	NA	RNA sequencing	Set of lncRNA could discriminate between severe and non-severe COVID-19. Potential immunological functions of the lncRNAs mainly for the observed decrease in total lymphocytes, T cell counts, CD4 + T cell counts and B cell counts and a significant increase in procalcitonin and CRP have been inferred from the clustering of differentially expressed lncRNA.		Cheng J et al., 2021
SNHG20	Decrease (severe vs nonsevere)	17 severe, 12 non-severe patients and 10 healthy controls	PBMC	NA	RNA sequencing	Set of lncRNA could discriminate between severe and non-severe COVID-19. Potential immunological functions of the lncRNAs mainly for the observed decrease in total lymphocytes, T cell counts, CD4 + T cell counts and B cell counts and a significant increase in procalcitonin and CRP have been inferred from the clustering of differentially expressed lncRNA.		Cheng J et al., 2021
SNHG25	Decrease (severe vs nonsevere)	17 severe, 12 non-severe patients and 10 healthy controls	PBMC	NA	RNA sequencing	Set of lncRNA could discriminate between severe and non-severe COVID-19. Potential immunological functions of the lncRNAs mainly for the observed decrease in total lymphocytes, T cell counts, CD4 + T cell counts and B cell counts and a significant increase in procalcitonin and CRP have been inferred from the clustering of differentially expressed lncRNA.		Cheng J et al., 2021
SNHG26	Decrease (severe vs nonsevere)	17 severe, 12 non-severe patients and 10 healthy controls	PBMC	NA	RNA sequencing	Set of lncRNA could discriminate between severe and non-severe COVID-19. Potential immunological functions of the lncRNAs mainly for the observed decrease in total lymphocytes, T cell counts, CD4 + T cell counts and B cell counts and a significant increase in procalcitonin and CRP have been inferred from the clustering of differentially expressed lncRNA.		Cheng J et al., 2021
SNHG3	Decrease (severe vs nonsevere)	17 severe, 12 non-severe patients and 10 healthy controls	PBMC	NA	RNA sequencing	Set of lncRNA could discriminate between severe and non-severe COVID-19. Potential immunological functions of the lncRNAs mainly for the observed decrease in total lymphocytes, T cell counts, CD4 + T cell counts and B cell counts and a significant increase in procalcitonin and CRP have been inferred from the clustering of differentially expressed lncRNA.		Cheng J et al., 2021
SNHG4	Decrease (severe vs nonsevere)	17 severe, 12 non-severe patients and 10 healthy controls	PBMC	NA	RNA sequencing	Set of lncRNA could discriminate between severe and non-severe COVID-19. Potential immunological functions of the lncRNAs mainly for the observed decrease in total lymphocytes, T cell counts, CD4 + T cell counts and B cell counts and a significant increase in procalcitonin and CRP have been inferred from the clustering of differentially expressed lncRNA.		Cheng J et al., 2021
SNHG5	Decrease (severe vs nonsevere)	17 severe, 12 non-severe patients and 10 healthy controls	PBMC	NA	RNA sequencing	Set of lncRNA could discriminate between severe and non-severe COVID-19. Potential immunological functions of the lncRNAs mainly for the observed decrease in total lymphocytes, T cell counts, CD4 + T cell counts and B cell counts and a significant increase in procalcitonin and CRP have been inferred from the clustering of differentially expressed lncRNA.		Cheng J et al., 2021
SNHG6	Decrease (severe vs nonsevere)	17 severe, 12 non-severe patients and 10 healthy controls	PBMC	NA	RNA sequencing	Set of lncRNA could discriminate between severe and non-severe COVID-19. Potential immunological functions of the lncRNAs mainly for the observed decrease in total lymphocytes, T cell counts, CD4 + T cell counts and B cell counts and a significant increase in procalcitonin and CRP have been inferred from the clustering of differentially expressed lncRNA.		Cheng J et al., 2021
SNHG8	Decrease (severe vs nonsevere)	17 severe, 12 non-severe patients and 10 healthy controls	PBMC	NA	RNA sequencing	Set of lncRNA could discriminate between severe and non-severe COVID-19. Potential immunological functions of the lncRNAs mainly for the observed decrease in total lymphocytes, T cell counts, CD4 + T cell counts and B cell counts and a significant increase in procalcitonin and CRP have been inferred from the clustering of differentially expressed lncRNA.		Cheng J et al., 2021
SNHG9	Decrease (severe vs nonsevere)	17 severe, 12 non-severe patients and 10 healthy controls	PBMC	NA	RNA sequencing	Set of lncRNA could discriminate between severe and non-severe COVID-19. Potential immunological functions of the lncRNAs mainly for the observed decrease in total lymphocytes, T cell counts, CD4 + T cell counts and B cell counts and a significant increase in procalcitonin and CRP have been inferred from the clustering of differentially expressed lncRNA.		Cheng J et al., 2021
SRP14-AS1	Decrease (severe vs nonsevere)	17 severe, 12 non-severe patients and 10 healthy controls	PBMC	NA	RNA sequencing	Set of lncRNA could discriminate between severe and non-severe COVID-19. Potential immunological functions of the lncRNAs mainly for the observed decrease in total lymphocytes, T cell counts, CD4 + T cell counts and B cell counts and a significant increase in procalcitonin and CRP have been inferred from the clustering of differentially expressed lncRNA.		Cheng J et al., 2021
ST3GAL5-AS1	Decrease (severe vs nonsevere)	17 severe, 12 non-severe patients and 10 healthy controls	PBMC	NA	RNA sequencing	Set of lncRNA could discriminate between severe and non-severe COVID-19. Potential immunological functions of the lncRNAs mainly for the observed decrease in total lymphocytes, T cell counts, CD4 + T cell counts and B cell counts and a significant increase in procalcitonin and CRP have been inferred from the clustering of differentially expressed lncRNA.		Cheng J et al., 2021
SUCLG2-AS1	Decrease (severe vs nonsevere)	17 severe, 12 non-severe patients and 10 healthy controls	PBMC	NA	RNA sequencing	Set of lncRNA could discriminate between severe and non-severe COVID-19. Potential immunological functions of the lncRNAs mainly for the observed decrease in total lymphocytes, T cell counts, CD4 + T cell counts and B cell counts and a significant increase in procalcitonin and CRP have been inferred from the clustering of differentially expressed lncRNA.		Cheng J et al., 2021
TCL6	Decrease (severe vs nonsevere)	17 severe, 12 non-severe patients and 10 healthy controls	PBMC	NA	RNA sequencing	Set of lncRNA could discriminate between severe and non-severe COVID-19. Potential immunological functions of the lncRNAs mainly for the observed decrease in total lymphocytes, T cell counts, CD4 + T cell counts and B cell counts and a significant increase in procalcitonin and CRP have been inferred from the clustering of differentially expressed lncRNA.		Cheng J et al., 2021
TMEM202-AS1	Decrease (severe vs nonsevere)	17 severe, 12 non-severe patients and 10 healthy controls	PBMC	NA	RNA sequencing	Set of lncRNA could discriminate between severe and non-severe COVID-19. Potential immunological functions of the lncRNAs mainly for the observed decrease in total lymphocytes, T cell counts, CD4 + T cell counts and B cell counts and a significant increase in procalcitonin and CRP have been inferred from the clustering of differentially expressed lncRNA.		Cheng J et al., 2021
TP53TG1	Decrease (severe vs nonsevere)	17 severe, 12 non-severe patients and 10 healthy controls	PBMC	NA	RNA sequencing	Set of lncRNA could discriminate between severe and non-severe COVID-19. Potential immunological functions of the lncRNAs mainly for the observed decrease in total lymphocytes, T cell counts, CD4 + T cell counts and B cell counts and a significant increase in procalcitonin and CRP have been inferred from the clustering of differentially expressed lncRNA.		Cheng J et al., 2021
TRBV11-2	Decrease (severe vs nonsevere)	17 severe, 12 non-severe patients and 10 healthy controls	PBMC	NA	RNA sequencing	Set of lncRNA could discriminate between severe and non-severe COVID-19. Potential immunological functions of the lncRNAs mainly for the observed decrease in total lymphocytes, T cell counts, CD4 + T cell counts and B cell counts and a significant increase in procalcitonin and CRP have been inferred from the clustering of differentially expressed lncRNA.		Cheng J et al., 2021
VASH1-AS1	Decrease (severe vs nonsevere)	17 severe, 12 non-severe patients and 10 healthy controls	PBMC	NA	RNA sequencing	Set of lncRNA could discriminate between severe and non-severe COVID-19. Potential immunological functions of the lncRNAs mainly for the observed decrease in total lymphocytes, T cell counts, CD4 + T cell counts and B cell counts and a significant increase in procalcitonin and CRP have been inferred from the clustering of differentially expressed lncRNA.		Cheng J et al., 2021
XIST	Decrease (severe vs nonsevere)	17 severe, 12 non-severe patients and 10 healthy controls	PBMC	NA	RNA sequencing	Set of lncRNA could discriminate between severe and non-severe COVID-19. Potential immunological functions of the lncRNAs mainly for the observed decrease in total lymphocytes, T cell counts, CD4 + T cell counts and B cell counts and a significant increase in procalcitonin and CRP have been inferred from the clustering of differentially expressed lncRNA.		Cheng J et al., 2021
YTHDF3-AS1	Decrease (severe vs nonsevere)	17 severe, 12 non-severe patients and 10 healthy controls	PBMC	NA	RNA sequencing	Set of lncRNA could discriminate between severe and non-severe COVID-19. Potential immunological functions of the lncRNAs mainly for the observed decrease in total lymphocytes, T cell counts, CD4 + T cell counts and B cell counts and a significant increase in procalcitonin and CRP have been inferred from the clustering of differentially expressed lncRNA.		Cheng J et al., 2021
ZNF295-AS1	Decrease (severe vs nonsevere)	17 severe, 12 non-severe patients and 10 healthy controls	PBMC	NA	RNA sequencing	Set of lncRNA could discriminate between severe and non-severe COVID-19. Potential immunological functions of the lncRNAs mainly for the observed decrease in total lymphocytes, T cell counts, CD4 + T cell counts and B cell counts and a significant increase in procalcitonin and CRP have been inferred from the clustering of differentially expressed lncRNA.		Cheng J et al., 2021
ZNF528-AS1	Decrease (severe vs nonsevere)	17 severe, 12 non-severe patients and 10 healthy controls	PBMC	NA	RNA sequencing	Set of lncRNA could discriminate between severe and non-severe COVID-19. Potential immunological functions of the lncRNAs mainly for the observed decrease in total lymphocytes, T cell counts, CD4 + T cell counts and B cell counts and a significant increase in procalcitonin and CRP have been inferred from the clustering of differentially expressed lncRNA.		Cheng J et al., 2021
ZNF674-AS1	Decrease (severe vs nonsevere)	17 severe, 12 non-severe patients and 10 healthy controls	PBMC	NA	RNA sequencing	Set of lncRNA could discriminate between severe and non-severe COVID-19. Potential immunological functions of the lncRNAs mainly for the observed decrease in total lymphocytes, T cell counts, CD4 + T cell counts and B cell counts and a significant increase in procalcitonin and CRP have been inferred from the clustering of differentially expressed lncRNA.		Cheng J et al., 2021
EPB41L4A-AS1/ENSG00000224032.7	Decrease (BALF)	Cells infected with SARS-CoV-2 and COVID-19 patiens	Cell culture BALF	GSE147507, GSE139516, GSE148729 (Cell lines infected with SARS-CoV-2), BALF of COVID-19 patients were retrieved from the Genome Sequence Archive (https://bigd.big.ac.cn/, accessed on 2 February 2021), Beijing Institute of Genomics (accession number CRA002390) accession numbers SRR10571724, SRR10571730 and SRR10571732	Re-analysis of RNA sequencing data published earlier	Co-expressed gene indicated involvement of various immune-related pathways and cytokine signaling pathway in SARS-CoV-2 infection		Mukherjee S et al., 2021*
CFLAR-AS1/ENSG00000226312.7	Decrease (BALF)	Cells infected with SARS-CoV-2 and COVID-19 patiens	Cell culture BALF	GSE147507, GSE139516, GSE148729 (Cell lines infected with SARS-CoV-2), BALF of COVID-19 patients were retrieved from the Genome Sequence Archive (https://bigd.big.ac.cn/, accessed on 2 February 2021), Beijing Institute of Genomics (accession number CRA002390) accession numbers SRR10571724, SRR10571730 and SRR10571732	Re-analysis of RNA sequencing data published earlier	Co-expressed gene indicated involvement of various immune-related pathways and cytokine signaling pathway in SARS-CoV-2 infection		Mukherjee S et al., 2021
PDC-AS1/ENSG00000229739.4	Decrease (BALF)	Cells infected with SARS-CoV-2 and COVID-19 patiens	Cell culture BALF	GSE147507, GSE139516, GSE148729 (Cell lines infected with SARS-CoV-2), BALF of COVID-19 patients were retrieved from the Genome Sequence Archive (https://bigd.big.ac.cn/, accessed on 2 February 2021), Beijing Institute of Genomics (accession number CRA002390) accession numbers SRR10571724, SRR10571730 and SRR10571732	Re-analysis of RNA sequencing data published earlier	Co-expressed gene indicated involvement of various immune-related pathways and cytokine signaling pathway in SARS-CoV-2 infection		Mukherjee S et al., 2021
LINC-PINT/ENSG00000231721.7	Decrease (BALF)	Cells infected with SARS-CoV-2 and COVID-19 patiens	Cell culture BALF	GSE147507, GSE139516, GSE148729 (Cell lines infected with SARS-CoV-2), BALF of COVID-19 patients were retrieved from the Genome Sequence Archive (https://bigd.big.ac.cn/, accessed on 2 February 2021), Beijing Institute of Genomics (accession number CRA002390) accession numbers SRR10571724, SRR10571730 and SRR10571732	Re-analysis of RNA sequencing data published earlier	Co-expressed gene indicated involvement of various immune-related pathways and cytokine signaling pathway in SARS-CoV-2 infection		Mukherjee S et al., 2021
EIF2AK3-DT/ENSG00000234028.3	Decrease (BALF)	Cells infected with SARS-CoV-2 and COVID-19 patiens	Cell culture BALF	GSE147507, GSE139516, GSE148729 (Cell lines infected with SARS-CoV-2), BALF of COVID-19 patients were retrieved from the Genome Sequence Archive (https://bigd.big.ac.cn/, accessed on 2 February 2021), Beijing Institute of Genomics (accession number CRA002390) accession numbers SRR10571724, SRR10571730 and SRR10571732	Re-analysis of RNA sequencing data published earlier	Co-expressed gene indicated involvement of various immune-related pathways and cytokine signaling pathway in SARS-CoV-2 infection		Mukherjee S et al., 2021
EGOT/ENSG00000235947.1	Increase (BALF)	Cells infected with SARS-CoV-2 and COVID-19 patiens	Cell culture BALF	GSE147507, GSE139516, GSE148729 (Cell lines infected with SARS-CoV-2), BALF of COVID-19 patients were retrieved from the Genome Sequence Archive (https://bigd.big.ac.cn/, accessed on 2 February 2021), Beijing Institute of Genomics (accession number CRA002390) accession numbers SRR10571724, SRR10571730 and SRR10571732	Re-analysis of RNA sequencing data published earlier	Co-expressed gene indicated involvement of various immune-related pathways and cytokine signaling pathway in SARS-CoV-2 infection		Mukherjee S et al., 2021
WAKMAR2/ENSG00000237499.7	Decrease (BALF)	Cells infected with SARS-CoV-2 and COVID-19 patiens	Cell culture BALF	GSE147507, GSE139516, GSE148729 (Cell lines infected with SARS-CoV-2), BALF of COVID-19 patients were retrieved from the Genome Sequence Archive (https://bigd.big.ac.cn/, accessed on 2 February 2021), Beijing Institute of Genomics (accession number CRA002390) accession numbers SRR10571724, SRR10571730 and SRR10571732	Re-analysis of RNA sequencing data published earlier	Co-expressed gene indicated involvement of various immune-related pathways and cytokine signaling pathway in SARS-CoV-2 infection		Mukherjee S et al., 2021
MALAT1/ENSG00000251562.8	Decrease (BALF)	Cells infected with SARS-CoV-2 and COVID-19 patiens	Cell culture BALF	GSE147507, GSE139516, GSE148729 (Cell lines infected with SARS-CoV-2), BALF of COVID-19 patients were retrieved from the Genome Sequence Archive (https://bigd.big.ac.cn/, accessed on 2 February 2021), Beijing Institute of Genomics (accession number CRA002390) accession numbers SRR10571724, SRR10571730 and SRR10571732	Re-analysis of RNA sequencing data published earlier	Co-expressed gene indicated involvement of various immune-related pathways and cytokine signaling pathway in SARS-CoV-2 infection		Mukherjee S et al., 2021
LINC01619/ENSG00000257242.8	Decrease (BALF)	Cells infected with SARS-CoV-2 and COVID-19 patiens	Cell culture BALF	GSE147507, GSE139516, GSE148729 (Cell lines infected with SARS-CoV-2), BALF of COVID-19 patients were retrieved from the Genome Sequence Archive (https://bigd.big.ac.cn/, accessed on 2 February 2021), Beijing Institute of Genomics (accession number CRA002390) accession numbers SRR10571724, SRR10571730 and SRR10571732	Re-analysis of RNA sequencing data published earlier	Co-expressed gene indicated involvement of various immune-related pathways and cytokine signaling pathway in SARS-CoV-2 infection		Mukherjee S et al., 2021
RNF213-AS1/ENSG00000263069.6	Decrease (BALF)	Cells infected with SARS-CoV-2 and COVID-19 patiens	Cell culture BALF	GSE147507, GSE139516, GSE148729 (Cell lines infected with SARS-CoV-2), BALF of COVID-19 patients were retrieved from the Genome Sequence Archive (https://bigd.big.ac.cn/, accessed on 2 February 2021), Beijing Institute of Genomics (accession number CRA002390) accession numbers SRR10571724, SRR10571730 and SRR10571732	Re-analysis of RNA sequencing data published earlier	Co-expressed gene indicated involvement of various immune-related pathways and cytokine signaling pathway in SARS-CoV-2 infection		Mukherjee S et al., 2021
IRF2-DT/ENSG00000271646.1	Decrease (BALF)	Cells infected with SARS-CoV-2 and COVID-19 patiens	Cell culture BALF	GSE147507, GSE139516, GSE148729 (Cell lines infected with SARS-CoV-2), BALF of COVID-19 patients were retrieved from the Genome Sequence Archive (https://bigd.big.ac.cn/, accessed on 2 February 2021), Beijing Institute of Genomics (accession number CRA002390) accession numbers SRR10571724, SRR10571730 and SRR10571732	Re-analysis of RNA sequencing data published earlier	Co-expressed gene indicated involvement of various immune-related pathways and cytokine signaling pathway in SARS-CoV-2 infection		Mukherjee S et al., 2021
EPB41L4A-AS1/ENSG00000224032.7	Increase (Calu cells)	Cells infected with SARS-CoV-2 and COVID-19 patiens	Cell culture BALF	GSE147507, GSE139516, GSE148729 (Cell lines infected with SARS-CoV-2), BALF of COVID-19 patients were retrieved from the Genome Sequence Archive (https://bigd.big.ac.cn/, accessed on 2 February 2021), Beijing Institute of Genomics (accession number CRA002390) accession numbers SRR10571724, SRR10571730 and SRR10571732	Re-analysis of RNA sequencing data published earlier	Co-expressed gene indicated involvement of various immune-related pathways and cytokine signaling pathway in SARS-CoV-2 infection		Mukherjee S et al., 2021
CFLAR-AS1/ENSG00000226312.7	Increase (Calu cells)	Cells infected with SARS-CoV-2 and COVID-19 patiens	Cell culture BALF	GSE147507, GSE139516, GSE148729 (Cell lines infected with SARS-CoV-2), BALF of COVID-19 patients were retrieved from the Genome Sequence Archive (https://bigd.big.ac.cn/, accessed on 2 February 2021), Beijing Institute of Genomics (accession number CRA002390) accession numbers SRR10571724, SRR10571730 and SRR10571732	Re-analysis of RNA sequencing data published earlier	Co-expressed gene indicated involvement of various immune-related pathways and cytokine signaling pathway in SARS-CoV-2 infection		Mukherjee S et al., 2021
PDC-AS1/ENSG00000229739.4	Increase (Calu cells)	Cells infected with SARS-CoV-2 and COVID-19 patiens	Cell culture BALF	GSE147507, GSE139516, GSE148729 (Cell lines infected with SARS-CoV-2), BALF of COVID-19 patients were retrieved from the Genome Sequence Archive (https://bigd.big.ac.cn/, accessed on 2 February 2021), Beijing Institute of Genomics (accession number CRA002390) accession numbers SRR10571724, SRR10571730 and SRR10571732	Re-analysis of RNA sequencing data published earlier	Co-expressed gene indicated involvement of various immune-related pathways and cytokine signaling pathway in SARS-CoV-2 infection		Mukherjee S et al., 2021
LINC-PINT/ENSG00000231721.7	Increase (Calu cells)	Cells infected with SARS-CoV-2 and COVID-19 patiens	Cell culture BALF	GSE147507, GSE139516, GSE148729 (Cell lines infected with SARS-CoV-2), BALF of COVID-19 patients were retrieved from the Genome Sequence Archive (https://bigd.big.ac.cn/, accessed on 2 February 2021), Beijing Institute of Genomics (accession number CRA002390) accession numbers SRR10571724, SRR10571730 and SRR10571732	Re-analysis of RNA sequencing data published earlier	Co-expressed gene indicated involvement of various immune-related pathways and cytokine signaling pathway in SARS-CoV-2 infection		Mukherjee S et al., 2021
EIF2AK3-DT/ENSG00000234028.3	Increase (Calu cells)	Cells infected with SARS-CoV-2 and COVID-19 patiens	Cell culture BALF	GSE147507, GSE139516, GSE148729 (Cell lines infected with SARS-CoV-2), BALF of COVID-19 patients were retrieved from the Genome Sequence Archive (https://bigd.big.ac.cn/, accessed on 2 February 2021), Beijing Institute of Genomics (accession number CRA002390) accession numbers SRR10571724, SRR10571730 and SRR10571732	Re-analysis of RNA sequencing data published earlier	Co-expressed gene indicated involvement of various immune-related pathways and cytokine signaling pathway in SARS-CoV-2 infection		Mukherjee S et al., 2021
EGOT/ENSG00000235947.1	Increase (Calu cells)	Cells infected with SARS-CoV-2 and COVID-19 patiens	Cell culture BALF	GSE147507, GSE139516, GSE148729 (Cell lines infected with SARS-CoV-2), BALF of COVID-19 patients were retrieved from the Genome Sequence Archive (https://bigd.big.ac.cn/, accessed on 2 February 2021), Beijing Institute of Genomics (accession number CRA002390) accession numbers SRR10571724, SRR10571730 and SRR10571732	Re-analysis of RNA sequencing data published earlier	Co-expressed gene indicated involvement of various immune-related pathways and cytokine signaling pathway in SARS-CoV-2 infection		Mukherjee S et al., 2021
WAKMAR2/ENSG00000237499.7	Increase (Calu cells)	Cells infected with SARS-CoV-2 and COVID-19 patiens	Cell culture BALF	GSE147507, GSE139516, GSE148729 (Cell lines infected with SARS-CoV-2), BALF of COVID-19 patients were retrieved from the Genome Sequence Archive (https://bigd.big.ac.cn/, accessed on 2 February 2021), Beijing Institute of Genomics (accession number CRA002390) accession numbers SRR10571724, SRR10571730 and SRR10571732	Re-analysis of RNA sequencing data published earlier	Co-expressed gene indicated involvement of various immune-related pathways and cytokine signaling pathway in SARS-CoV-2 infection		Mukherjee S et al., 2021
MALAT1/ENSG00000251562.8	Increase (Calu cells)	Cells infected with SARS-CoV-2 and COVID-19 patiens	Cell culture BALF	GSE147507, GSE139516, GSE148729 (Cell lines infected with SARS-CoV-2), BALF of COVID-19 patients were retrieved from the Genome Sequence Archive (https://bigd.big.ac.cn/, accessed on 2 February 2021), Beijing Institute of Genomics (accession number CRA002390) accession numbers SRR10571724, SRR10571730 and SRR10571732	Re-analysis of RNA sequencing data published earlier	Co-expressed gene indicated involvement of various immune-related pathways and cytokine signaling pathway in SARS-CoV-2 infection		Mukherjee S et al., 2021
LINC01619/ENSG00000257242.8	Increase (Calu cells)	Cells infected with SARS-CoV-2 and COVID-19 patiens	Cell culture BALF	GSE147507, GSE139516, GSE148729 (Cell lines infected with SARS-CoV-2), BALF of COVID-19 patients were retrieved from the Genome Sequence Archive (https://bigd.big.ac.cn/, accessed on 2 February 2021), Beijing Institute of Genomics (accession number CRA002390) accession numbers SRR10571724, SRR10571730 and SRR10571732	Re-analysis of RNA sequencing data published earlier	Co-expressed gene indicated involvement of various immune-related pathways and cytokine signaling pathway in SARS-CoV-2 infection		Mukherjee S et al., 2021
RNF213-AS1/ENSG00000263069.6	Increase (Calu cells)	Cells infected with SARS-CoV-2 and COVID-19 patiens	Cell culture BALF	GSE147507, GSE139516, GSE148729 (Cell lines infected with SARS-CoV-2), BALF of COVID-19 patients were retrieved from the Genome Sequence Archive (https://bigd.big.ac.cn/, accessed on 2 February 2021), Beijing Institute of Genomics (accession number CRA002390) accession numbers SRR10571724, SRR10571730 and SRR10571732	Re-analysis of RNA sequencing data published earlier	Co-expressed gene indicated involvement of various immune-related pathways and cytokine signaling pathway in SARS-CoV-2 infection		Mukherjee S et al., 2021
IRF2-DT/ENSG00000271646.1	Increase (Calu cells)	Cells infected with SARS-CoV-2 and COVID-19 patiens	Cell culture BALF	GSE147507, GSE139516, GSE148729 (Cell lines infected with SARS-CoV-2), BALF of COVID-19 patients were retrieved from the Genome Sequence Archive (https://bigd.big.ac.cn/, accessed on 2 February 2021), Beijing Institute of Genomics (accession number CRA002390) accession numbers SRR10571724, SRR10571730 and SRR10571732	Re-analysis of RNA sequencing data published earlier	Co-expressed gene indicated involvement of various immune-related pathways and cytokine signaling pathway in SARS-CoV-2 infection		Mukherjee S et al., 2021
EPB41L4A-AS1/ENSG00000224032.7	Increase (A549 cells)	Cells infected with SARS-CoV-2 and COVID-19 patiens	Cell culture BALF	GSE147507, GSE139516, GSE148729 (Cell lines infected with SARS-CoV-2), BALF of COVID-19 patients were retrieved from the Genome Sequence Archive (https://bigd.big.ac.cn/, accessed on 2 February 2021), Beijing Institute of Genomics (accession number CRA002390) accession numbers SRR10571724, SRR10571730 and SRR10571732	Re-analysis of RNA sequencing data published earlier	Co-expressed gene indicated involvement of various immune-related pathways and cytokine signaling pathway in SARS-CoV-2 infection		Mukherjee S et al., 2021
CFLAR-AS1/ENSG00000226312.7	Increase (A549 cells)	Cells infected with SARS-CoV-2 and COVID-19 patiens	Cell culture BALF	GSE147507, GSE139516, GSE148729 (Cell lines infected with SARS-CoV-2), BALF of COVID-19 patients were retrieved from the Genome Sequence Archive (https://bigd.big.ac.cn/, accessed on 2 February 2021), Beijing Institute of Genomics (accession number CRA002390) accession numbers SRR10571724, SRR10571730 and SRR10571732	Re-analysis of RNA sequencing data published earlier	Co-expressed gene indicated involvement of various immune-related pathways and cytokine signaling pathway in SARS-CoV-2 infection		Mukherjee S et al., 2021
PDC-AS1/ENSG00000229739.4	Increase (A549 cells)	Cells infected with SARS-CoV-2 and COVID-19 patiens	Cell culture BALF	GSE147507, GSE139516, GSE148729 (Cell lines infected with SARS-CoV-2), BALF of COVID-19 patients were retrieved from the Genome Sequence Archive (https://bigd.big.ac.cn/, accessed on 2 February 2021), Beijing Institute of Genomics (accession number CRA002390) accession numbers SRR10571724, SRR10571730 and SRR10571732	Re-analysis of RNA sequencing data published earlier	Co-expressed gene indicated involvement of various immune-related pathways and cytokine signaling pathway in SARS-CoV-2 infection		Mukherjee S et al., 2021
LINC-PINT/ENSG00000231721.7	Increase (A549 cells)	Cells infected with SARS-CoV-2 and COVID-19 patiens	Cell culture BALF	GSE147507, GSE139516, GSE148729 (Cell lines infected with SARS-CoV-2), BALF of COVID-19 patients were retrieved from the Genome Sequence Archive (https://bigd.big.ac.cn/, accessed on 2 February 2021), Beijing Institute of Genomics (accession number CRA002390) accession numbers SRR10571724, SRR10571730 and SRR10571732	Re-analysis of RNA sequencing data published earlier	Co-expressed gene indicated involvement of various immune-related pathways and cytokine signaling pathway in SARS-CoV-2 infection		Mukherjee S et al., 2021
EIF2AK3-DT/ENSG00000234028.3	Increase (A549 cells)	Cells infected with SARS-CoV-2 and COVID-19 patiens	Cell culture BALF	GSE147507, GSE139516, GSE148729 (Cell lines infected with SARS-CoV-2), BALF of COVID-19 patients were retrieved from the Genome Sequence Archive (https://bigd.big.ac.cn/, accessed on 2 February 2021), Beijing Institute of Genomics (accession number CRA002390) accession numbers SRR10571724, SRR10571730 and SRR10571732	Re-analysis of RNA sequencing data published earlier	Co-expressed gene indicated involvement of various immune-related pathways and cytokine signaling pathway in SARS-CoV-2 infection		Mukherjee S et al., 2021
EGOT/ENSG00000235947.1	Increase (A549 cells)	Cells infected with SARS-CoV-2 and COVID-19 patiens	Cell culture BALF	GSE147507, GSE139516, GSE148729 (Cell lines infected with SARS-CoV-2), BALF of COVID-19 patients were retrieved from the Genome Sequence Archive (https://bigd.big.ac.cn/, accessed on 2 February 2021), Beijing Institute of Genomics (accession number CRA002390) accession numbers SRR10571724, SRR10571730 and SRR10571732	Re-analysis of RNA sequencing data published earlier	Co-expressed gene indicated involvement of various immune-related pathways and cytokine signaling pathway in SARS-CoV-2 infection		Mukherjee S et al., 2021
WAKMAR2/ENSG00000237499.7	Increase (A549 cells)	Cells infected with SARS-CoV-2 and COVID-19 patiens	Cell culture BALF	GSE147507, GSE139516, GSE148729 (Cell lines infected with SARS-CoV-2), BALF of COVID-19 patients were retrieved from the Genome Sequence Archive (https://bigd.big.ac.cn/, accessed on 2 February 2021), Beijing Institute of Genomics (accession number CRA002390) accession numbers SRR10571724, SRR10571730 and SRR10571732	Re-analysis of RNA sequencing data published earlier	Co-expressed gene indicated involvement of various immune-related pathways and cytokine signaling pathway in SARS-CoV-2 infection		Mukherjee S et al., 2021
MALAT1/ENSG00000251562.8	Increase (A549 cells)	Cells infected with SARS-CoV-2 and COVID-19 patiens	Cell culture BALF	GSE147507, GSE139516, GSE148729 (Cell lines infected with SARS-CoV-2), BALF of COVID-19 patients were retrieved from the Genome Sequence Archive (https://bigd.big.ac.cn/, accessed on 2 February 2021), Beijing Institute of Genomics (accession number CRA002390) accession numbers SRR10571724, SRR10571730 and SRR10571732	Re-analysis of RNA sequencing data published earlier	Co-expressed gene indicated involvement of various immune-related pathways and cytokine signaling pathway in SARS-CoV-2 infection		Mukherjee S et al., 2021
LINC01619/ENSG00000257242.8	Increase (A549 cells)	Cells infected with SARS-CoV-2 and COVID-19 patiens	Cell culture BALF	GSE147507, GSE139516, GSE148729 (Cell lines infected with SARS-CoV-2), BALF of COVID-19 patients were retrieved from the Genome Sequence Archive (https://bigd.big.ac.cn/, accessed on 2 February 2021), Beijing Institute of Genomics (accession number CRA002390) accession numbers SRR10571724, SRR10571730 and SRR10571732	Re-analysis of RNA sequencing data published earlier	Co-expressed gene indicated involvement of various immune-related pathways and cytokine signaling pathway in SARS-CoV-2 infection		Mukherjee S et al., 2021
RNF213-AS1/ENSG00000263069.6	Increase (A549 cells)	Cells infected with SARS-CoV-2 and COVID-19 patiens	Cell culture BALF	GSE147507, GSE139516, GSE148729 (Cell lines infected with SARS-CoV-2), BALF of COVID-19 patients were retrieved from the Genome Sequence Archive (https://bigd.big.ac.cn/, accessed on 2 February 2021), Beijing Institute of Genomics (accession number CRA002390) accession numbers SRR10571724, SRR10571730 and SRR10571732	Re-analysis of RNA sequencing data published earlier	Co-expressed gene indicated involvement of various immune-related pathways and cytokine signaling pathway in SARS-CoV-2 infection		Mukherjee S et al., 2021
IRF2-DT/ENSG00000271646.1	Increase (A549 cells)	Cells infected with SARS-CoV-2 and COVID-19 patiens	Cell culture BALF	GSE147507, GSE139516, GSE148729 (Cell lines infected with SARS-CoV-2), BALF of COVID-19 patients were retrieved from the Genome Sequence Archive (https://bigd.big.ac.cn/, accessed on 2 February 2021), Beijing Institute of Genomics (accession number CRA002390) accession numbers SRR10571724, SRR10571730 and SRR10571732	Re-analysis of RNA sequencing data published earlier	Co-expressed gene indicated involvement of various immune-related pathways and cytokine signaling pathway in SARS-CoV-2 infection		Mukherjee S et al., 2021
MIR3142HG	Increased	Cells infected with SARS-CoV-2 and COVID-19 patiens	human lung epithelium (NHBE) cells	GSE147507	Although several cell lines and conditions were used in this study, result of only one cell line was described	PPI network of 638 DE protein-coding genes and 332 SARS-CoV-2 protein interactors was constructed using STRING. Result revealed 21 differentially expressed lncRNAs broadly involved in cell survival and regulation of gene expression.		Turjya RR et al., 2020
LINC02015	Increased	Cells infected with SARS-CoV-2 and COVID-19 patiens	human lung epithelium (NHBE) cells	GSE147507	Although several cell lines and conditions were used in this study, result of only one cell line was described	PPI network of 638 DE protein-coding genes and 332 SARS-CoV-2 protein interactors was constructed using STRING. Result revealed 21 differentially expressed lncRNAs broadly involved in cell survival and regulation of gene expression.		Turjya RR et al., 2020
INHBA-AS1	Increased	Cells infected with SARS-CoV-2 and COVID-19 patiens	human lung epithelium (NHBE) cells	GSE147507	Although several cell lines and conditions were used in this study, result of only one cell line was described	PPI network of 638 DE protein-coding genes and 332 SARS-CoV-2 protein interactors was constructed using STRING. Result revealed 21 differentially expressed lncRNAs broadly involved in cell survival and regulation of gene expression.		Turjya RR et al., 2020
MEG3	Increased	Cells infected with SARS-CoV-2 and COVID-19 patiens	human lung epithelium (NHBE) cells	GSE147507	Although several cell lines and conditions were used in this study, result of only one cell line was described	PPI network of 638 DE protein-coding genes and 332 SARS-CoV-2 protein interactors was constructed using STRING. Result revealed 21 differentially expressed lncRNAs broadly involved in cell survival and regulation of gene expression.		Turjya RR et al., 2020
SNHG8	Decreased	Cells infected with SARS-CoV-2 and COVID-19 patiens	human lung epithelium (NHBE) cells	GSE147507	Although several cell lines and conditions were used in this study, result of only one cell line was described	PPI network of 638 DE protein-coding genes and 332 SARS-CoV-2 protein interactors was constructed using STRING. Result revealed 21 differentially expressed lncRNAs broadly involved in cell survival and regulation of gene expression.		Turjya RR et al., 2020
UGDH-AS1	Decreased	Cells infected with SARS-CoV-2 and COVID-19 patiens	human lung epithelium (NHBE) cells	GSE147507	Although several cell lines and conditions were used in this study, result of only one cell line was described	PPI network of 638 DE protein-coding genes and 332 SARS-CoV-2 protein interactors was constructed using STRING. Result revealed 21 differentially expressed lncRNAs broadly involved in cell survival and regulation of gene expression.		Turjya RR et al., 2020
KCNQ1OT1	Decreased	Cells infected with SARS-CoV-2 and COVID-19 patiens	human lung epithelium (NHBE) cells	GSE147507	Although several cell lines and conditions were used in this study, result of only one cell line was described	PPI network of 638 DE protein-coding genes and 332 SARS-CoV-2 protein interactors was constructed using STRING. Result revealed 21 differentially expressed lncRNAs broadly involved in cell survival and regulation of gene expression.		Turjya RR et al., 2020
LINC00504	Decreased	Cells infected with SARS-CoV-2 and COVID-19 patiens	human lung epithelium (NHBE) cells	GSE147507	Although several cell lines and conditions were used in this study, result of only one cell line was described	PPI network of 638 DE protein-coding genes and 332 SARS-CoV-2 protein interactors was constructed using STRING. Result revealed 21 differentially expressed lncRNAs broadly involved in cell survival and regulation of gene expression.		Turjya RR et al., 2020
GAS6-AS1	Decreased	Cells infected with SARS-CoV-2 and COVID-19 patiens	human lung epithelium (NHBE) cells	GSE147507	Although several cell lines and conditions were used in this study, result of only one cell line was described	PPI network of 638 DE protein-coding genes and 332 SARS-CoV-2 protein interactors was constructed using STRING. Result revealed 21 differentially expressed lncRNAs broadly involved in cell survival and regulation of gene expression.		Turjya RR et al., 2020
EGOT	Increased	Cells infected with SARS-CoV-2		GSE147507	Re-analysis of RNA sequencing data published earlier	Different cell lines infected with SARS-CoV-2; in some cells virus was infected together with exogenously expressed ACE	Several infection relevant pathways were enriched with the viral interacting proteins; regulation of the lncRNA was predicted from ChiPBase	Laha S et al., 2021
EPB41L4A-AS1	Increased	Cells infected with SARS-CoV-2		GSE147507	Re-analysis of RNA sequencing data published earlier	Different cell lines infected with SARS-CoV-2; in some cells virus was infected together with exogenously expressed ACE	Several infection relevant pathways were enriched with the viral interacting proteins; regulation of the lncRNA was predicted from ChiPBase	Laha S et al., 2021
HCG11	Increased	Cells infected with SARS-CoV-2		GSE147507	Re-analysis of RNA sequencing data published earlier	Different cell lines infected with SARS-CoV-2; in some cells virus was infected together with exogenously expressed ACE	Several infection relevant pathways were enriched with the viral interacting proteins; regulation of the lncRNA was predicted from ChiPBase	Laha S et al., 2021
HIF1A-AS2	Increased	Cells infected with SARS-CoV-2		GSE147507	Re-analysis of RNA sequencing data published earlier	Different cell lines infected with SARS-CoV-2; in some cells virus was infected together with exogenously expressed ACE	Several infection relevant pathways were enriched with the viral interacting proteins; regulation of the lncRNA was predicted from ChiPBase	Laha S et al., 2021
LINC00115	Increased	Cells infected with SARS-CoV-2		GSE147507	Re-analysis of RNA sequencing data published earlier	Different cell lines infected with SARS-CoV-2; in some cells virus was infected together with exogenously expressed ACE	Several infection relevant pathways were enriched with the viral interacting proteins; regulation of the lncRNA was predicted from ChiPBase	Laha S et al., 2021
LINC00174	Increased	Cells infected with SARS-CoV-2		GSE147507	Re-analysis of RNA sequencing data published earlier	Different cell lines infected with SARS-CoV-2; in some cells virus was infected together with exogenously expressed ACE	Several infection relevant pathways were enriched with the viral interacting proteins; regulation of the lncRNA was predicted from ChiPBase	Laha S et al., 2021
LINC00265	Increased	Cells infected with SARS-CoV-2		GSE147507	Re-analysis of RNA sequencing data published earlier	Different cell lines infected with SARS-CoV-2; in some cells virus was infected together with exogenously expressed ACE	Several infection relevant pathways were enriched with the viral interacting proteins; regulation of the lncRNA was predicted from ChiPBase	Laha S et al., 2021
LINC00312	Increased	Cells infected with SARS-CoV-2		GSE147507	Re-analysis of RNA sequencing data published earlier	Different cell lines infected with SARS-CoV-2; in some cells virus was infected together with exogenously expressed ACE	Several infection relevant pathways were enriched with the viral interacting proteins; regulation of the lncRNA was predicted from ChiPBase	Laha S et al., 2021
LINC00473	Increased	Cells infected with SARS-CoV-2		GSE147507	Re-analysis of RNA sequencing data published earlier	Different cell lines infected with SARS-CoV-2; in some cells virus was infected together with exogenously expressed ACE	Several infection relevant pathways were enriched with the viral interacting proteins; regulation of the lncRNA was predicted from ChiPBase	Laha S et al., 2021
LINC00488	Decreased	Cells infected with SARS-CoV-2		GSE147507	Re-analysis of RNA sequencing data published earlier	Different cell lines infected with SARS-CoV-2; in some cells virus was infected together with exogenously expressed ACE	Several infection relevant pathways were enriched with the viral interacting proteins; regulation of the lncRNA was predicted from ChiPBase	Laha S et al., 2021
LINC00605	Increased	Cells infected with SARS-CoV-2		GSE147507	Re-analysis of RNA sequencing data published earlier	Different cell lines infected with SARS-CoV-2; in some cells virus was infected together with exogenously expressed ACE	Several infection relevant pathways were enriched with the viral interacting proteins; regulation of the lncRNA was predicted from ChiPBase	Laha S et al., 2021
LINC00662	Increased	Cells infected with SARS-CoV-2		GSE147507	Re-analysis of RNA sequencing data published earlier	Different cell lines infected with SARS-CoV-2; in some cells virus was infected together with exogenously expressed ACE	Several infection relevant pathways were enriched with the viral interacting proteins; regulation of the lncRNA was predicted from ChiPBase	Laha S et al., 2021
LINC00842	Increased	Cells infected with SARS-CoV-2		GSE147507	Re-analysis of RNA sequencing data published earlier	Different cell lines infected with SARS-CoV-2; in some cells virus was infected together with exogenously expressed ACE	Several infection relevant pathways were enriched with the viral interacting proteins; regulation of the lncRNA was predicted from ChiPBase	Laha S et al., 2021
LINC00857	Decreased	Cells infected with SARS-CoV-2		GSE147507	Re-analysis of RNA sequencing data published earlier	Different cell lines infected with SARS-CoV-2; in some cells virus was infected together with exogenously expressed ACE	Several infection relevant pathways were enriched with the viral interacting proteins; regulation of the lncRNA was predicted from ChiPBase	Laha S et al., 2021
MALAT1	Increased	Cells infected with SARS-CoV-2		GSE147507	Re-analysis of RNA sequencing data published earlier	Different cell lines infected with SARS-CoV-2; in some cells virus was infected together with exogenously expressed ACE	Several infection relevant pathways were enriched with the viral interacting proteins; regulation of the lncRNA was predicted from ChiPBase	Laha S et al., 2021
MEG3	Increased	Cells infected with SARS-CoV-2		GSE147507	Re-analysis of RNA sequencing data published earlier	Different cell lines infected with SARS-CoV-2; in some cells virus was infected together with exogenously expressed ACE	Several infection relevant pathways were enriched with the viral interacting proteins; regulation of the lncRNA was predicted from ChiPBase	Laha S et al., 2021
MEG9	Increased	Cells infected with SARS-CoV-2		GSE147507	Re-analysis of RNA sequencing data published earlier	Different cell lines infected with SARS-CoV-2; in some cells virus was infected together with exogenously expressed ACE	Several infection relevant pathways were enriched with the viral interacting proteins; regulation of the lncRNA was predicted from ChiPBase	Laha S et al., 2021
MIAT	Increased	Cells infected with SARS-CoV-2		GSE147507	Re-analysis of RNA sequencing data published earlier	Different cell lines infected with SARS-CoV-2; in some cells virus was infected together with exogenously expressed ACE	Several infection relevant pathways were enriched with the viral interacting proteins; regulation of the lncRNA was predicted from ChiPBase	Laha S et al., 2021
NEAT1	Increased	Cells infected with SARS-CoV-2		GSE147507	Re-analysis of RNA sequencing data published earlier	Different cell lines infected with SARS-CoV-2; in some cells virus was infected together with exogenously expressed ACE	Several infection relevant pathways were enriched with the viral interacting proteins; regulation of the lncRNA was predicted from ChiPBase	Laha S et al., 2021
PART1	Decreased	Cells infected with SARS-CoV-2		GSE147507	Re-analysis of RNA sequencing data published earlier	Different cell lines infected with SARS-CoV-2; in some cells virus was infected together with exogenously expressed ACE	Several infection relevant pathways were enriched with the viral interacting proteins; regulation of the lncRNA was predicted from ChiPBase	Laha S et al., 2021
RMRP	Increased	Cells infected with SARS-CoV-2		GSE147507	Re-analysis of RNA sequencing data published earlier	Different cell lines infected with SARS-CoV-2; in some cells virus was infected together with exogenously expressed ACE	Several infection relevant pathways were enriched with the viral interacting proteins; regulation of the lncRNA was predicted from ChiPBase	Laha S et al., 2021
TERC	Increased	Cells infected with SARS-CoV-2		GSE147507	Re-analysis of RNA sequencing data published earlier	Different cell lines infected with SARS-CoV-2; in some cells virus was infected together with exogenously expressed ACE	Several infection relevant pathways were enriched with the viral interacting proteins; regulation of the lncRNA was predicted from ChiPBase	Laha S et al., 2021
ZNF674-AS1	Increased	Cells infected with SARS-CoV-2		GSE147507	Re-analysis of RNA sequencing data published earlier	Different cell lines infected with SARS-CoV-2; in some cells virus was infected together with exogenously expressed ACE	Several infection relevant pathways were enriched with the viral interacting proteins; regulation of the lncRNA was predicted from ChiPBase	Laha S et al., 2021
TP53TG1	Decreased	Cells infected with SARS-CoV-2		GSE147507	Re-analysis of RNA sequencing data published earlier	Different cell lines infected with SARS-CoV-2; in some cells virus was infected together with exogenously expressed ACE	Several infection relevant pathways were enriched with the viral interacting proteins; regulation of the lncRNA was predicted from ChiPBase	Laha S et al., 2021
NORAD	Not known						Interacting partners of cytokines altered in COVID-19	Morenikeji OB et al., 2021
RAD51-AS1	Not known						Interacting partners of cytokines altered in COVID-19	Morenikeji OB et al., 2021
SBF2-AS1	Not known						Interacting partners of cytokines altered in COVID-19	Morenikeji OB et al., 2021
TUG1	Not known						Interacting partners of cytokines altered in COVID-19	Morenikeji OB et al., 2021
SNHG1	Not known						Interacting partners of cytokines altered in COVID-19	Morenikeji OB et al., 2021
GAS5	Not known						Interacting partners of cytokines altered in COVID-19	Morenikeji OB et al., 2021
NRAV	Not known						Interacting partners of cytokines altered in COVID-19	Morenikeji OB et al., 2021
BANCR	Not known						Interacting partners of cytokines altered in COVID-19	Morenikeji OB et al., 2021
DRAIC	Not known						Interacting partners of cytokines altered in COVID-19	Morenikeji OB et al., 2021
LNCSRLR	Not known						Interacting partners of cytokines altered in COVID-19	Morenikeji OB et al., 2021
LNC-LBCS	Not known						Interacting partners of cytokines altered in COVID-19	Morenikeji OB et al., 2021
SENCR	Not known						Interacting partners of cytokines altered in COVID-19	Morenikeji OB et al., 2021
STXBP5-AS1	Not known						Interacting partners of cytokines altered in COVID-19	Morenikeji OB et al., 2021
THRIL	Not known						Interacting partners of cytokines altered in COVID-19	Morenikeji OB et al., 2021
TMEVPG1/IFNG-AS1	Not known						Interacting partners of cytokines altered in COVID-19	Morenikeji OB et al., 2021
PRC1-AS1	Not known						Interacting partners of cytokines altered in COVID-19	Morenikeji OB et al., 2021
MALAT1	Not known						Interacting partners of cytokines altered in COVID-19	Morenikeji OB et al., 2021
CDK6-AS1	Not known						Interacting partners of cytokines altered in COVID-19	Morenikeji OB et al., 2021
CASC15	Not known						Interacting partners of cytokines altered in COVID-19	Morenikeji OB et al., 2021
References
TaheriM,RadLM,HussenBM,NicknafsF,SayadA,Ghafouri-FardS.EvaluationofexpressionofVDR-associatedlncRNAsinCOVID-19patients.BMCInfectDis.2021Jun19;21(1):588.doi:10.1186/s12879-021-06248-8.PMID:34147082;PMCID:PMC8214050.
[truncated: 9 more rows]

## Sheet: Table S6-S9
Supplementary Table STX1A: Increased expression of lncRNA in more than one study.													genes	Altered					Supplementary Table STX1B: Decreased expression of the lncRNA in the present study.													Decreased expression of the lncRNA in the present study						Supplementary Table STX1C: Altered expression of lncRNA in one experiments.
[truncated: 233 more rows]

[truncated: 16 more sheets: Table S10-S13, Table S14-S15, Table S16-S19, Table S20-S21, Table S22-S23, Table S24-S27, Table S28-S29, Table S30-S31, Table S32, Table S33, Table S34-S37, Table S38-42, Table S43-47, Table S48-49, Table S50-51, Table S52-S53]
